# Supplementary material for: A mild and efficient Zn-catalyzed C-glycosylation: synthesis of C(2)–C(3) unsaturated C-linked glycopyranosides
Source: Royal Society of Chemistry journal article supplement (doi:10.1039/c5ra03328d), 2015-01-01

# **A mild and efficient Zn-catalyzed C-glycosylation: Synthesis of C(2)-C(3) unsaturated C-linked glycopyranosides**

Thurpu Raghavender Reddy, Dodla Sivanageswara Rao, and  
Sudhir Kashyap\*

*D-207, Discovery Laboratory, Organic and Biomolecular Chemistry Division,  
CSIR-Indian Institute of Chemical Technology, Hyderabad-500 007, INDIA*

*\* Corresponding author. Tel.: +91-402-716-1649; fax: +91-402-716-0387;  
e-mail: [skashyap@iict.res.in](mailto:skashyap@iict.res.in)*

## Supporting Information

### Index

|                                                           |        |
|-----------------------------------------------------------|--------|
| General synthesis information                             | S2     |
| General procedure for chemical synthesis                  | S3     |
| <sup>1</sup> H, <sup>13</sup> C NMR Spectra of glycosides | S4-S38 |

## Experimental

**General Synthesis Information.** Reactions were run in screw capped glass vials (4 mL) stirred with Teflon®-coated magnetic stir bars. Moisture and air-sensitive reactions were performed in flame-dried round bottom flasks, fitted with rubber septa or glass gas adapters, under a positive pressure of nitrogen. Moisture and air-sensitive liquids or solutions were transferred via nitrogen-flushed syringe. Concentration of solvents was accomplished by rotary evaporation using a Büchi rotary evaporator at temperatures between 35 °C and 50 °C. Experiments were monitored by thin layer chromatography (TLC).

**Materials.** Unless otherwise noted, materials were obtained from commercial suppliers and used without purification. Removal of solvent under reduced pressure refers to distillation with a Büchi rotary evaporator attached to a vacuum pump (~3 mmHg). Products obtained as solids or high boiling oils were dried under vacuum (~1 mmHg).

**Chromatography.** Analytical TLC was performed using Whatman 250 micron aluminum backed UV F254 pre-coated silica gel flexible plates. Subsequent to elution, ultraviolet illumination at 254 nm allowed for visualization of UV active materials. Staining with p-anisaldehyde, basic potassium permanganate solution, or Molisch's reagents allowed for further visualization. The retardation factor (R<sub>f</sub>) is the ratio of the distance traveled by the compound to the distance traveled by the eluent.

**Physical Data.** Proton nuclear magnetic resonance spectra (<sup>1</sup>H NMR) were recorded on Avance 300 or Avance 500 MHz nuclear magnetic resonance spectrometers. Chemical shifts for <sup>1</sup>H NMR spectra are reported as δ in units of parts per million (ppm) relative to tetramethylsilane (δ 0.0) using the residual solvent signal as an internal standard or tetramethylsilane itself: chloroform-d (δ 7.26, singlet). The number of protons (n) for a given resonance is indicated by nH. IR spectra were recorded on Bruker Alpha spectrometer and mass analyses (ESI) were performed on Finnegan MAT 1020 mass spectrometer operating at 70 eV.

**General experimental procedure for the synthesis of glycosides 3-31;** To a stirred solution of glycal (1 equiv) and acceptor (1.2 equiv) in anhydrous 1,2-dichloroethane (2 mL/mmol) under an atmosphere of argon was added  $\text{Zn}(\text{OTf})_2$  (10 mol%) at room temperature. The reaction mixture was stirred at 40 °C until the complete consumption of the starting material (glycal), adjudged by TLC. The reaction was quenched with saturated  $\text{NaHCO}_3$  (5 mL), diluted with EtOAc (10 mL), and extracted with EtOAc (3 X 30 mL). The combined organic layers were washed with brine solution, dried over anhydrous  $\text{Na}_2\text{SO}_4$ , concentrated *in vacuo* and purified by silica gel column chromatography. All the compounds were confirmed by  $^1\text{H}$  NMR,  $^{13}\text{C}$  NMR and MS/HRMS spectroscopy and overall data were in complete agreement with the assigned structure.

**General experimental procedure for the synthesis of glycosides 32-35;** To a stirred solution of  $\text{Zn}(\text{OTf})_2$  (10 mol%) in 1,2-dichloroethane (2 mL/mmol) in a two-necked round-bottom flask under an atmosphere of argon was added a solution of trimethylaluminum (2.0 M in hexanes, 1.5 equiv) at 0 °C. The reaction mixture was stirred vigorously for 10-15 min at ice-cooled temperature. A preformed solution of glycal (1.0 equiv) in anhydrous 1,2-dichloroethane (2 mL/mmol) was added dropwise to the above-mentioned reaction mixture and reaction mixture was allowed to stirred at room temperature for 1h. The reaction was quenched with saturated  $\text{NaHCO}_3$  (5 mL), diluted with EtOAc (10 mL), and extracted with EtOAc (3 X 30 mL). The combined organic layers were washed with brine solution, dried over anhydrous  $\text{Na}_2\text{SO}_4$ , concentrated *in vacuo* and purified by silica gel column chromatography to obtain the desired methyl glycosides.

### <sup>1</sup>H NMR Spectrum of compound **3** in CDCl<sub>3</sub> (300 MHz)

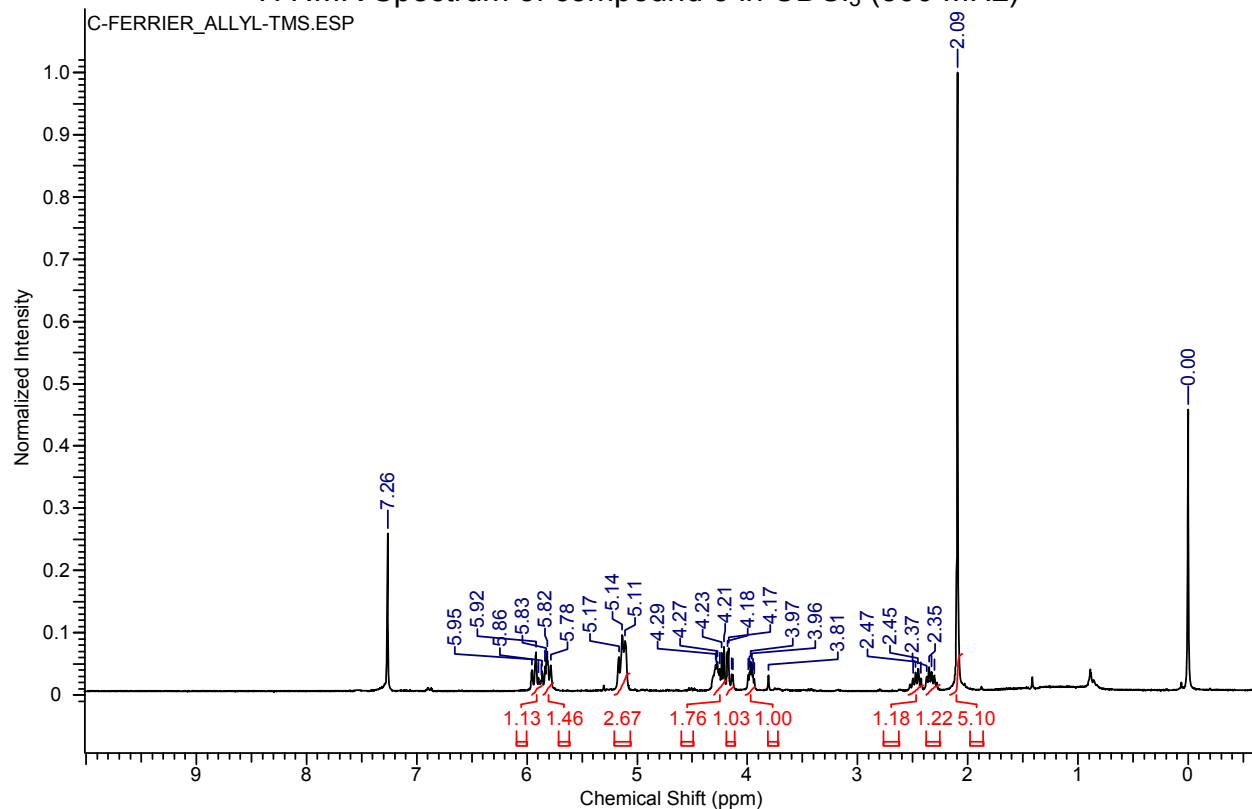

### <sup>13</sup>C NMR Spectrum of compound **3** in CDCl<sub>3</sub> (75 MHz)

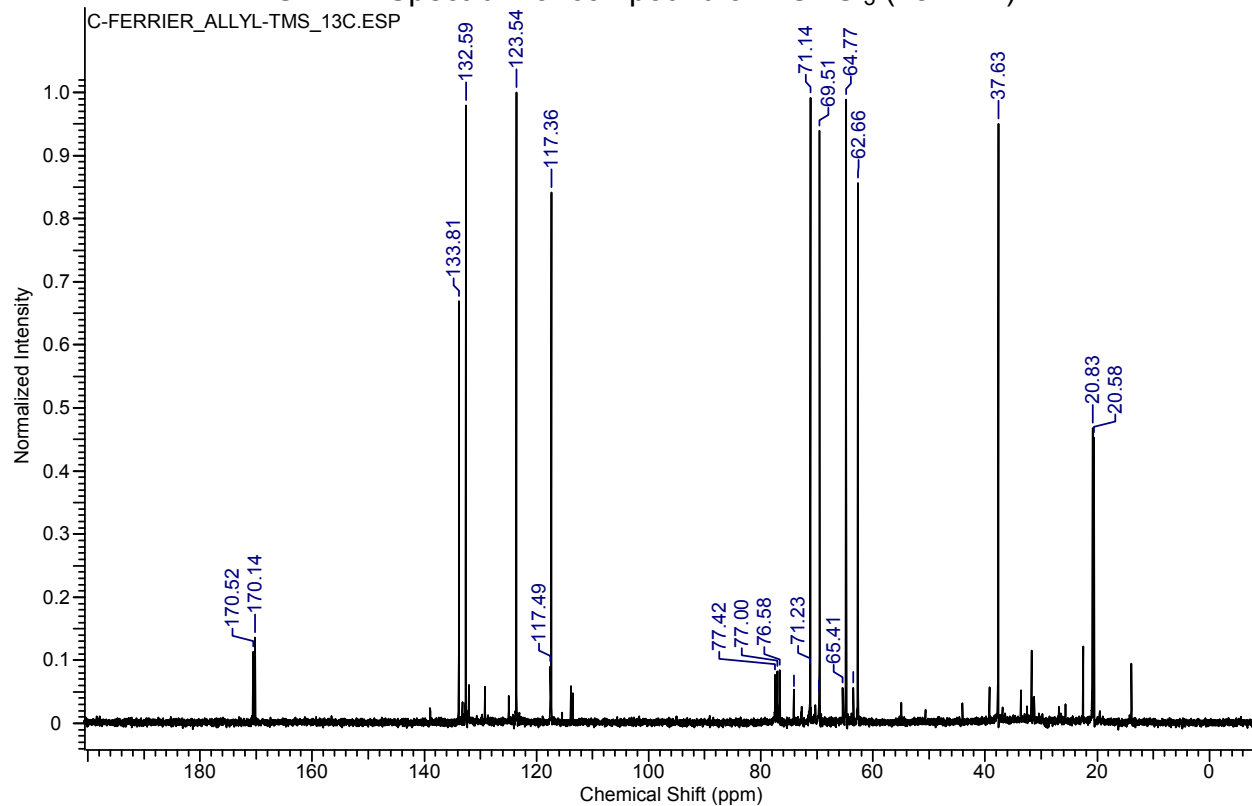

### <sup>1</sup>H NMR Spectrum of compound **4** in CDCl<sub>3</sub> (300 MHz)

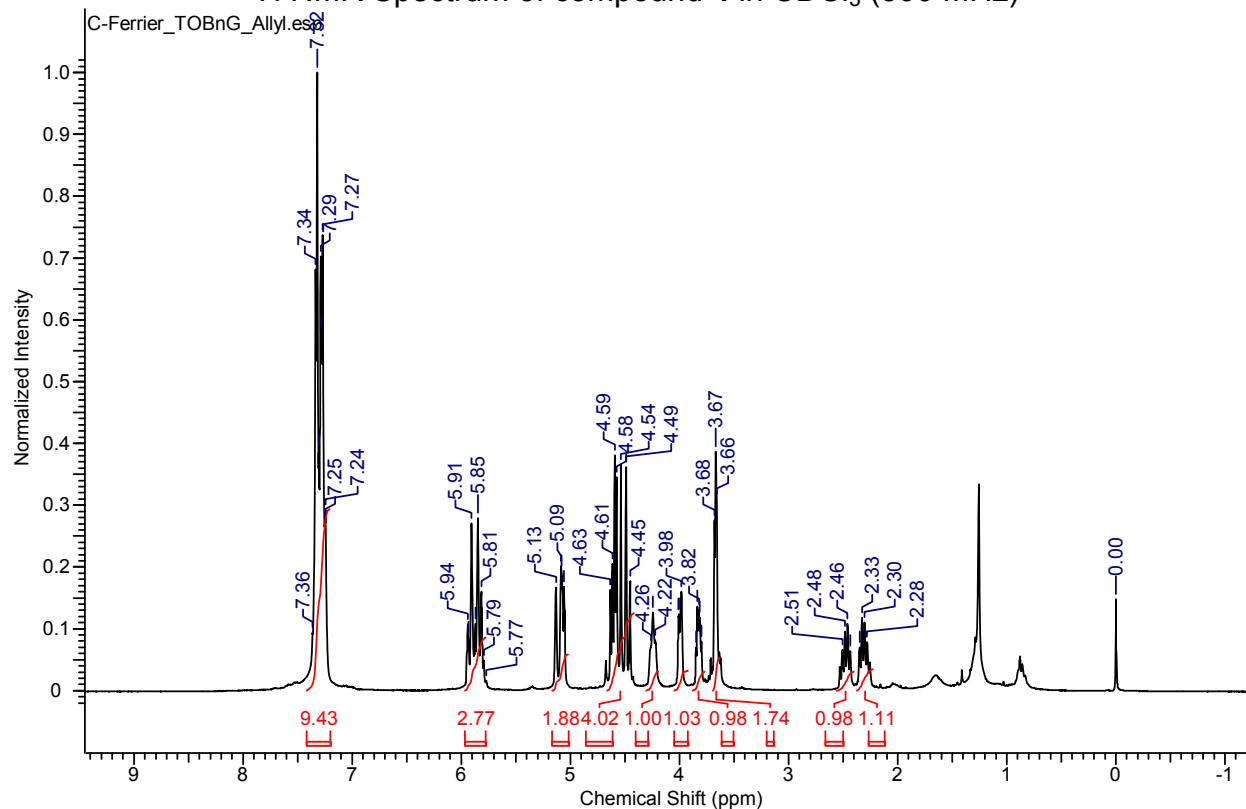

### <sup>13</sup>C NMR Spectrum of compound **4** in CDCl<sub>3</sub> (125 MHz)

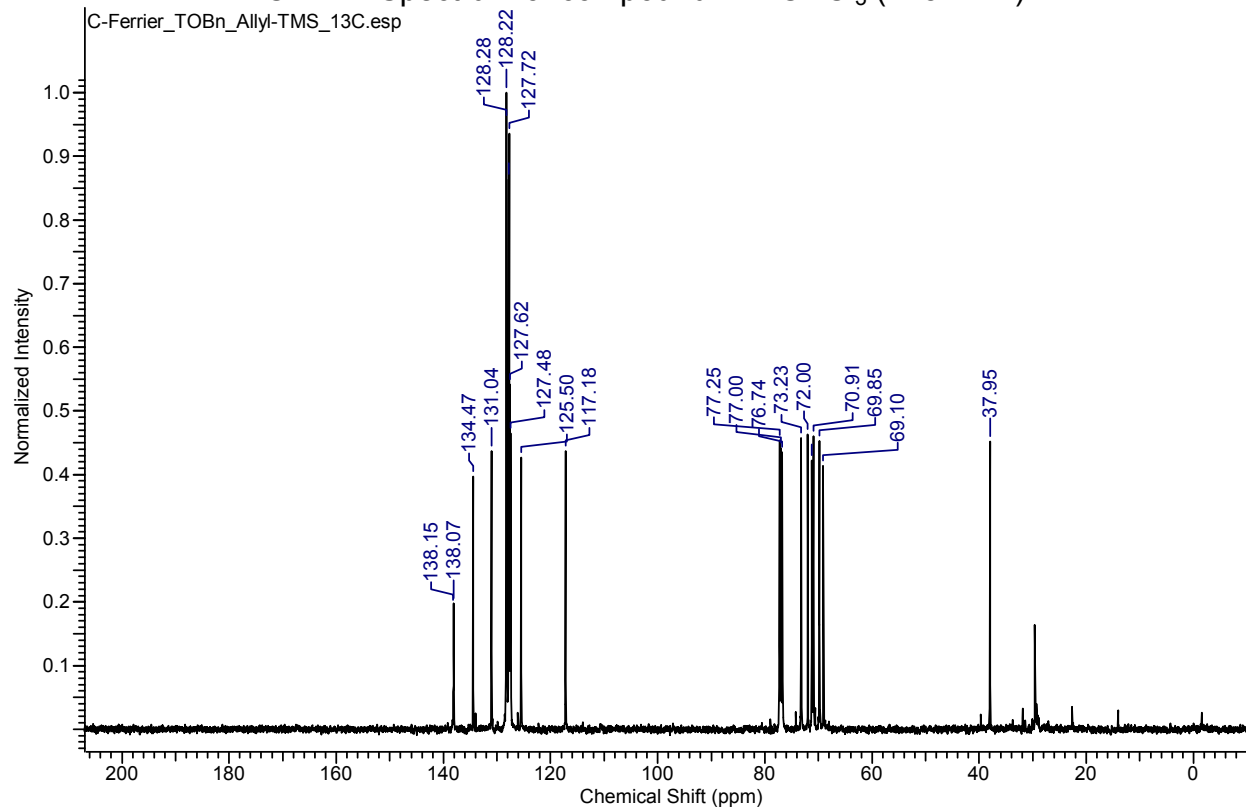

### <sup>1</sup>H NMR Spectrum of compound **5** in CDCl<sub>3</sub> (300 MHz)

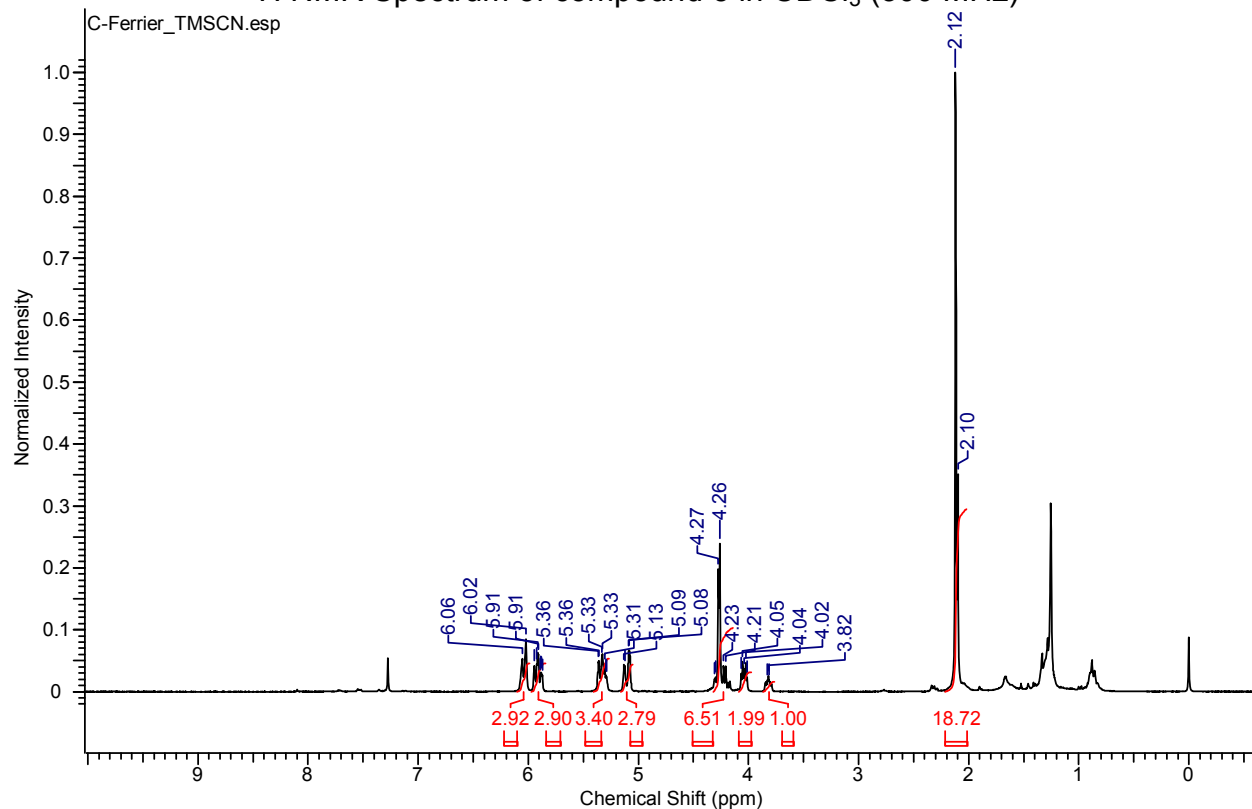

### <sup>13</sup>C NMR Spectrum of compound **5** in CDCl<sub>3</sub> (125 MHz)

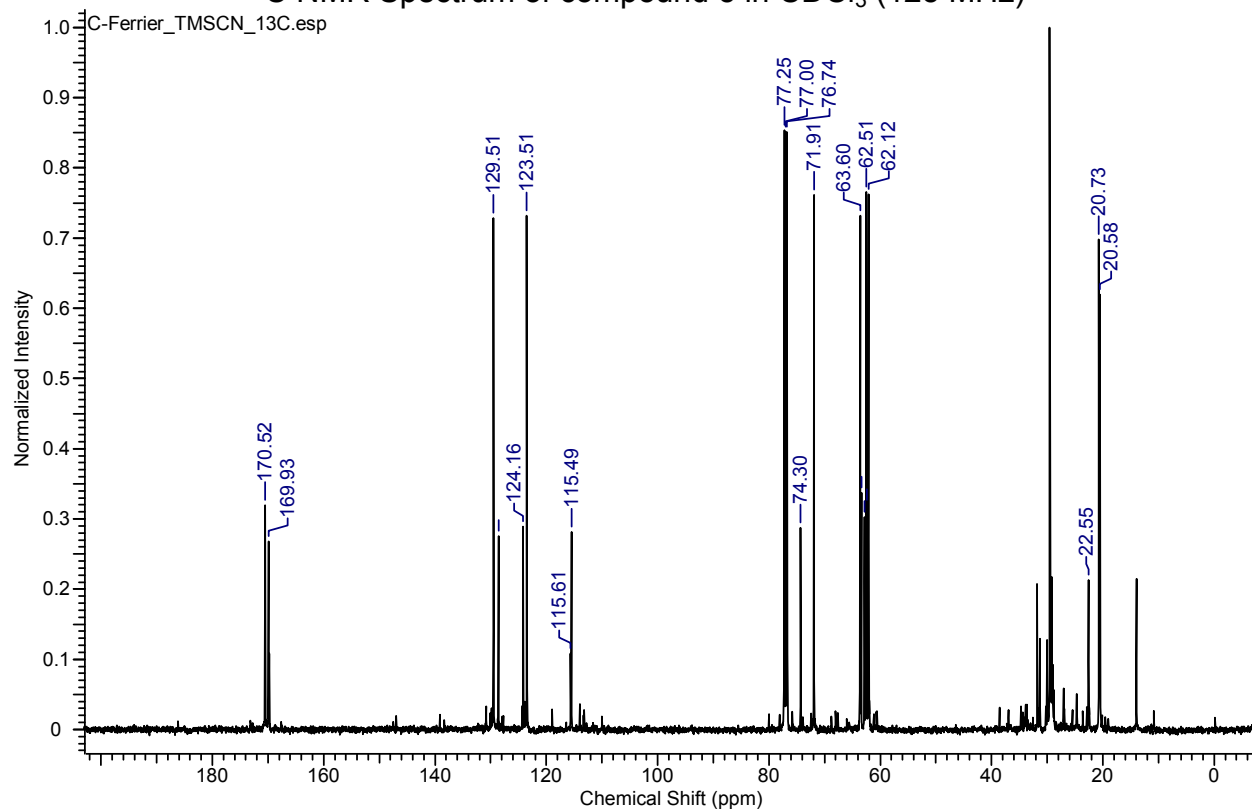

### <sup>1</sup>H NMR Spectrum of compound **6** in CDCl<sub>3</sub> (300 MHz)

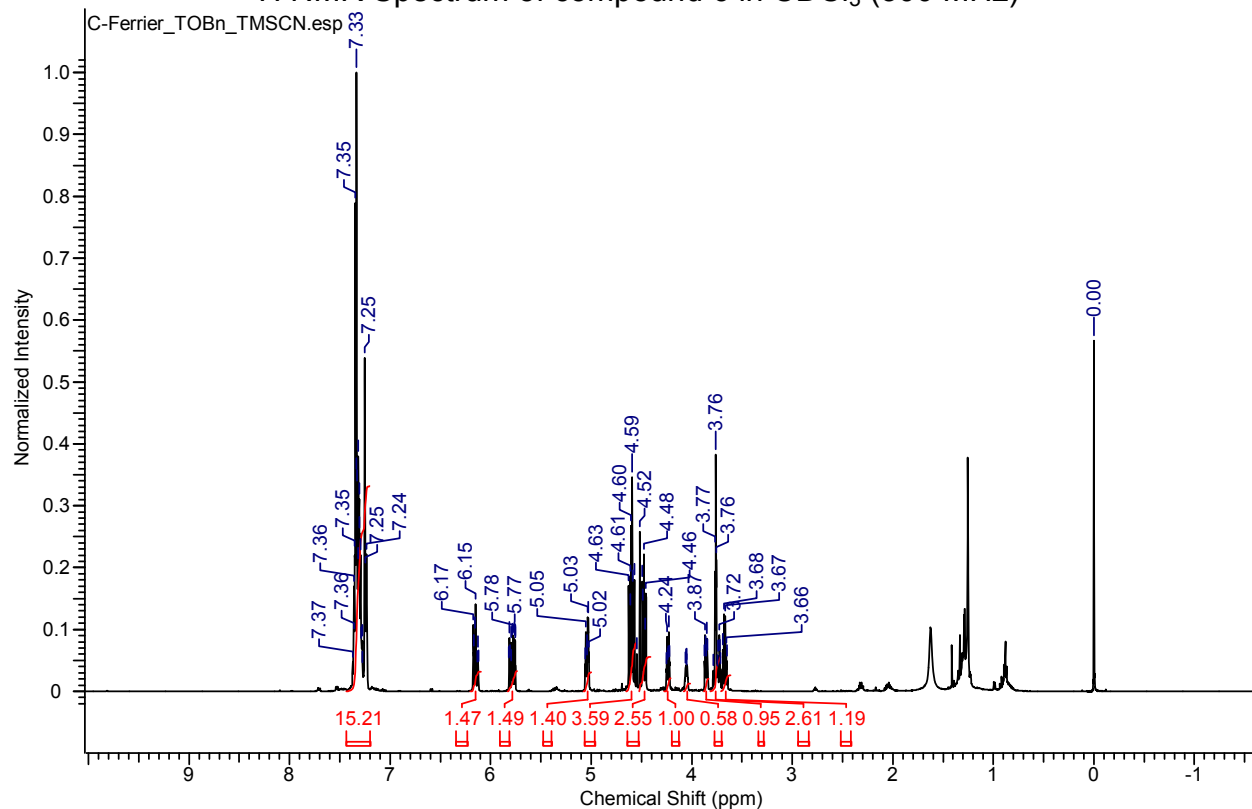

### <sup>13</sup>C NMR Spectrum of compound **6** in CDCl<sub>3</sub> (75 MHz)

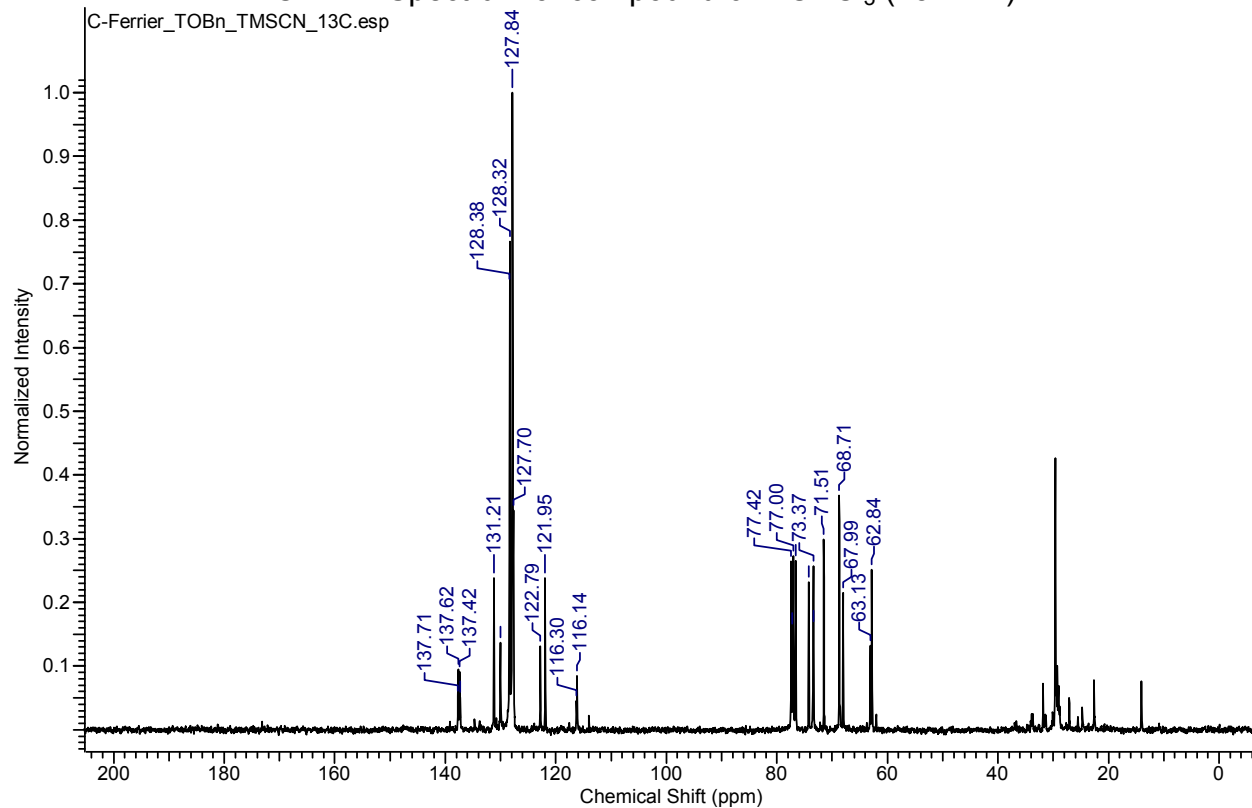

### <sup>1</sup>H NMR Spectrum of compound 7 in CDCl<sub>3</sub> (300 MHz)

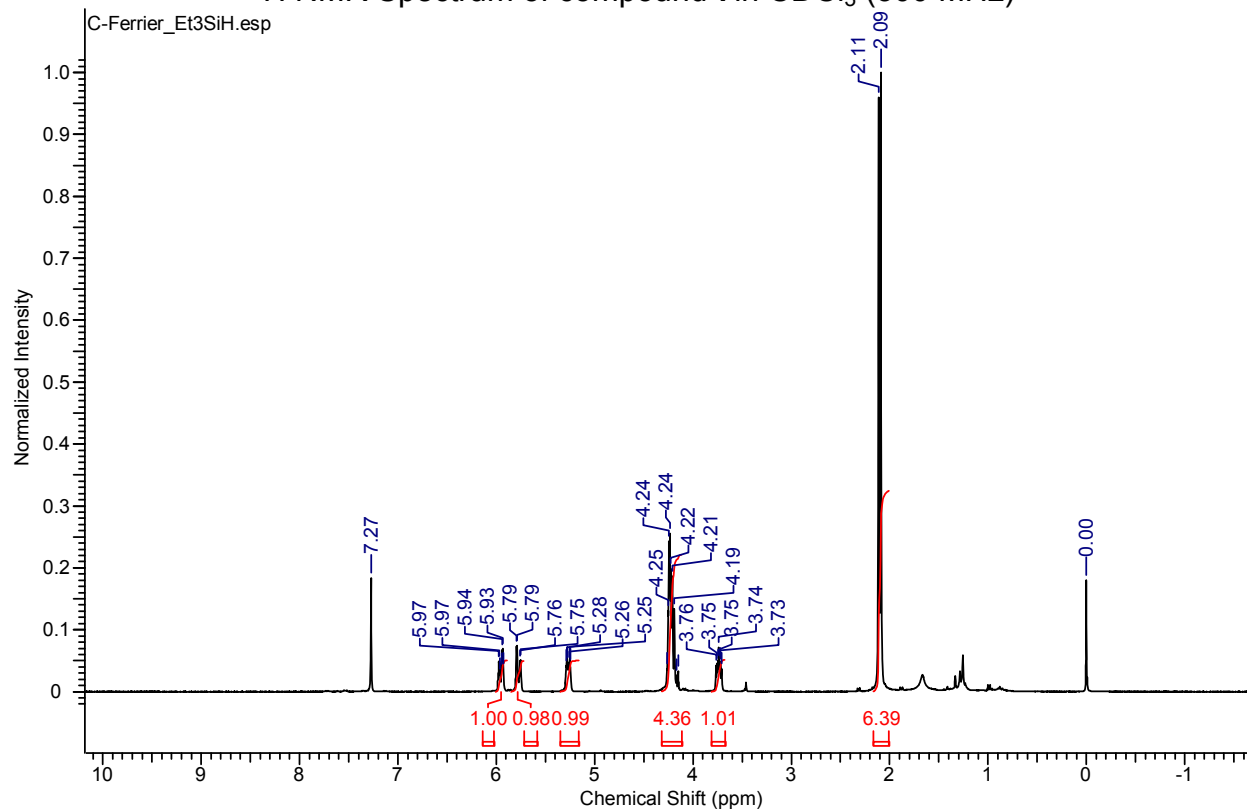

### <sup>13</sup>C NMR Spectrum of compound 7 in CDCl<sub>3</sub> (75 MHz)

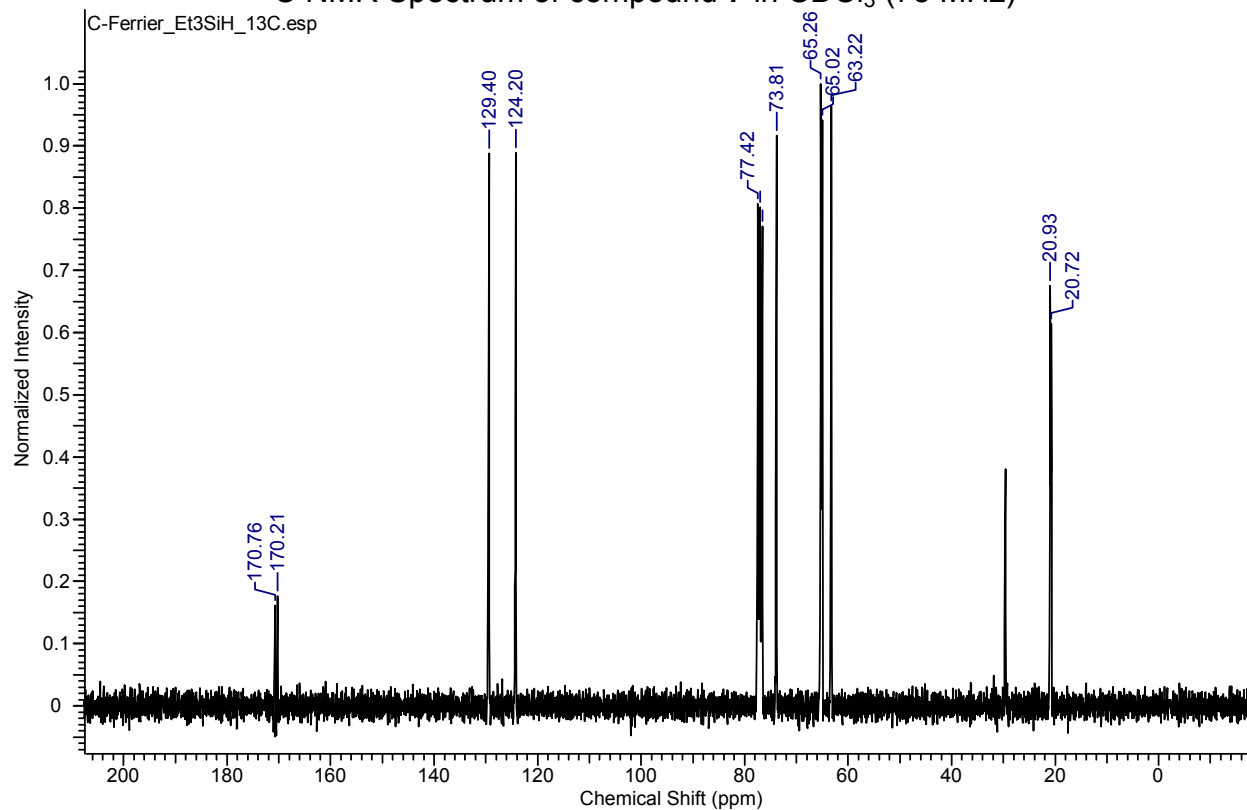



### <sup>1</sup>H NMR Spectrum of compound **8** in CDCl<sub>3</sub> (300 MHz)

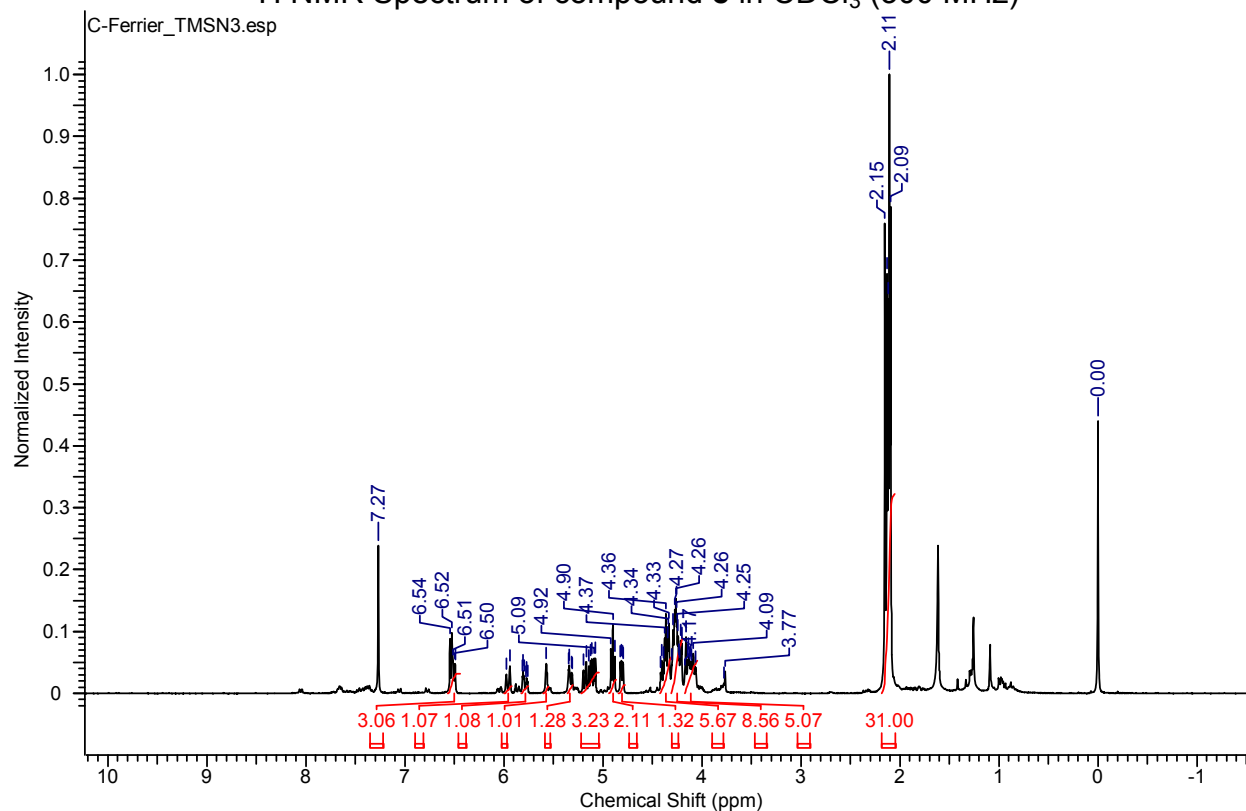

### <sup>13</sup>C NMR Spectrum of compound **8** in CDCl<sub>3</sub> (125 MHz)

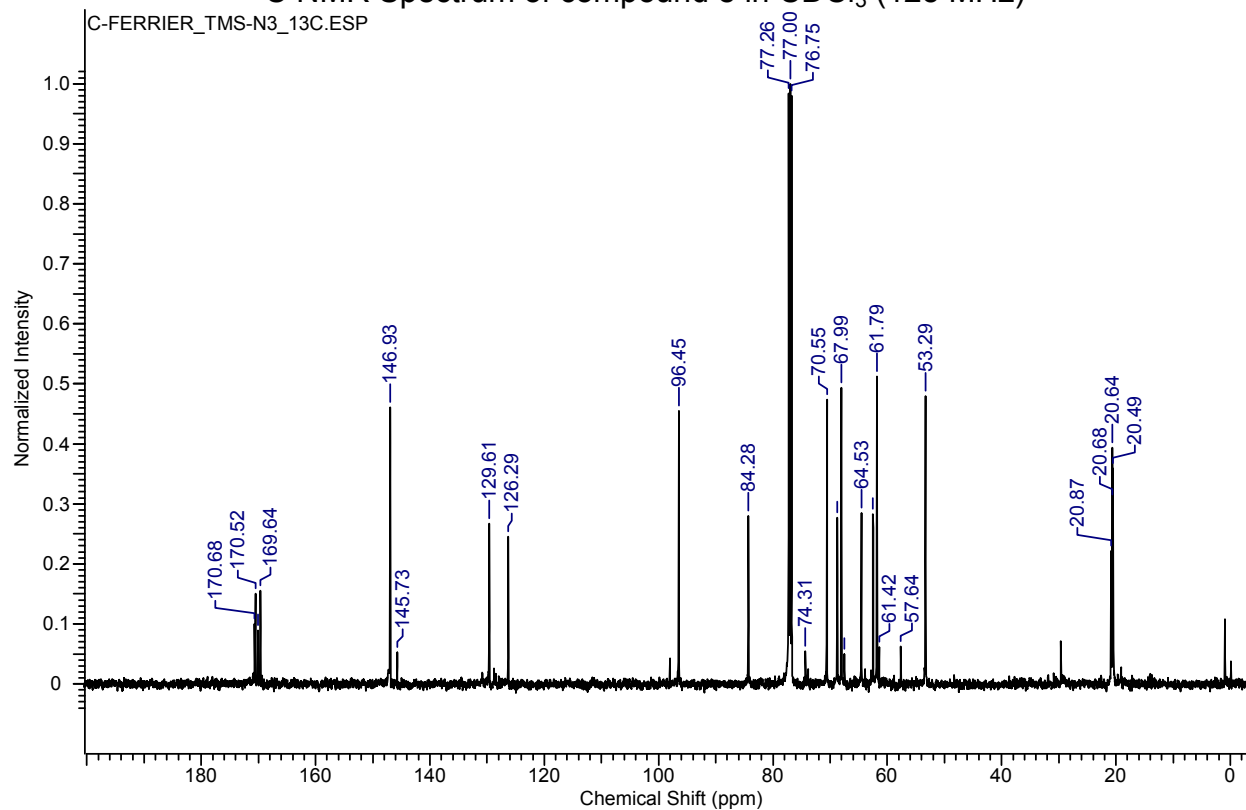

### <sup>1</sup>H NMR Spectrum of compound **9** in CDCl<sub>3</sub> (300 MHz)

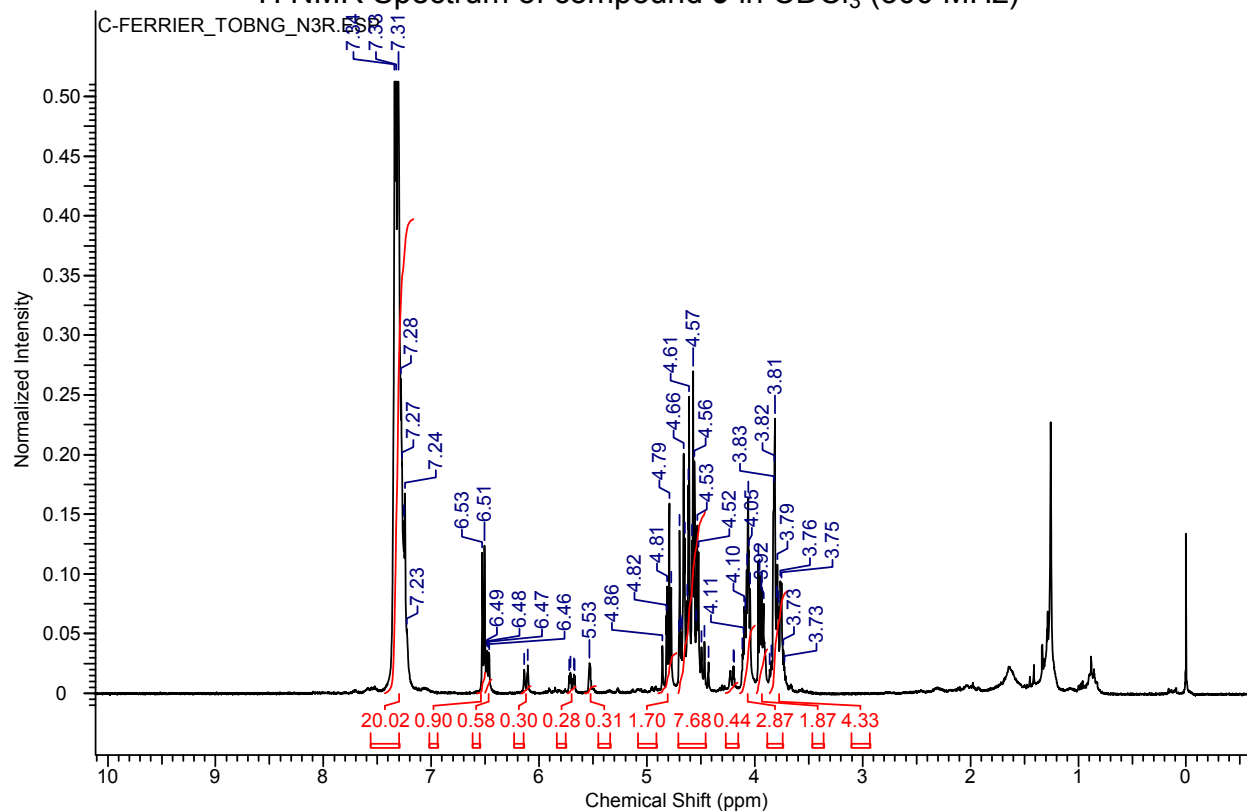

### <sup>13</sup>C NMR Spectrum of compound **9** in CDCl<sub>3</sub> (75 MHz)

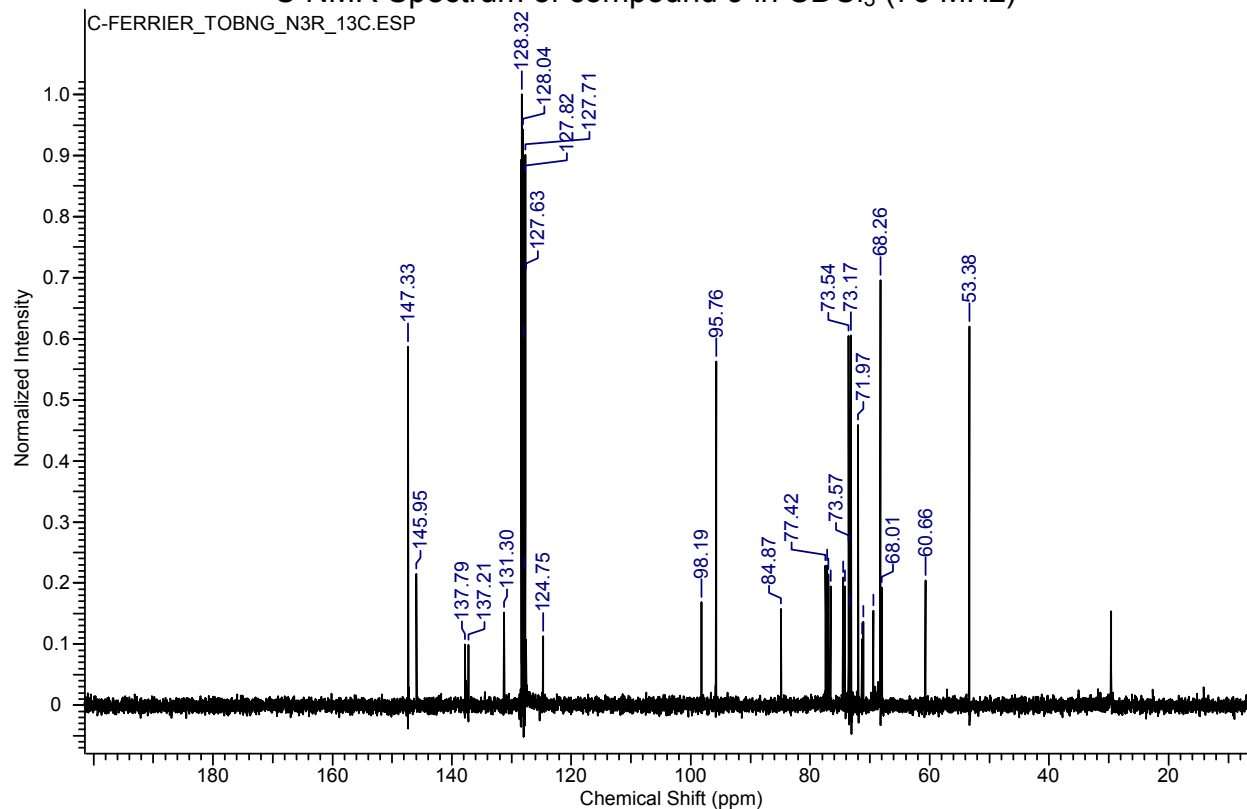

# <sup>1</sup>H NMR Spectrum of compound **10** in CDCl<sub>3</sub> (500 MHz)

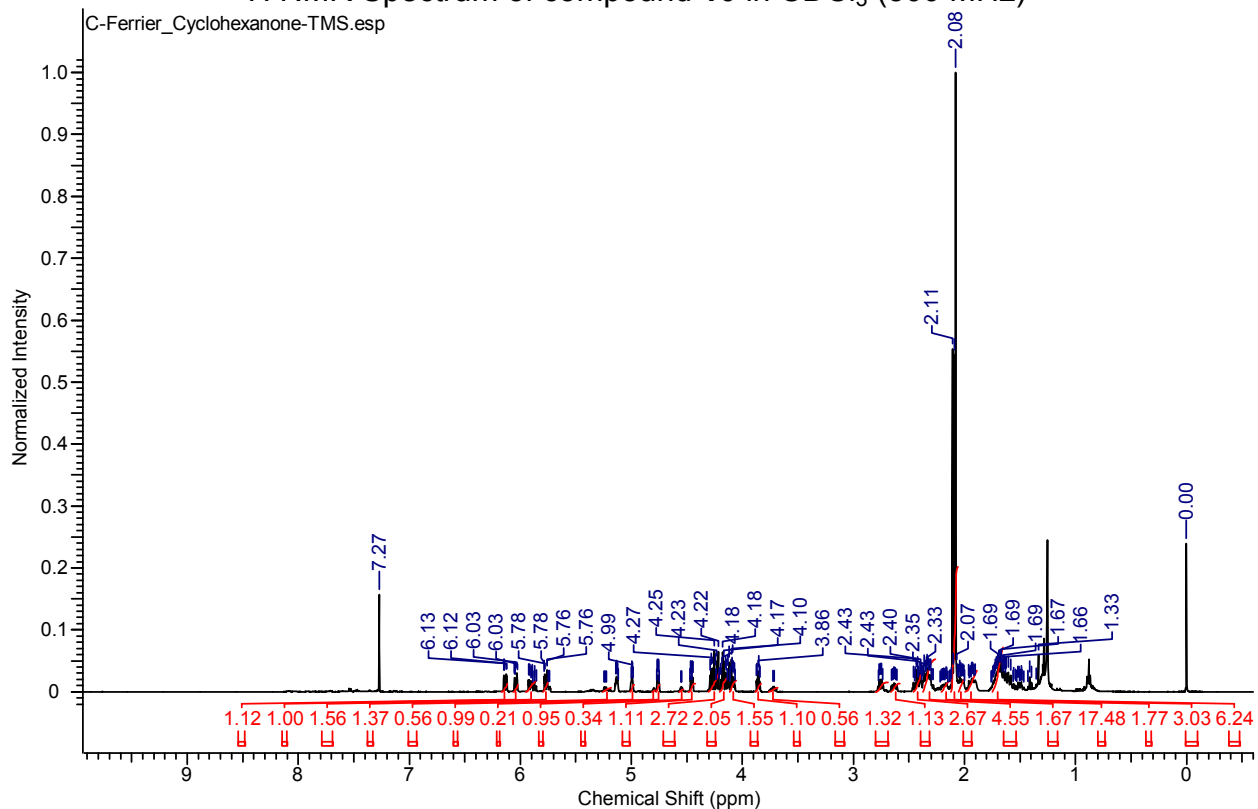

# <sup>13</sup>C NMR Spectrum of compound **10** in CDCl<sub>3</sub> (125MHz)

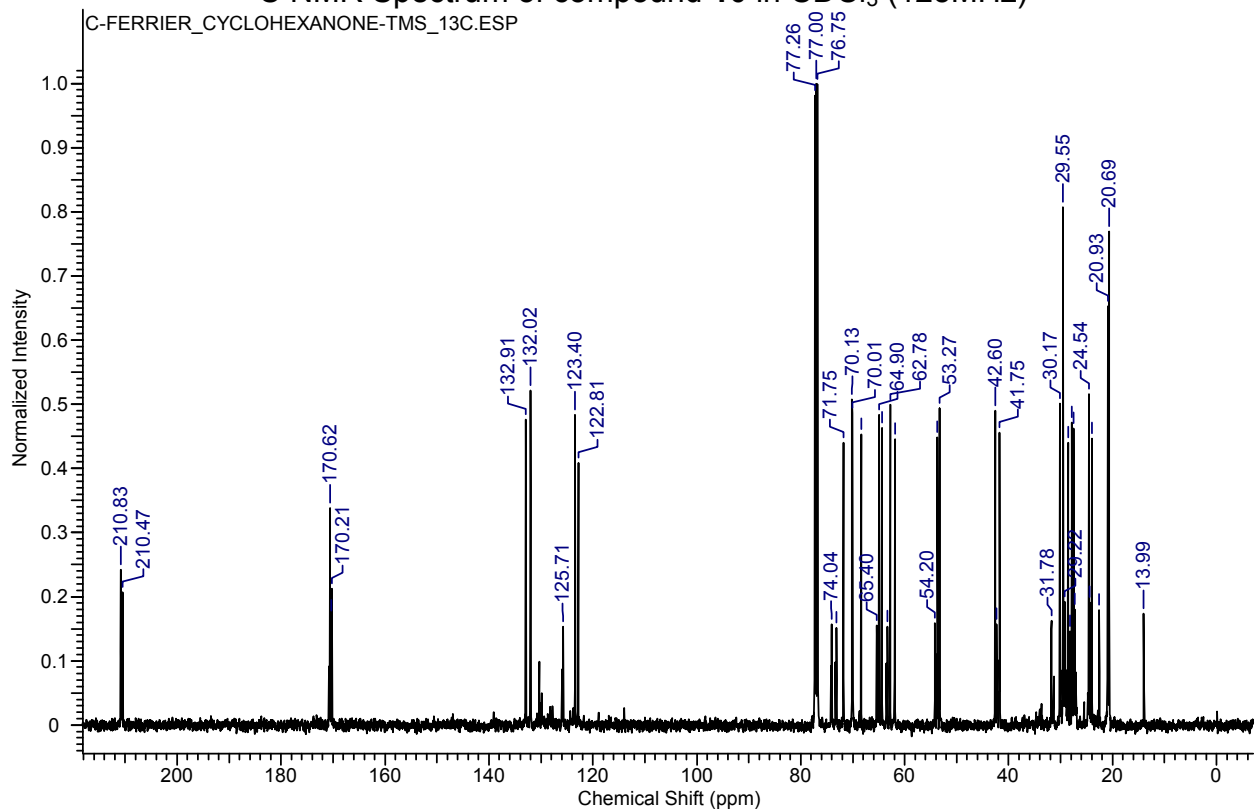

### <sup>1</sup>H NMR Spectrum of compound **11** in CDCl<sub>3</sub> (300 MHz)

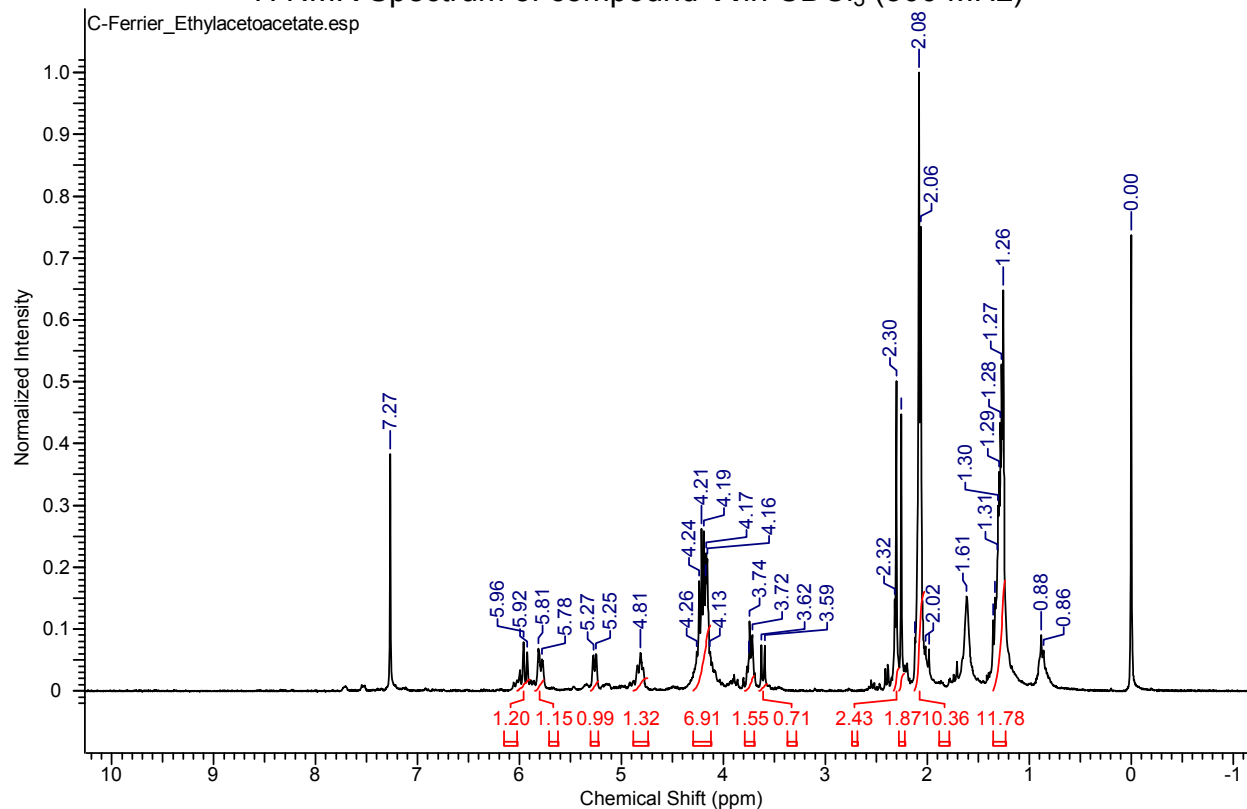

### <sup>13</sup>C NMR Spectrum of compound **11** in CDCl<sub>3</sub> (75 MHz)

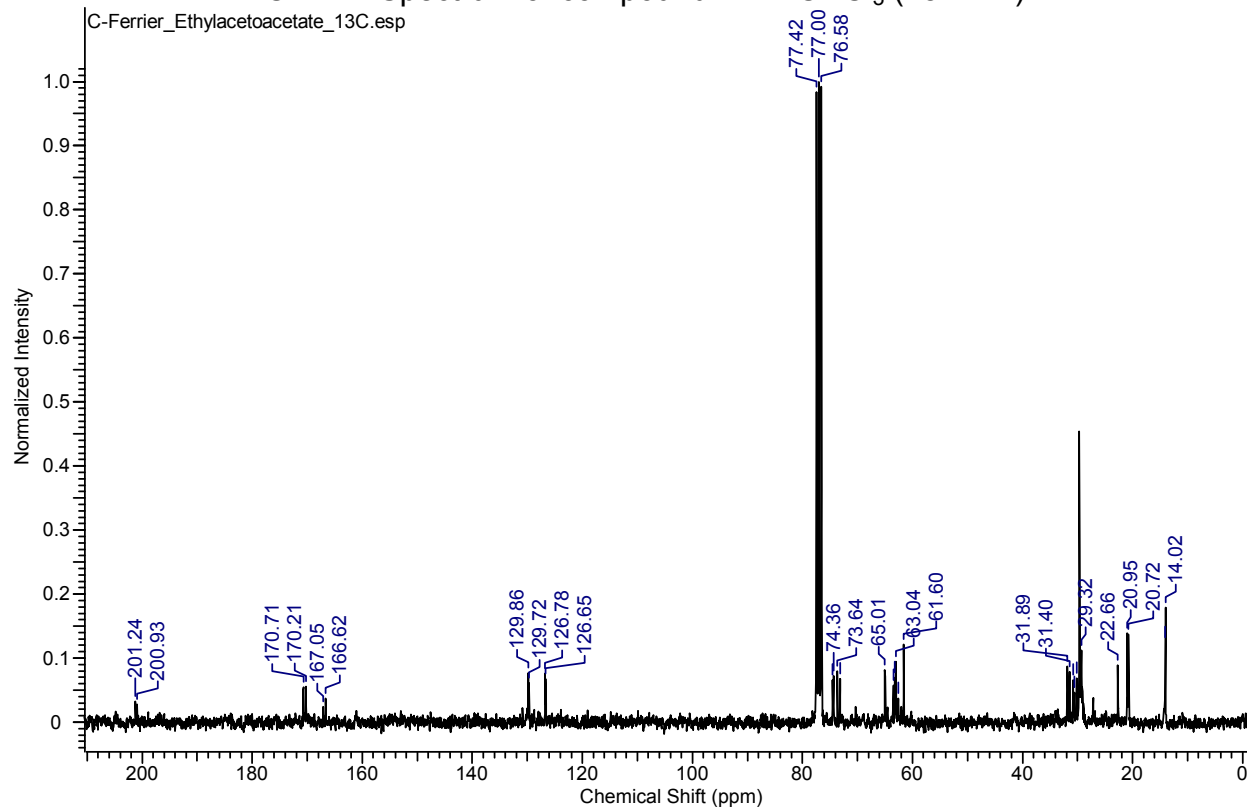

<sup>1</sup>H NMR Spectrum of compound **12'** in CDCl<sub>3</sub> (500 MHz)

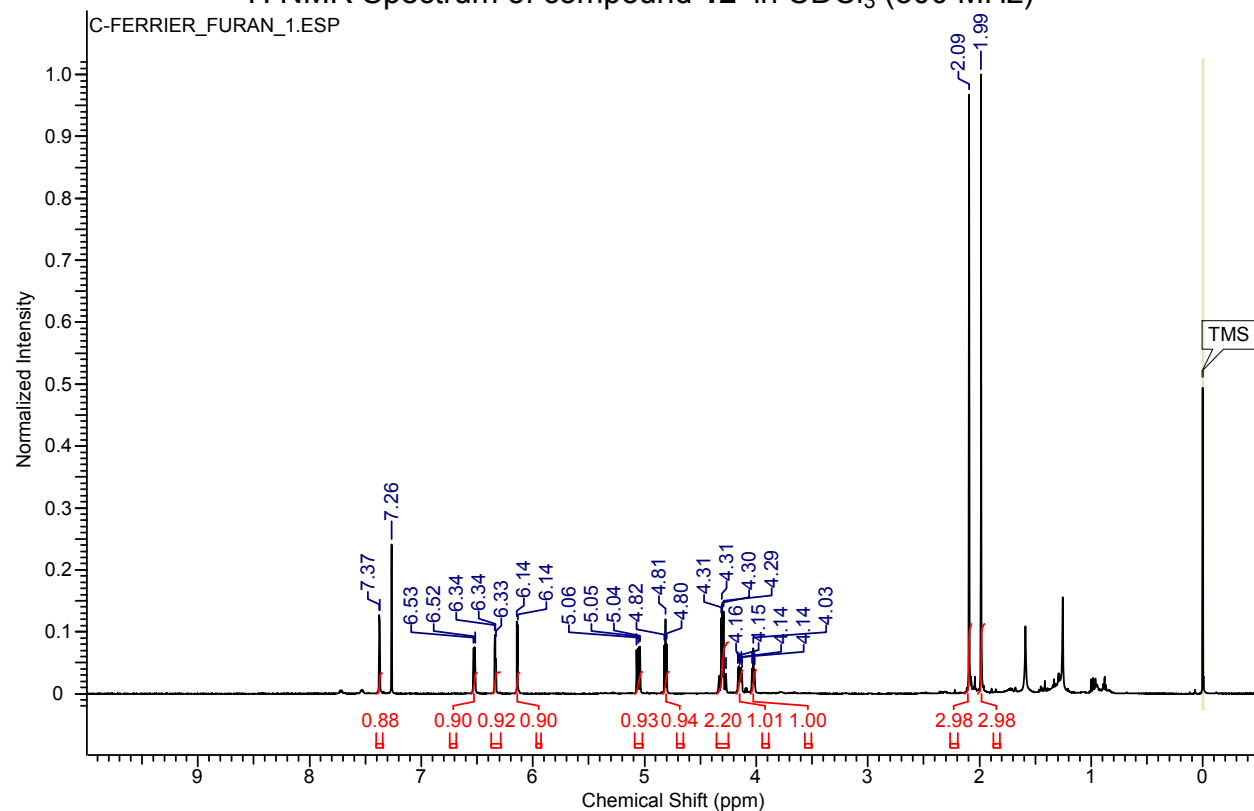

<sup>13</sup>C NMR Spectrum of compound **12'** in CDCl<sub>3</sub> (125 MHz)

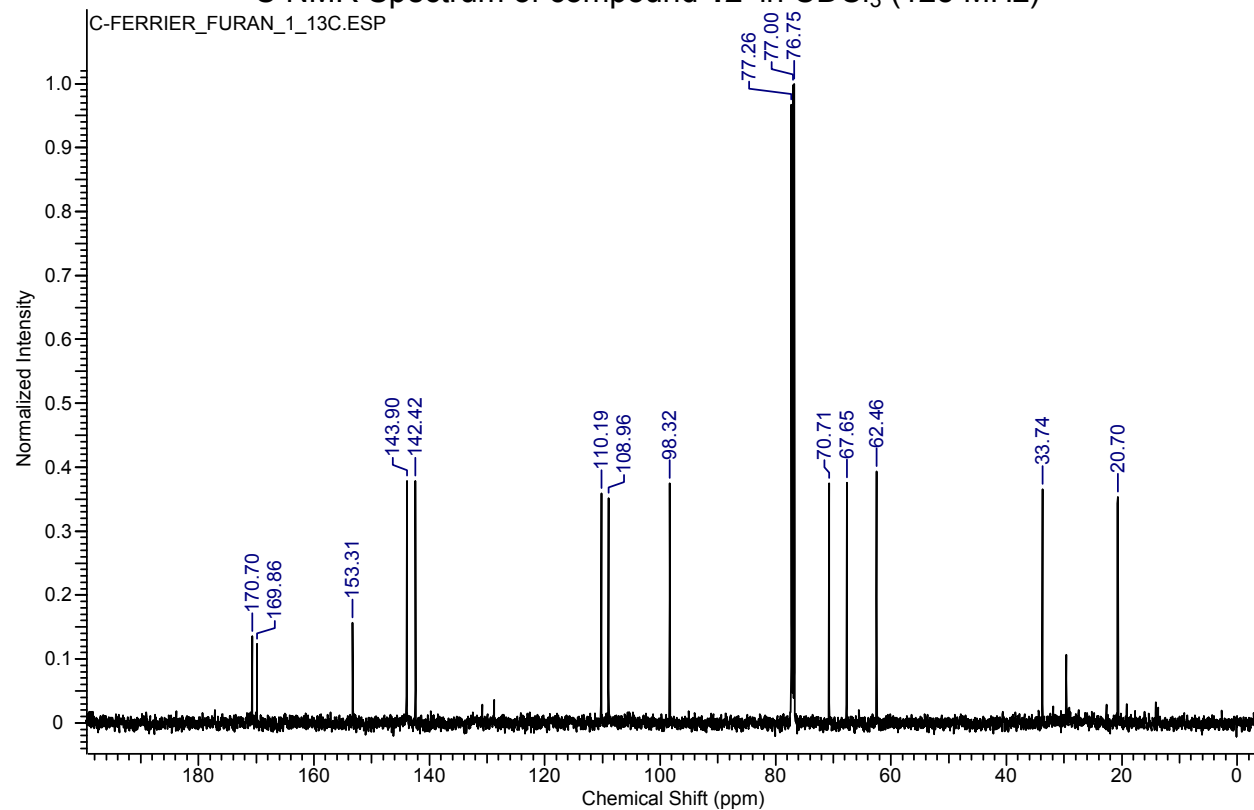

<sup>1</sup>H NMR Spectrum of compound **12+12'** in CDCl<sub>3</sub> (500 MHz)

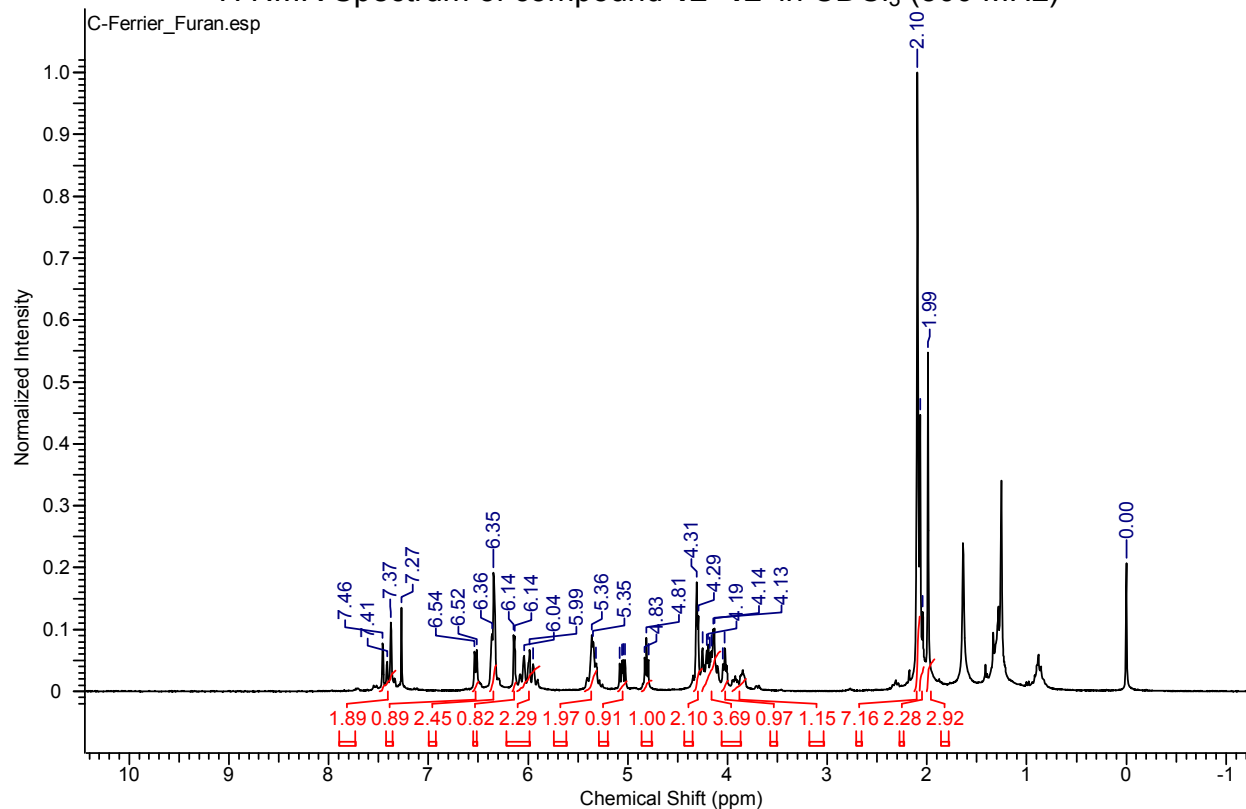

<sup>13</sup>C NMR Spectrum of compound **12+12'** in CDCl<sub>3</sub> (75 MHz)

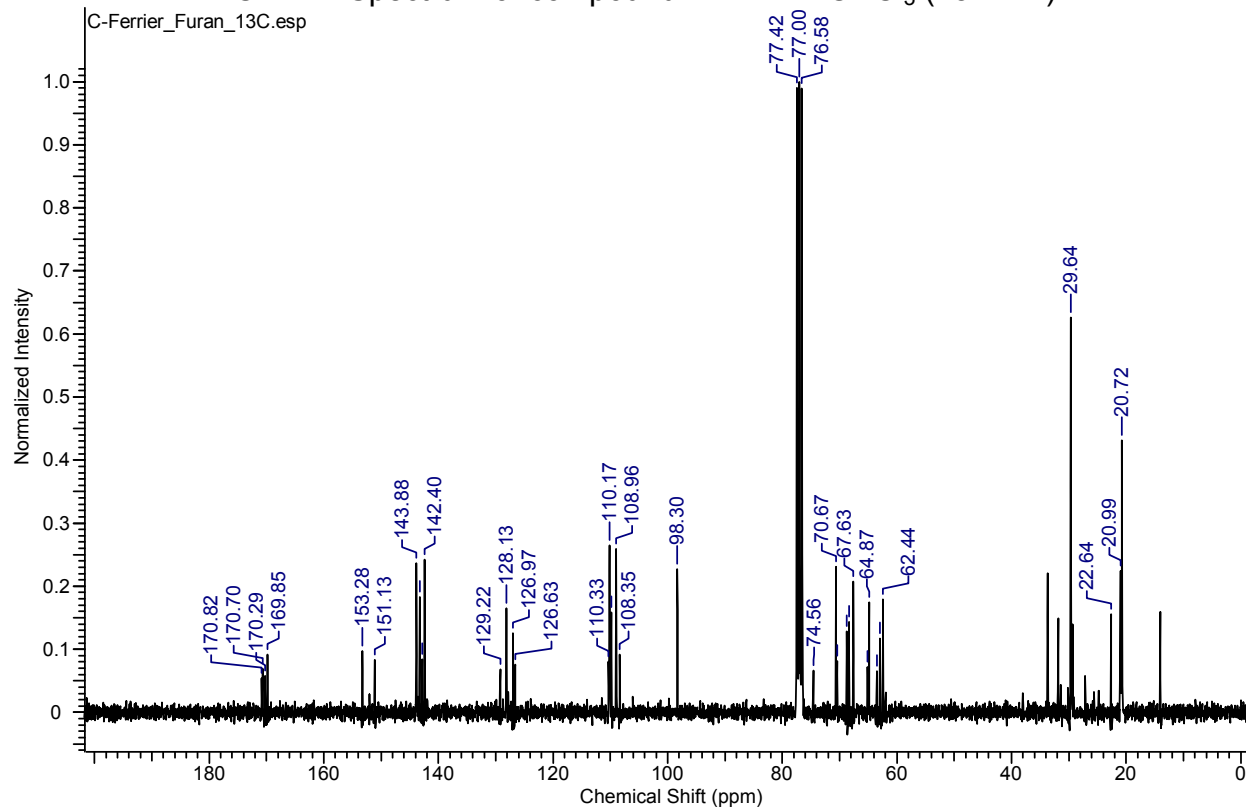

# <sup>1</sup>H NMR Spectrum of compound **13** in CDCl<sub>3</sub> (500 MHz)

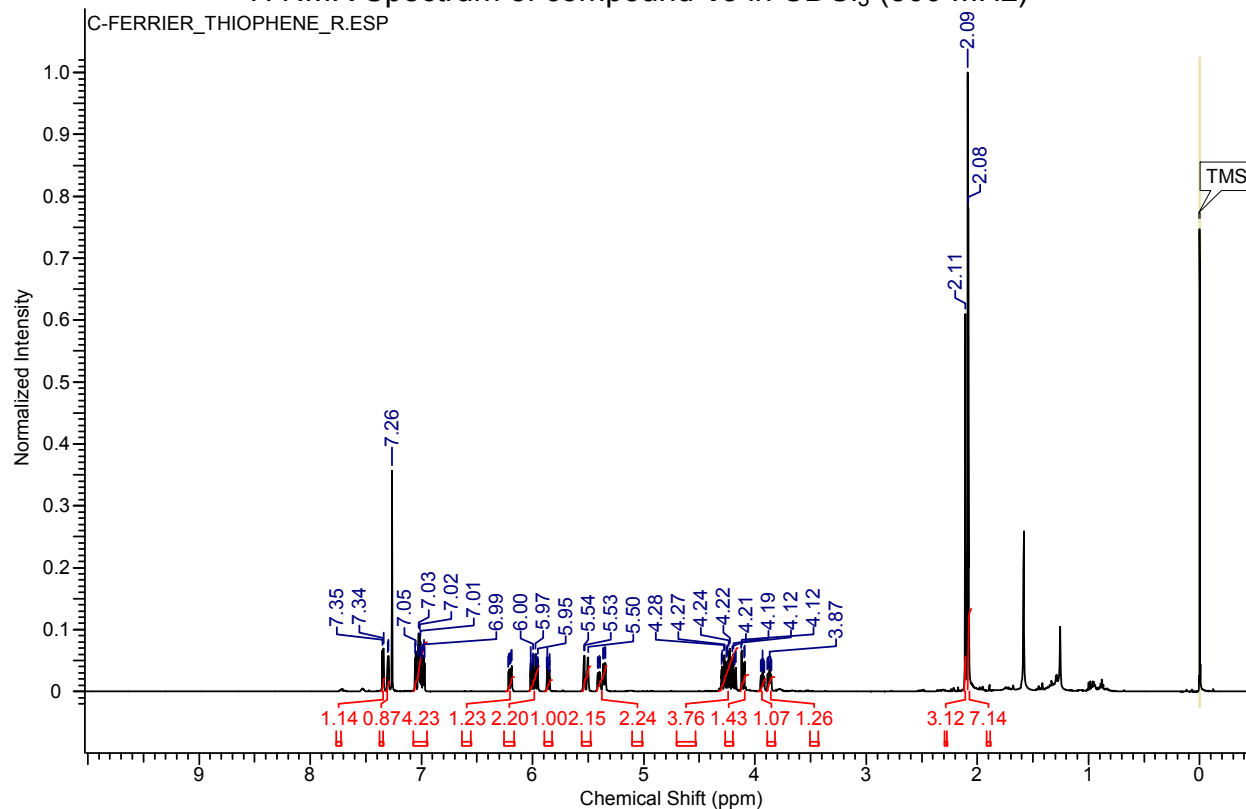

# <sup>13</sup>C NMR Spectrum of compound **13** in CDCl<sub>3</sub> (125 MHz)

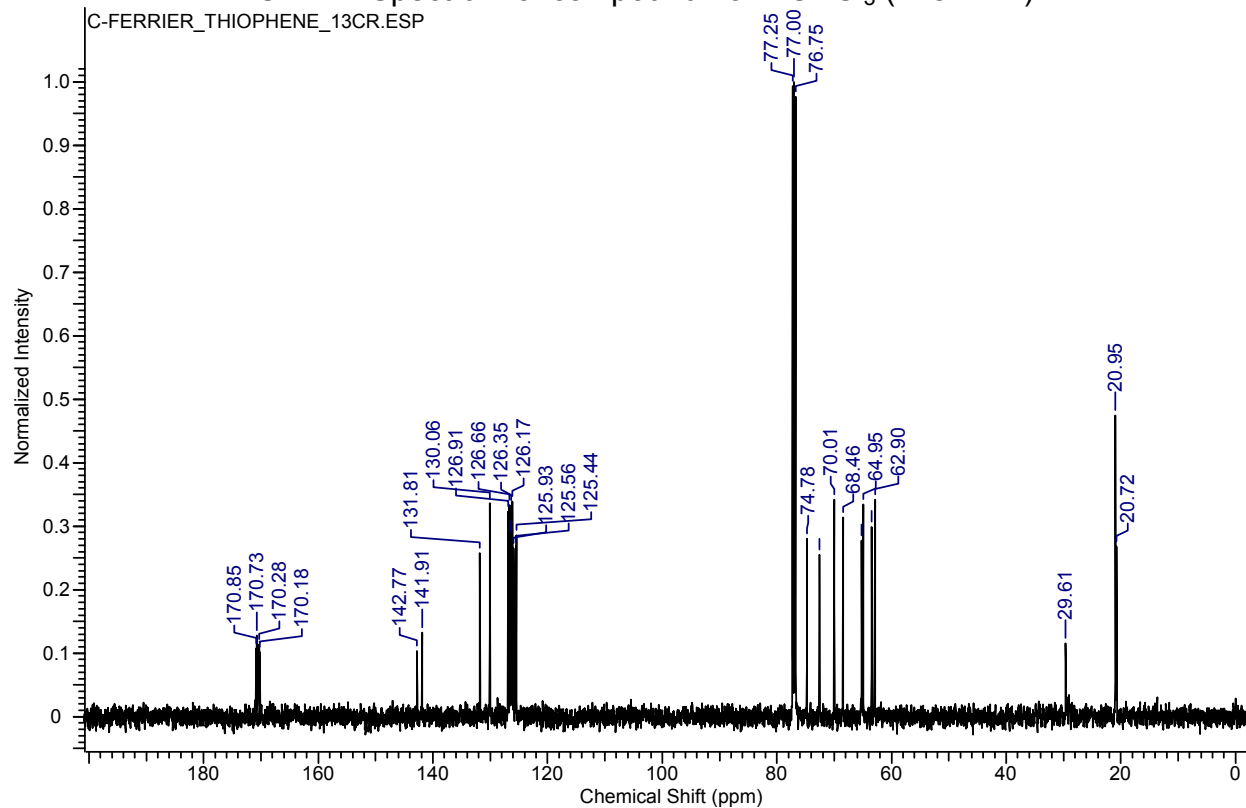

# <sup>1</sup>H NMR Spectrum of compound **14** in CDCl<sub>3</sub> (500 MHz)

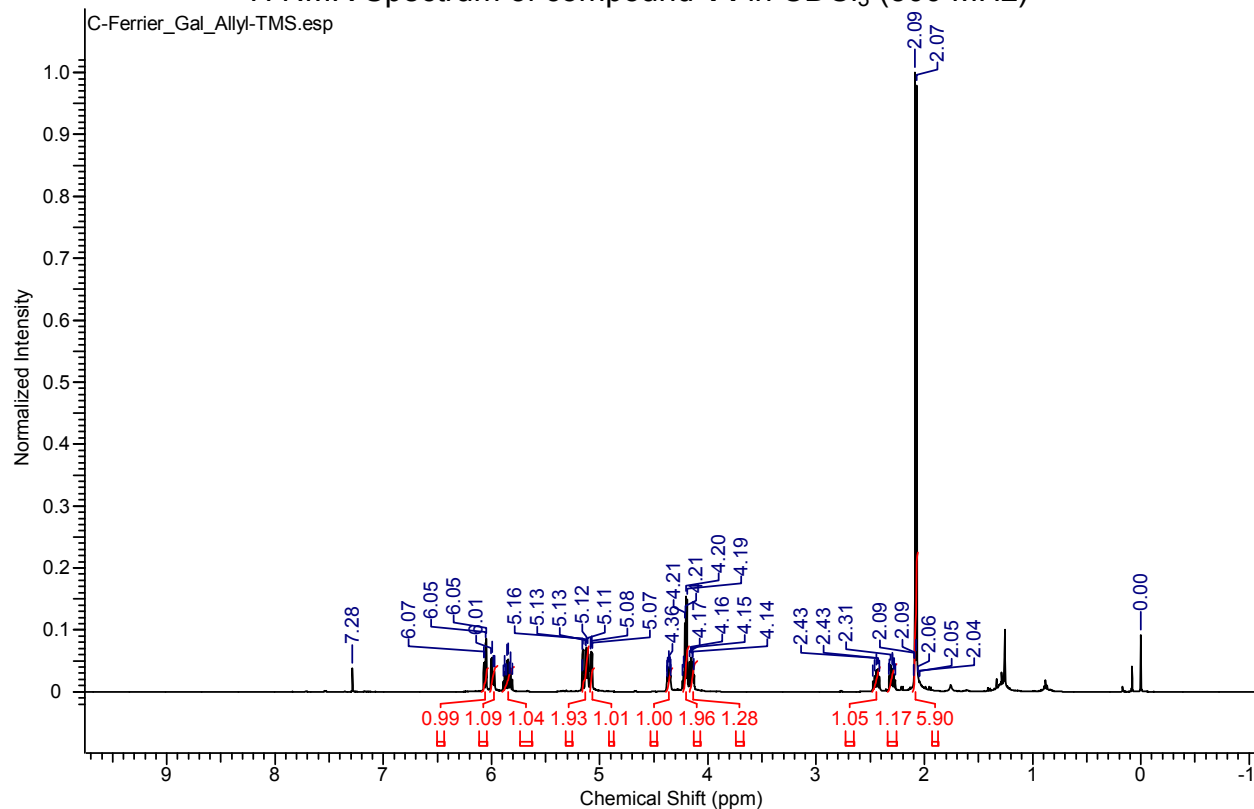

# <sup>13</sup>C NMR Spectrum of compound **14** in CDCl<sub>3</sub> (125 MHz)

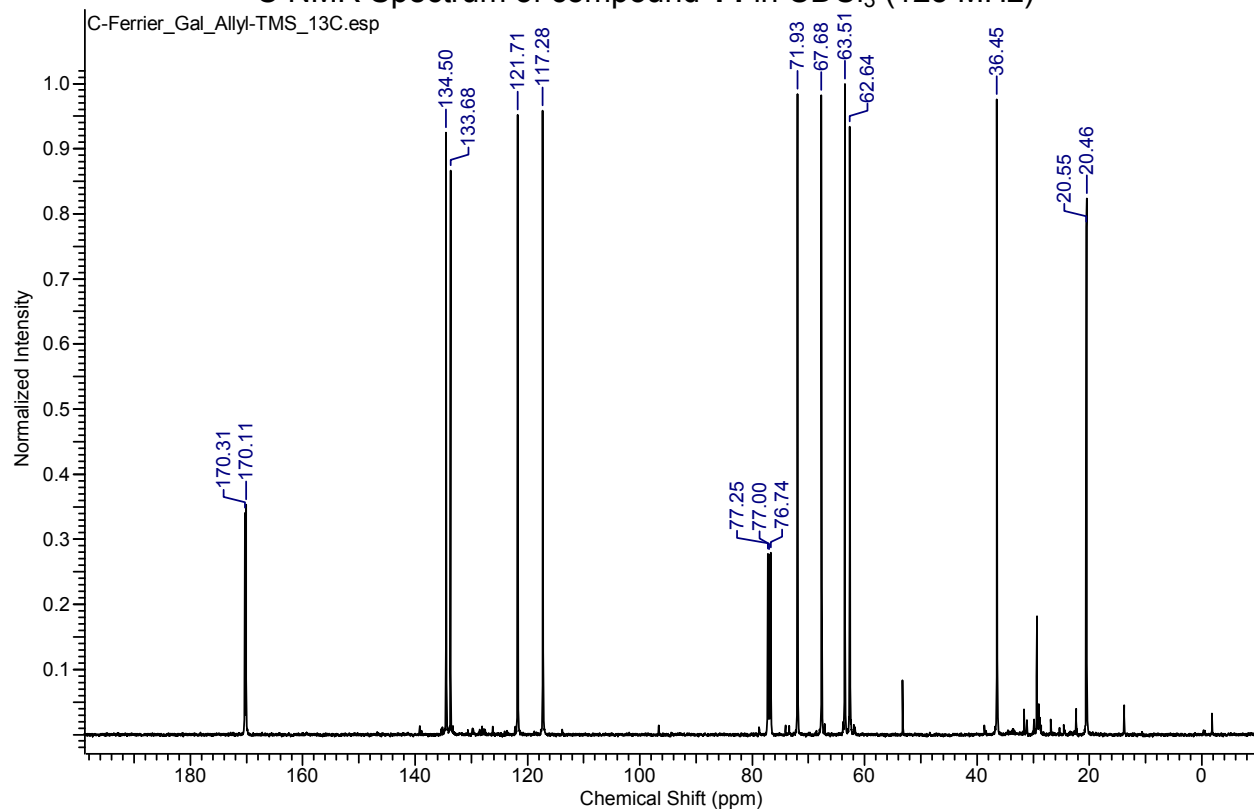



# <sup>1</sup>H NMR Spectrum of compound **15** in CDCl<sub>3</sub> (500 MHz)

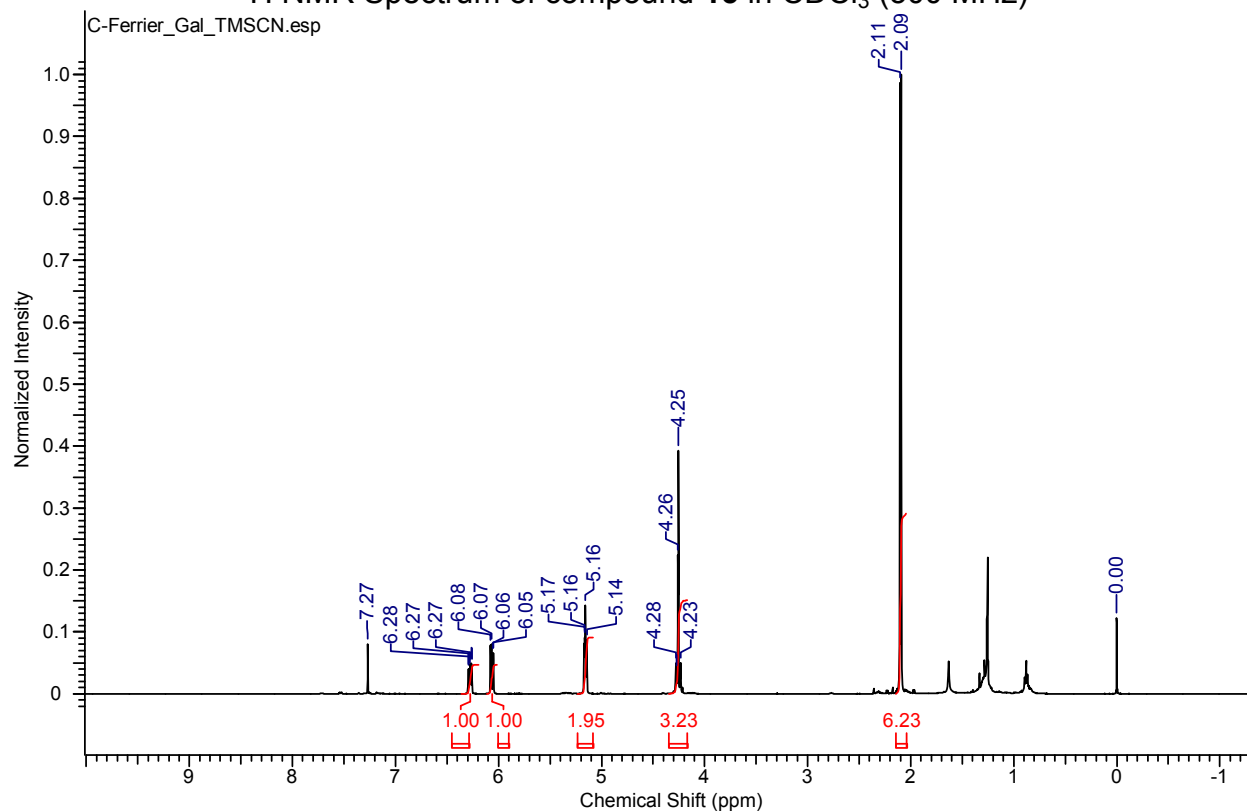

# <sup>13</sup>C NMR Spectrum of compound **15** in CDCl<sub>3</sub> (75 MHz)

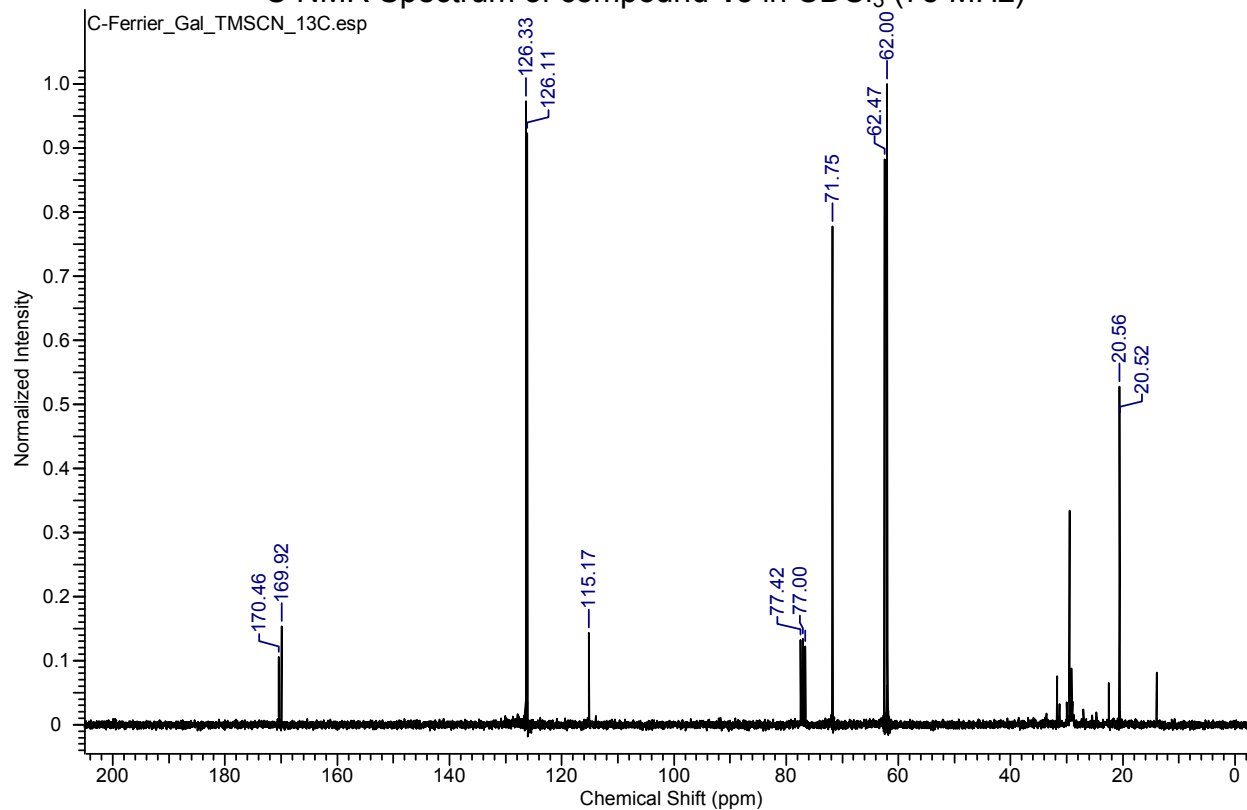

# <sup>1</sup>H NMR Spectrum of compound **16** in CDCl<sub>3</sub> (500 MHz)

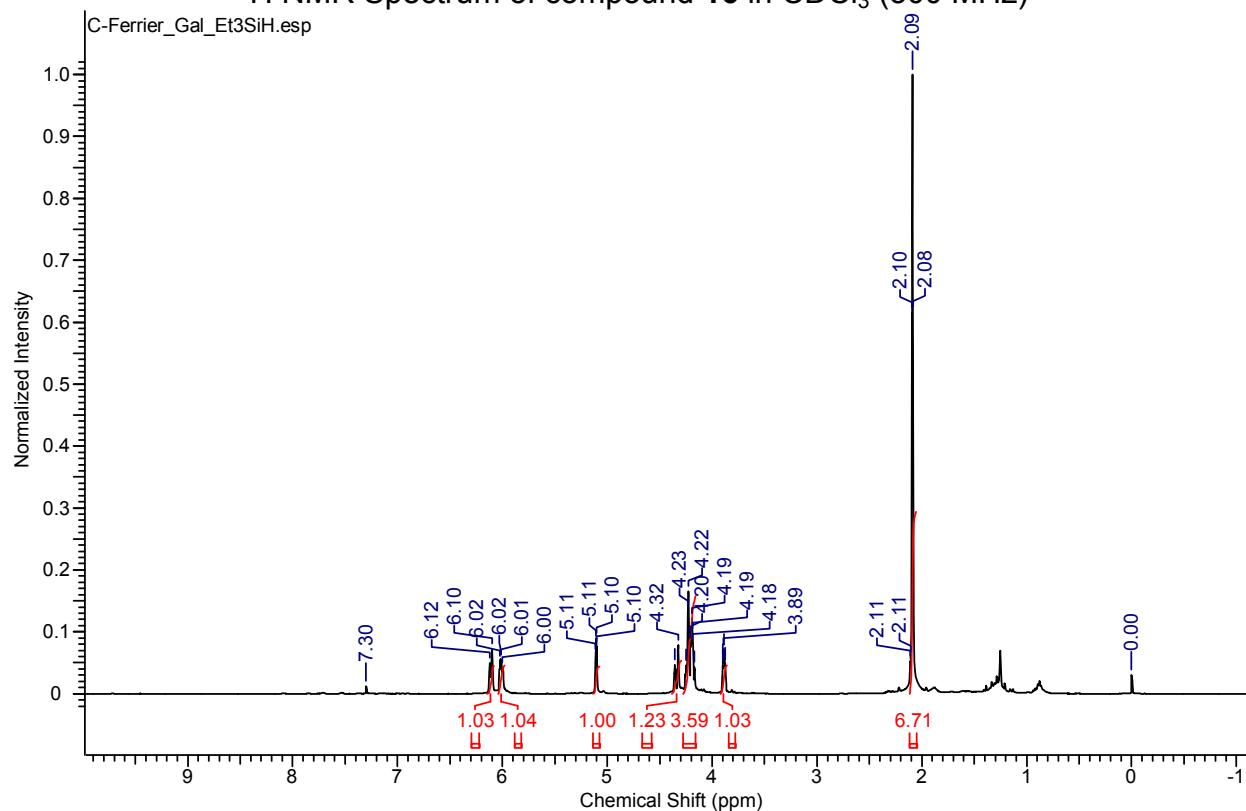

# <sup>13</sup>C NMR Spectrum of compound **16** in CDCl<sub>3</sub> (125 MHz)

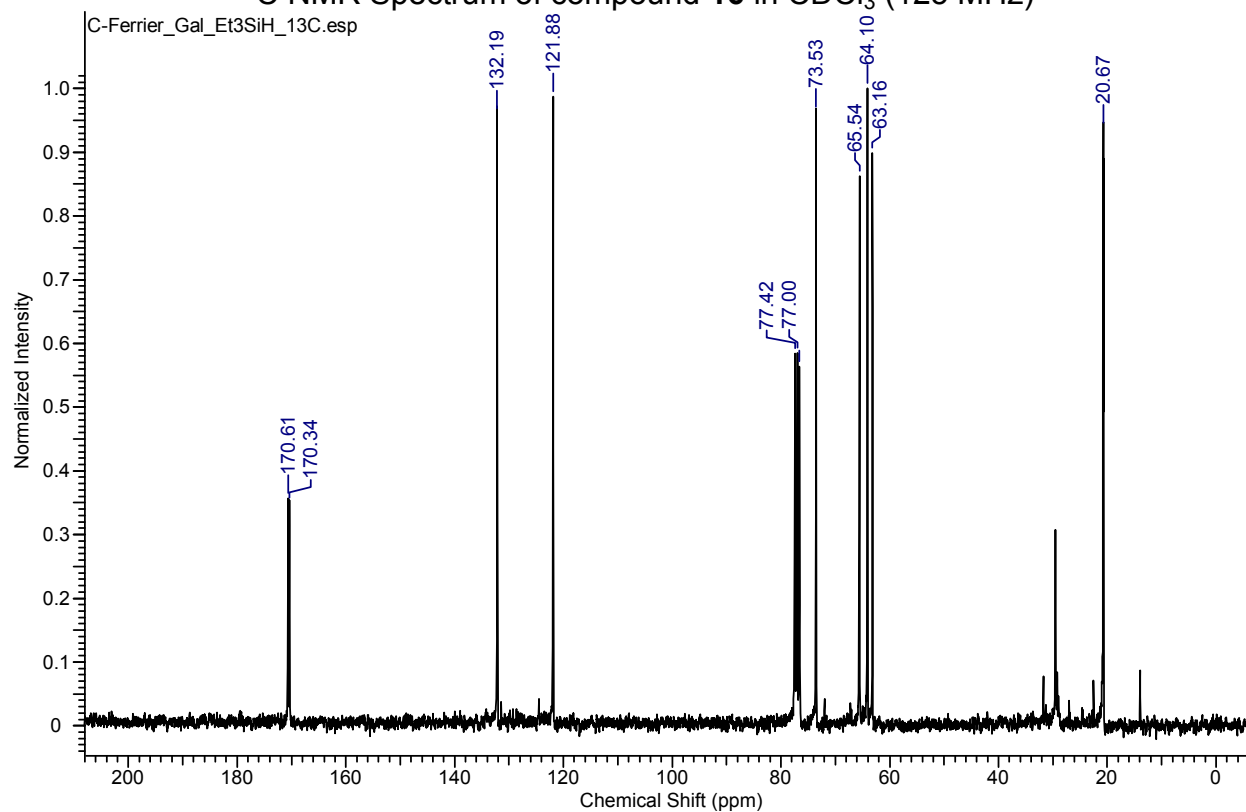

### <sup>1</sup>H NMR Spectrum of compound **17** in CDCl<sub>3</sub> (500 MHz)

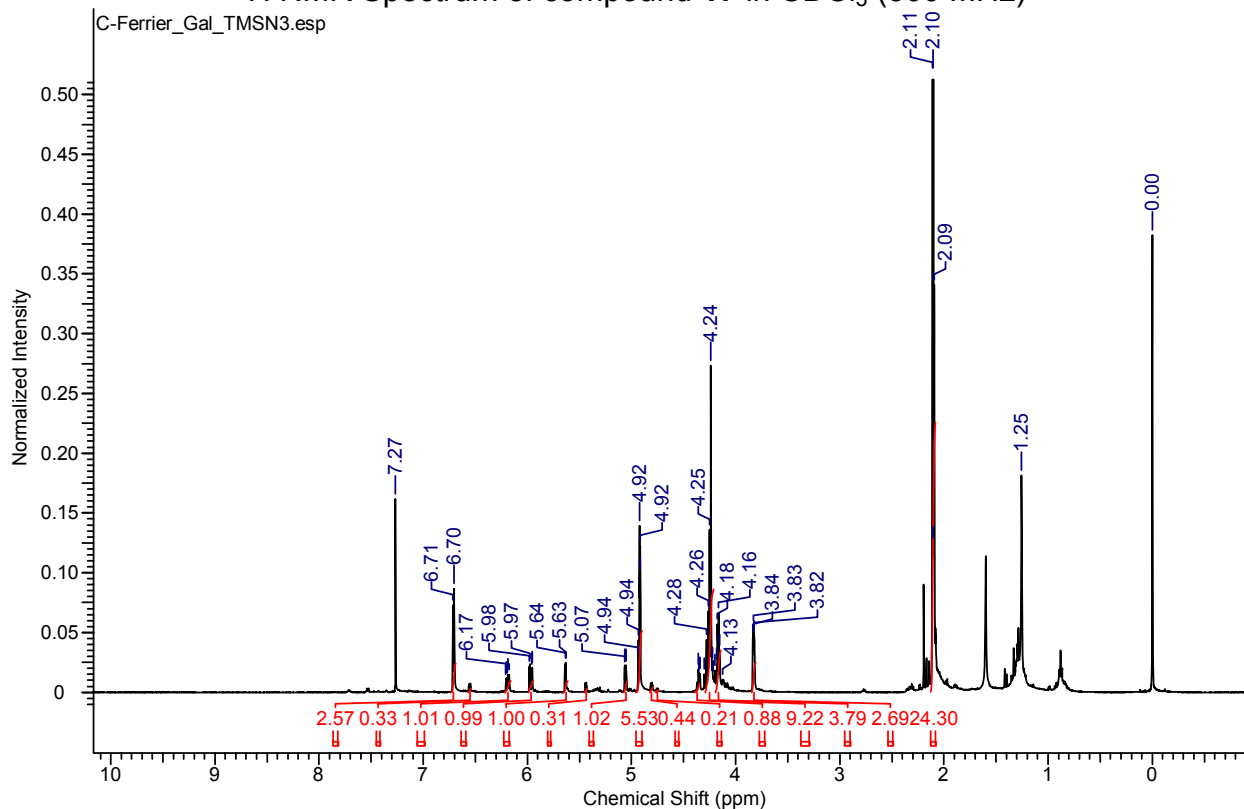

### <sup>13</sup>C NMR Spectrum of compound **17** in CDCl<sub>3</sub> (75 MHz)

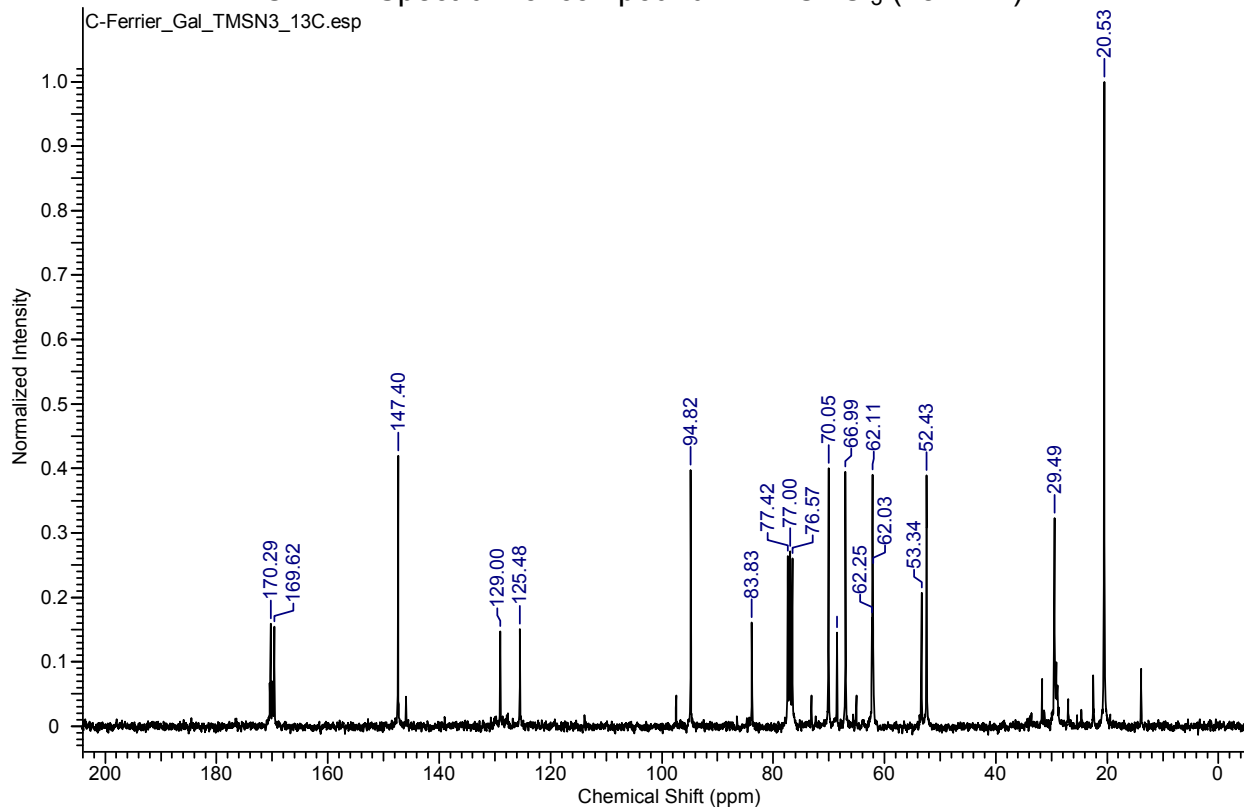

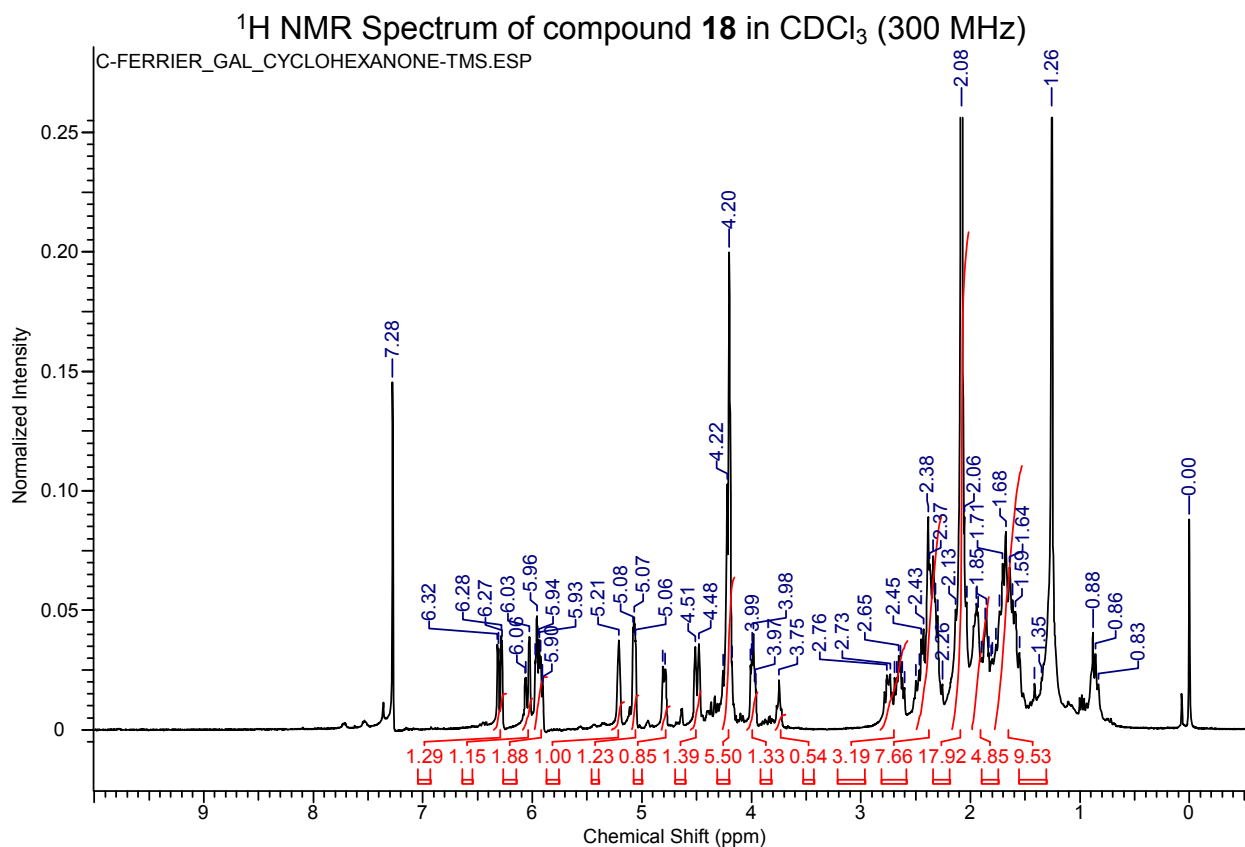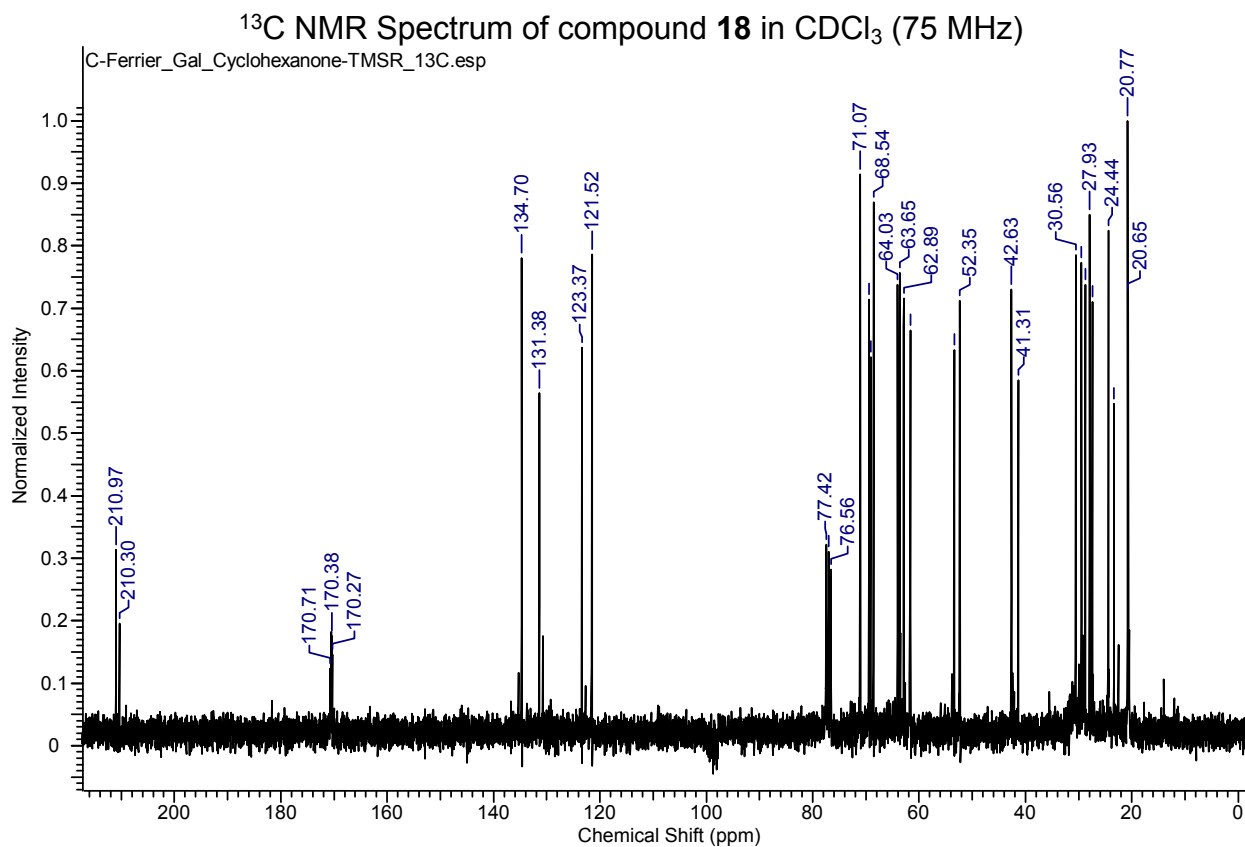

### <sup>1</sup>H NMR Spectrum of compound **19** in CDCl<sub>3</sub> (300 MHz)

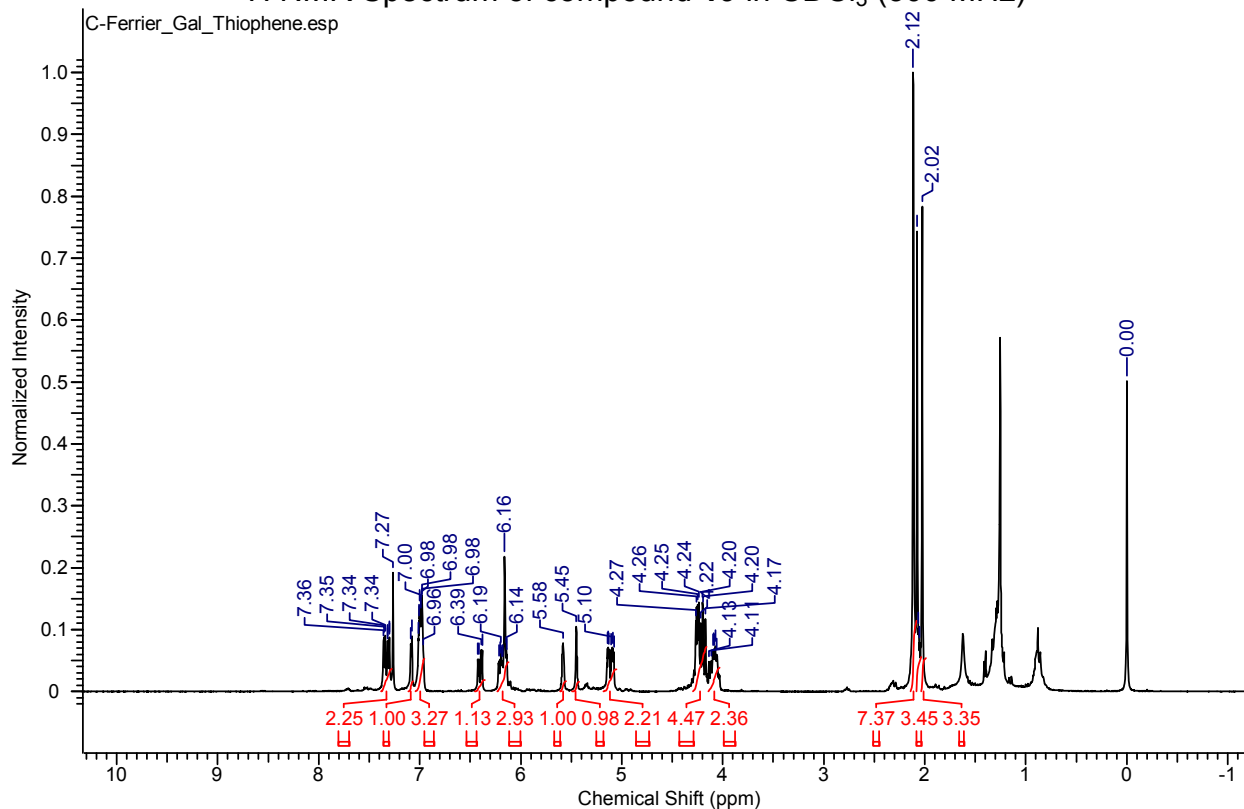

### <sup>13</sup>C NMR Spectrum of compound **19** in CDCl<sub>3</sub> (75 MHz)

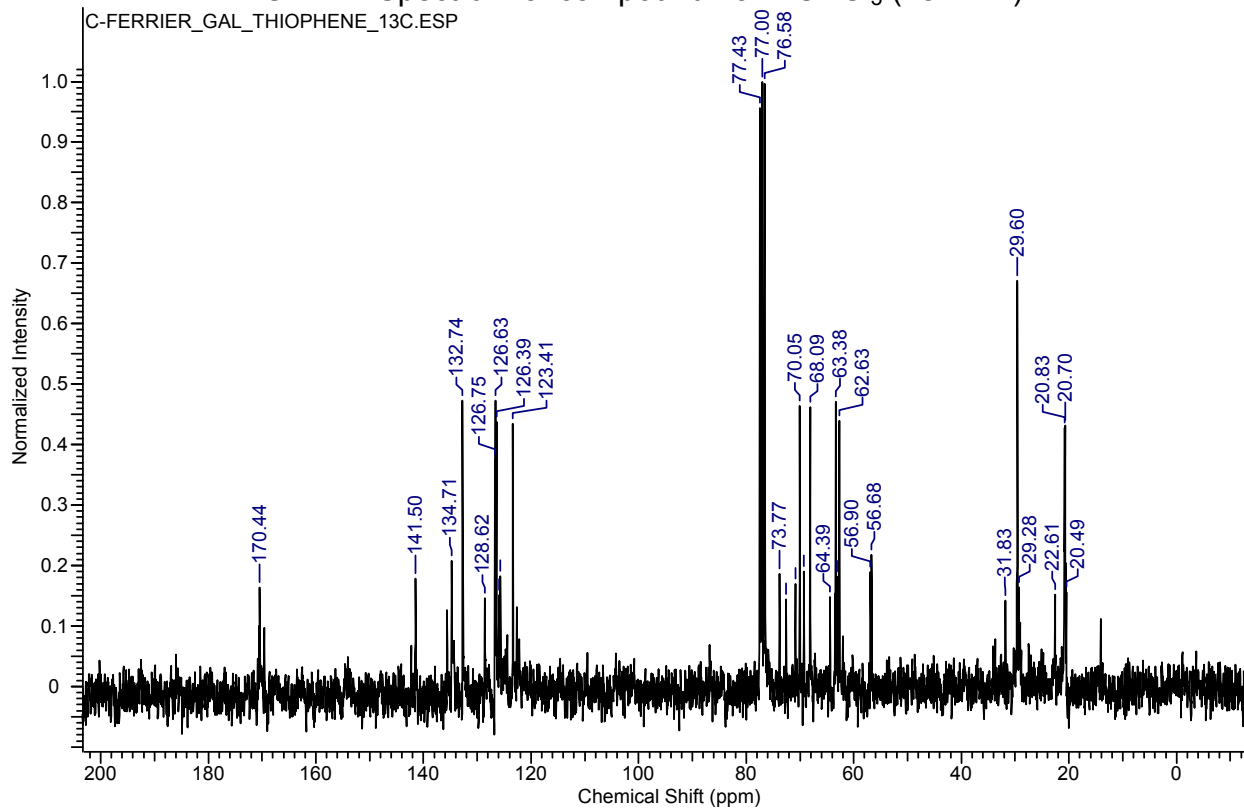

### <sup>1</sup>H NMR Spectrum of compound **20** in CDCl<sub>3</sub> (300 MHz)

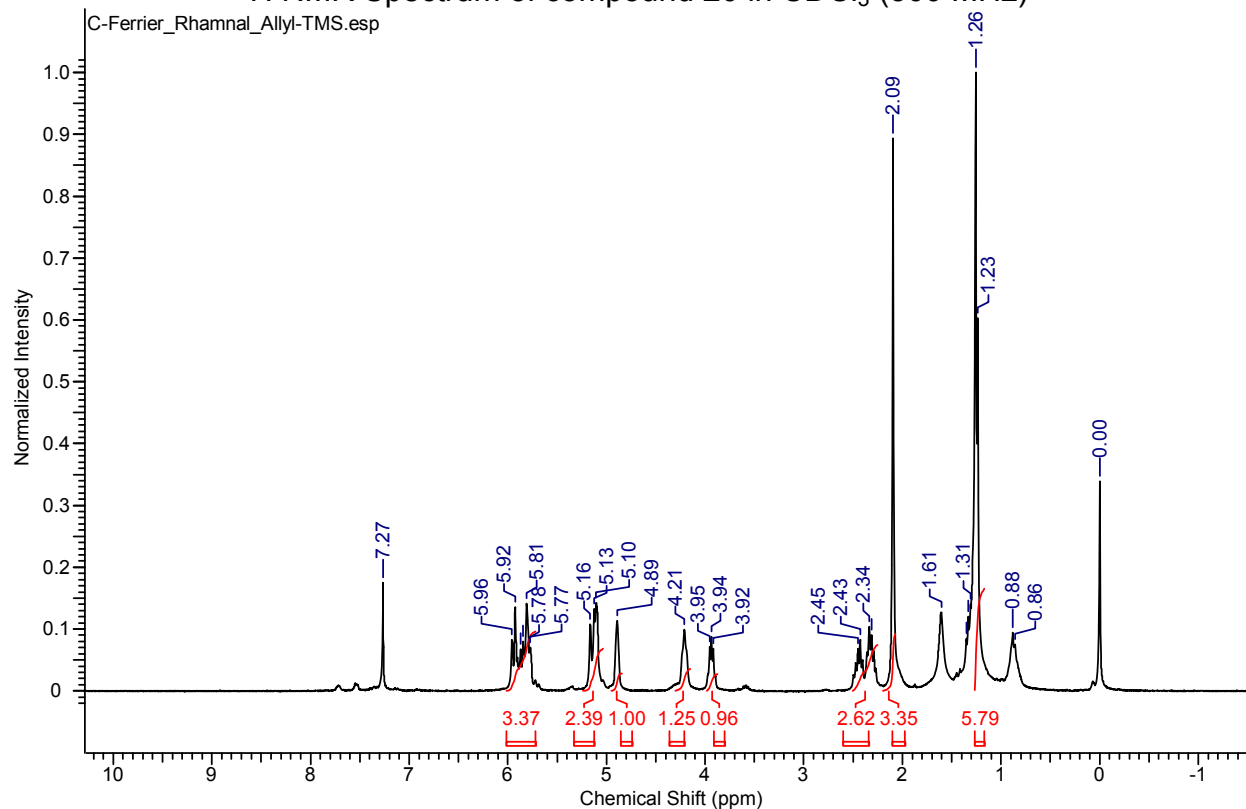

### <sup>13</sup>C NMR Spectrum of compound **20** in CDCl<sub>3</sub> (75 MHz)

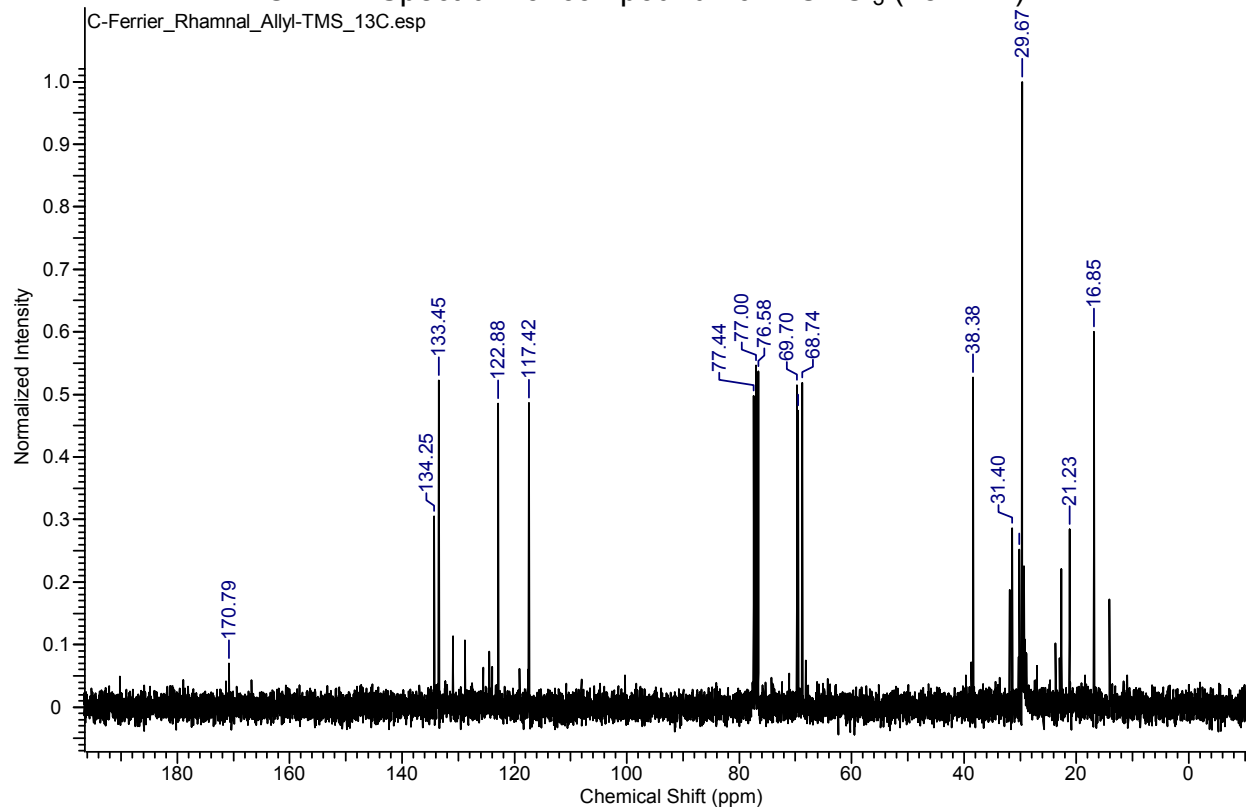

# <sup>1</sup>H NMR Spectrum of compound **21** in CDCl<sub>3</sub> (300 MHz)

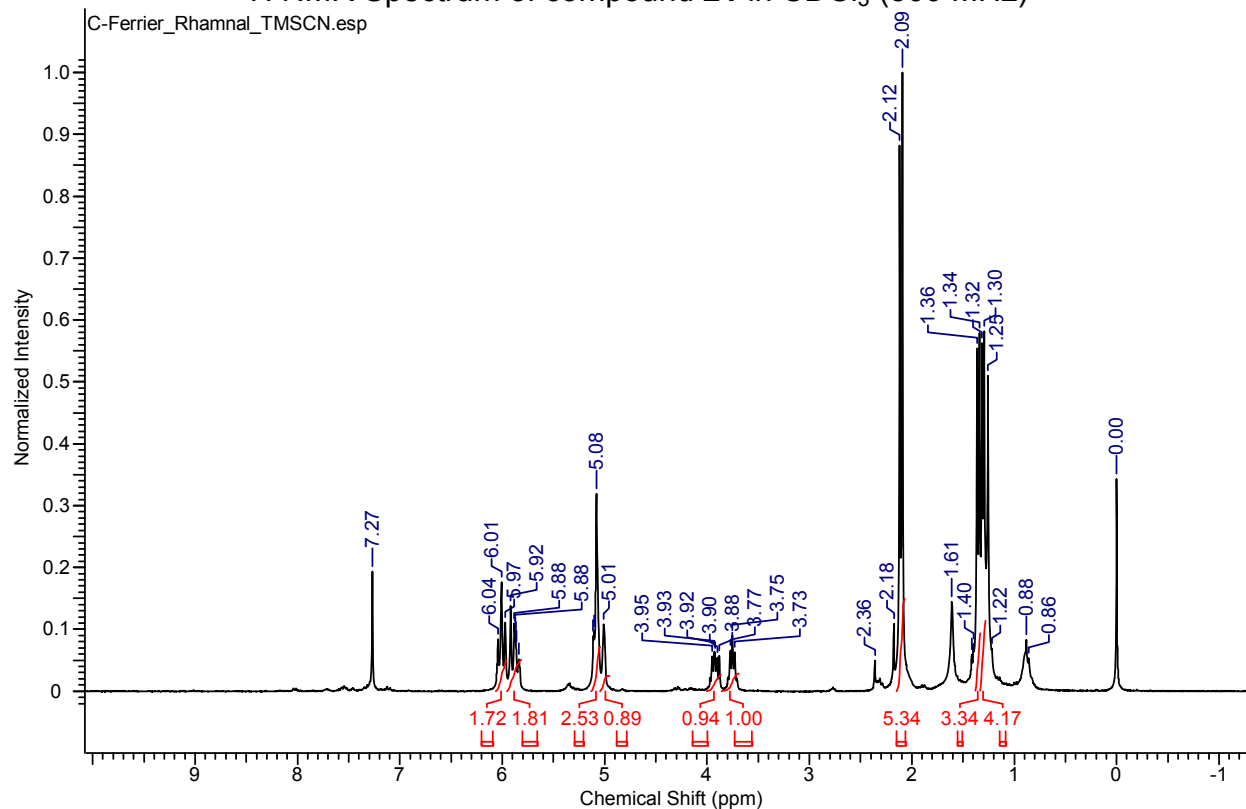

# <sup>13</sup>C NMR Spectrum of compound **21** in CDCl<sub>3</sub> (125 MHz)

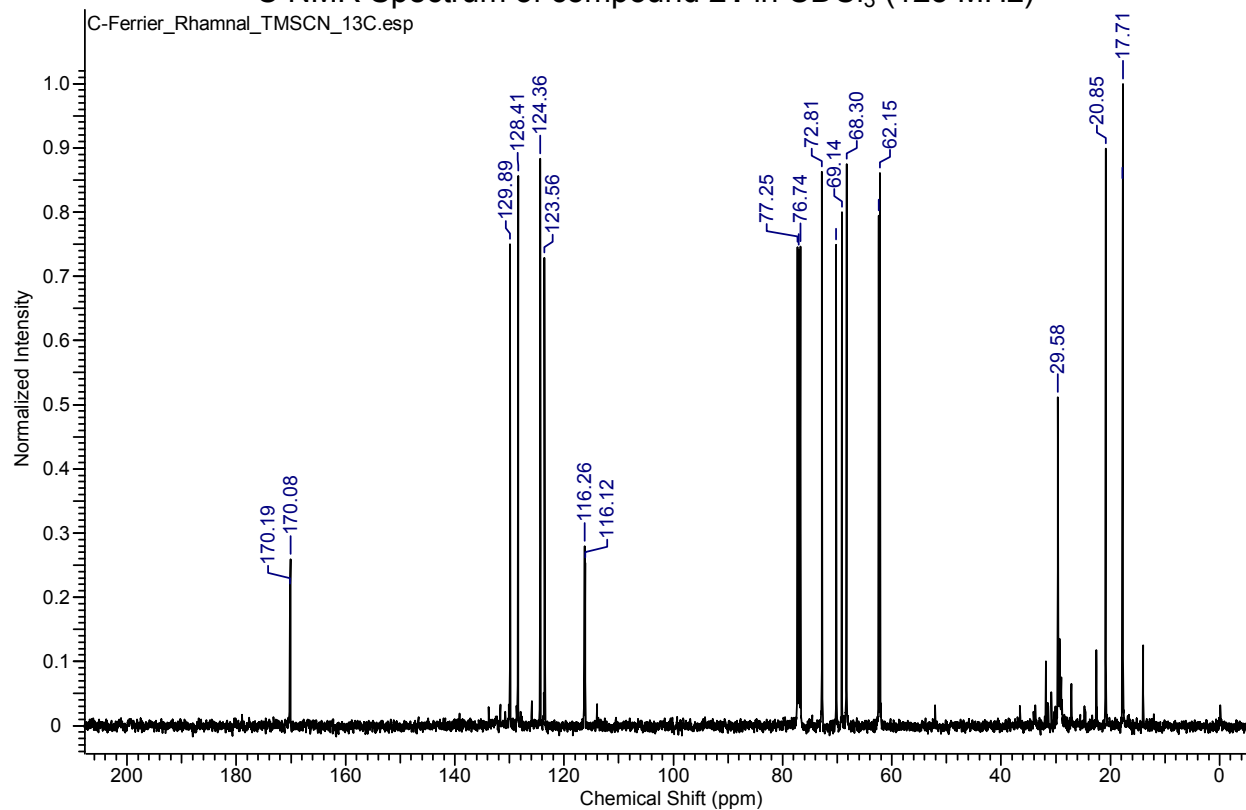

# <sup>1</sup>H NMR Spectrum of compound **22** in CDCl<sub>3</sub> (500 MHz)

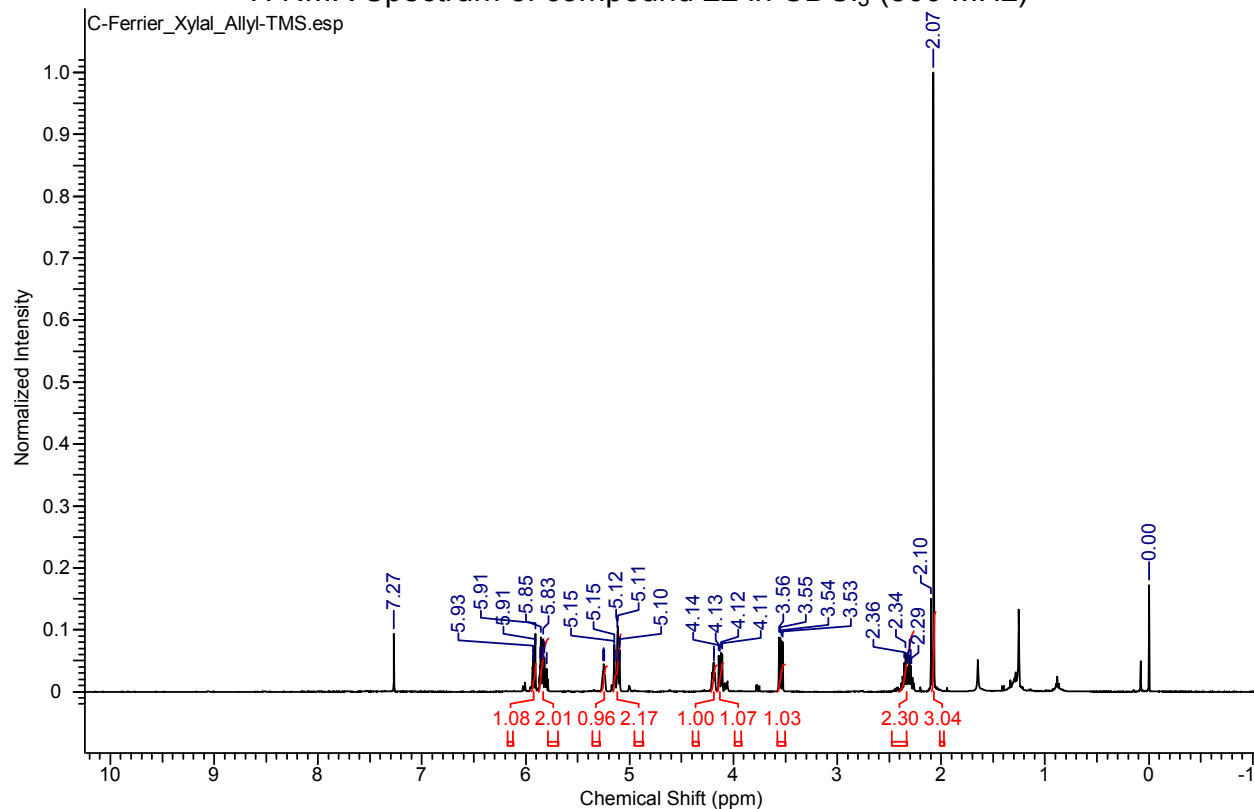

# <sup>13</sup>C NMR Spectrum of compound **22** in CDCl<sub>3</sub> (125 MHz)

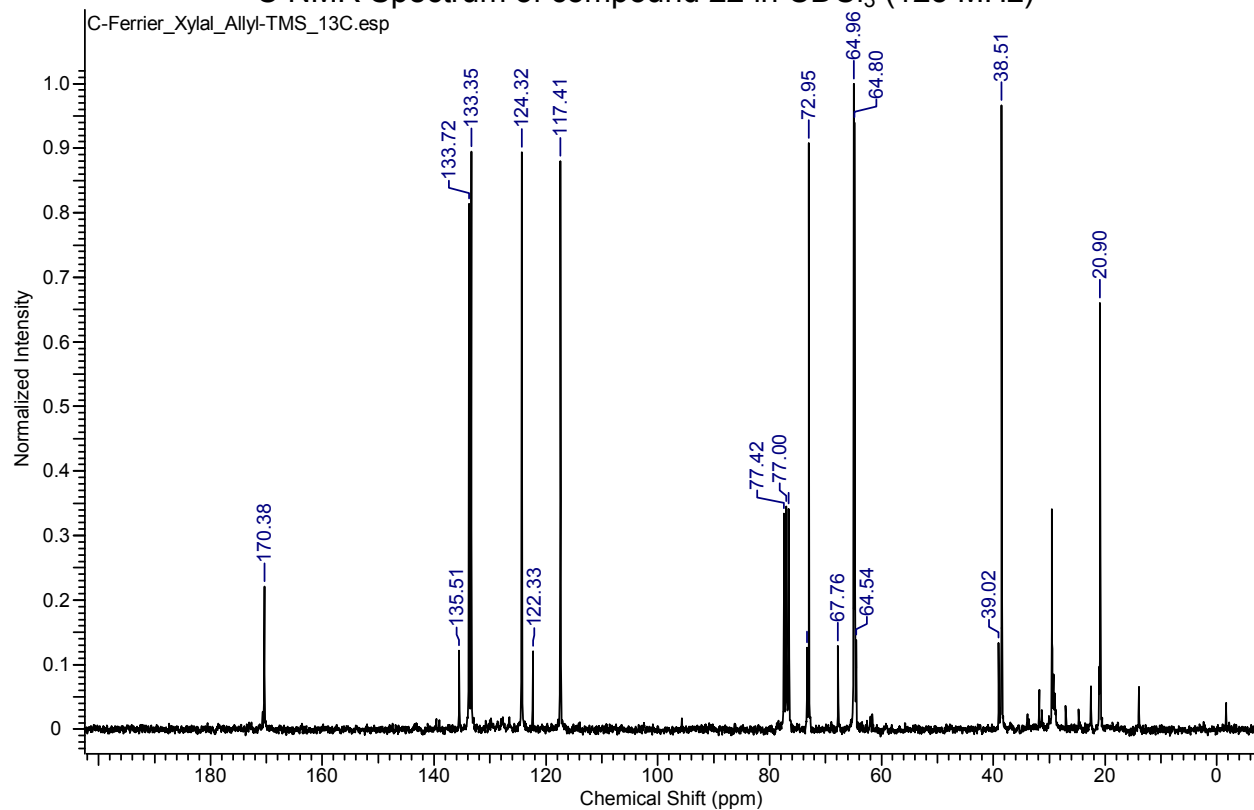



### <sup>1</sup>H NMR Spectrum of compound **23** in CDCl<sub>3</sub> (500 MHz)

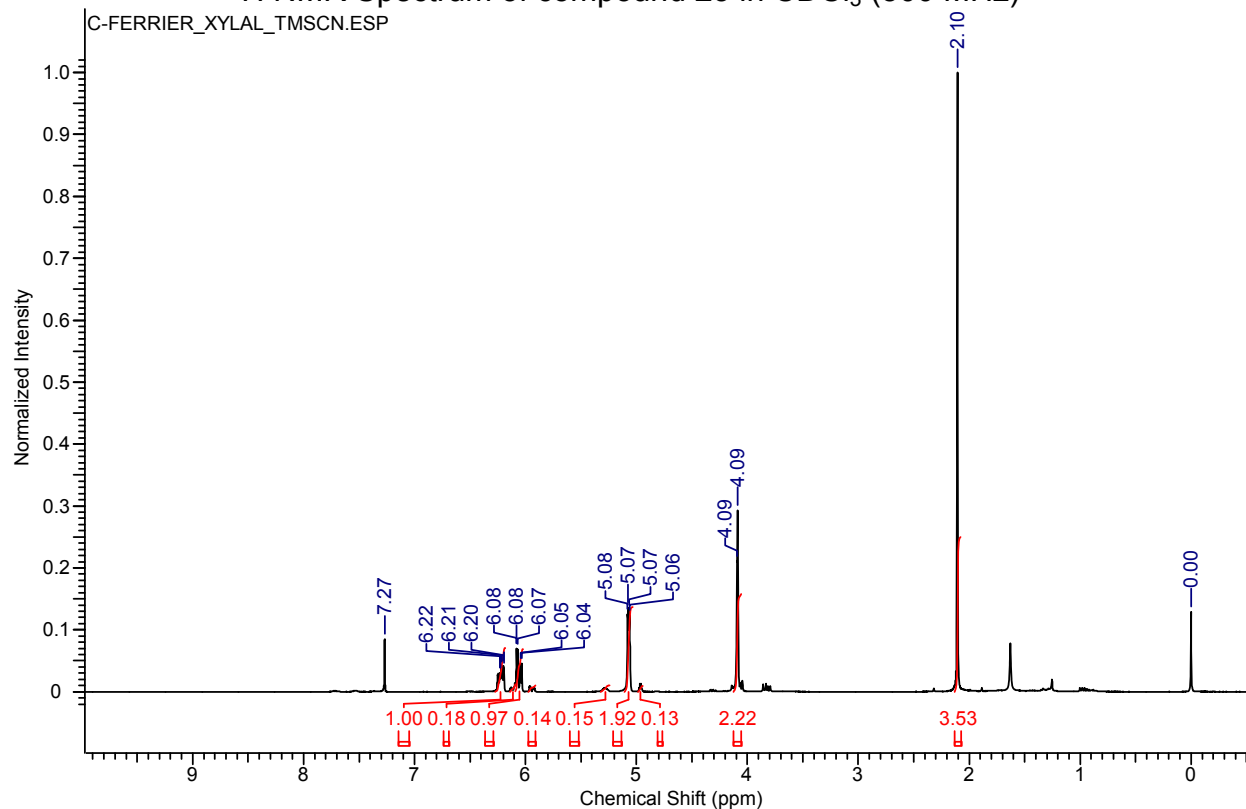

### <sup>13</sup>C NMR Spectrum of compound **23** in CDCl<sub>3</sub> (75 MHz)

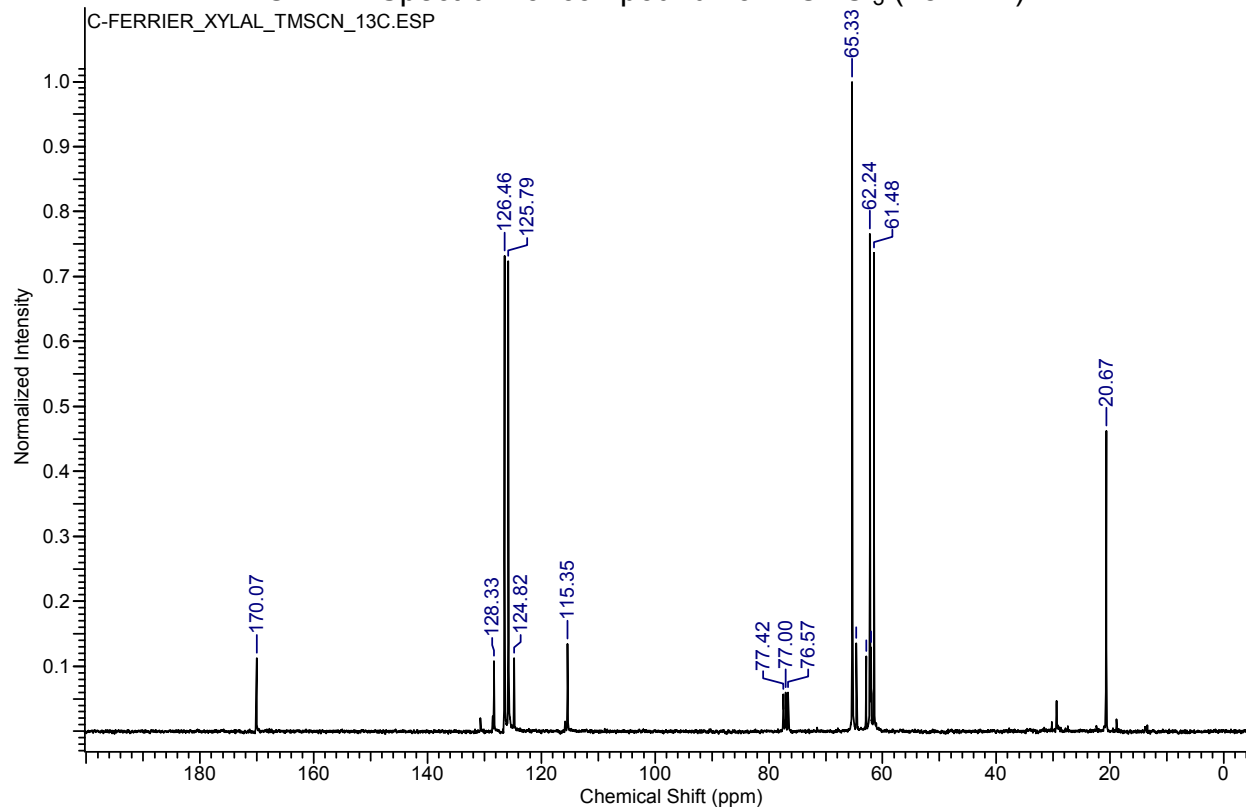

# <sup>1</sup>H NMR Spectrum of compound **24** in CDCl<sub>3</sub> (300 MHz)

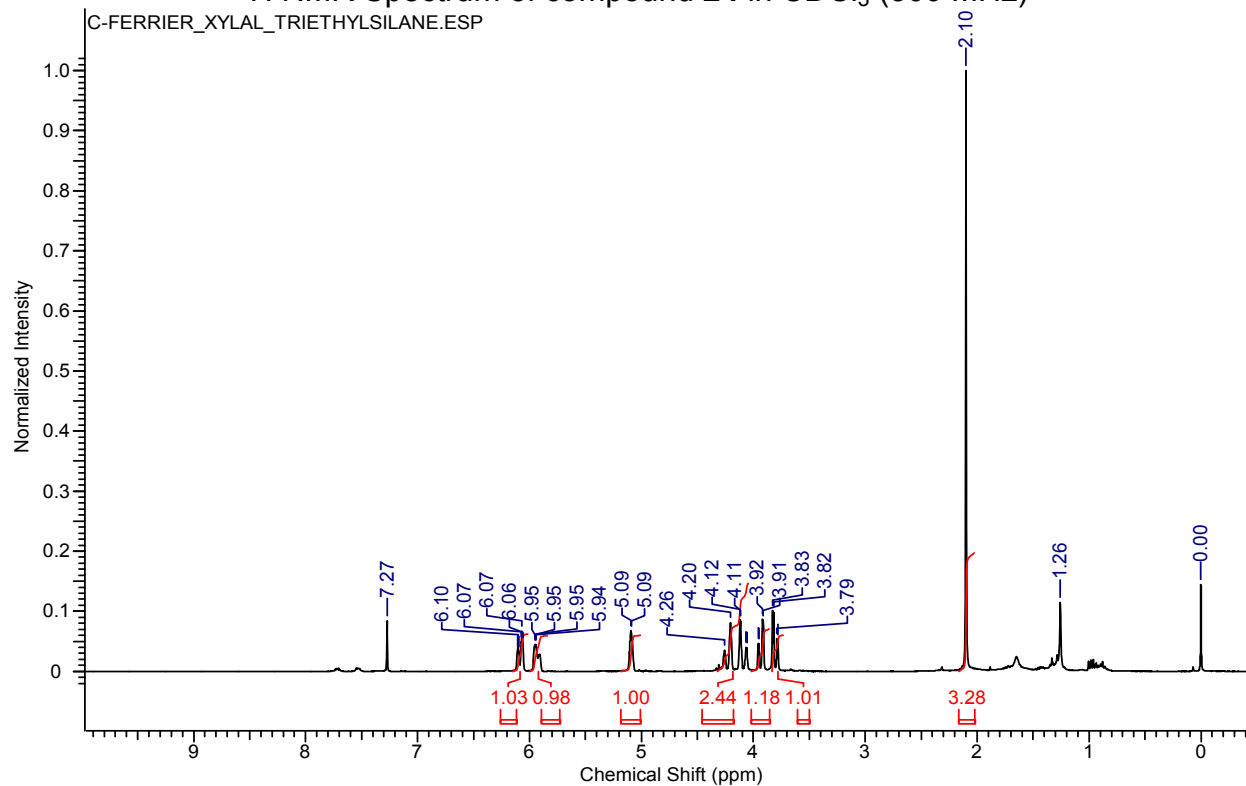

# <sup>13</sup>C NMR Spectrum of compound **24** in CDCl<sub>3</sub> (75 MHz)

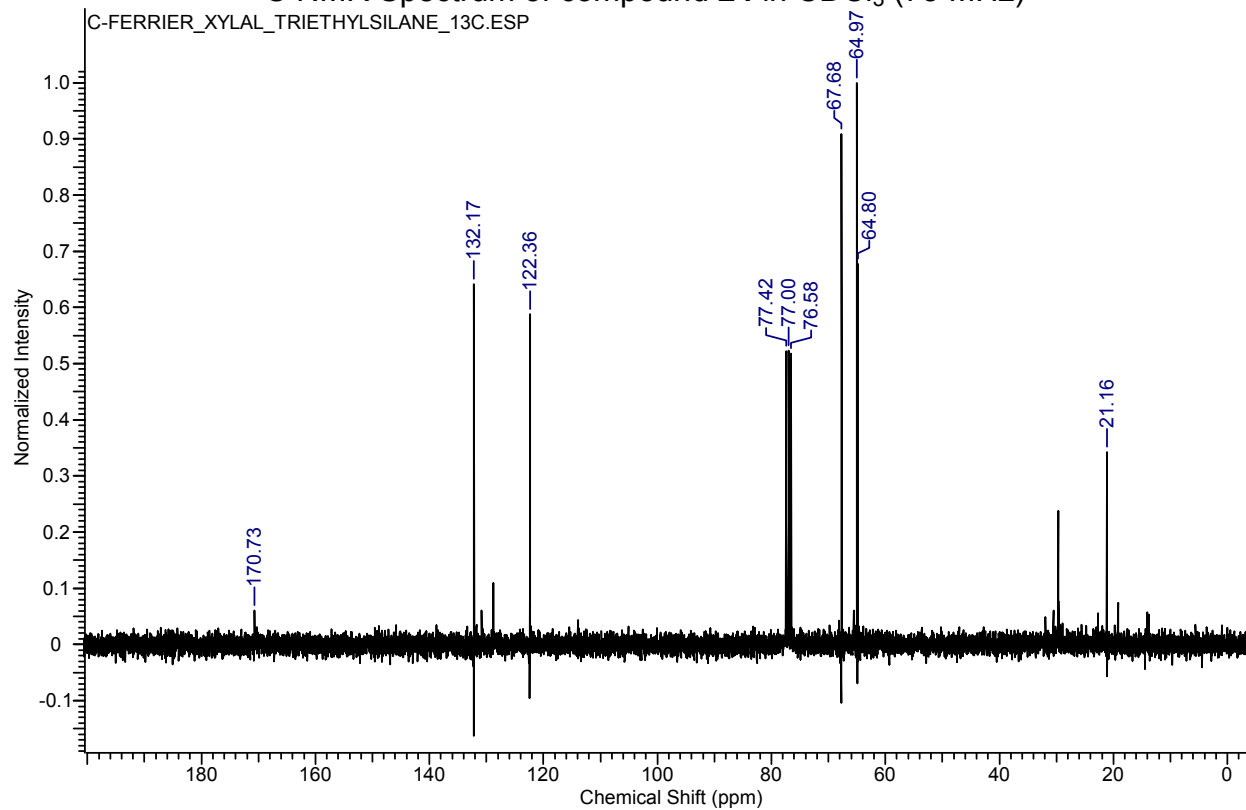

### <sup>1</sup>H NMR Spectrum of compound **25** in CDCl<sub>3</sub> (500 MHz)

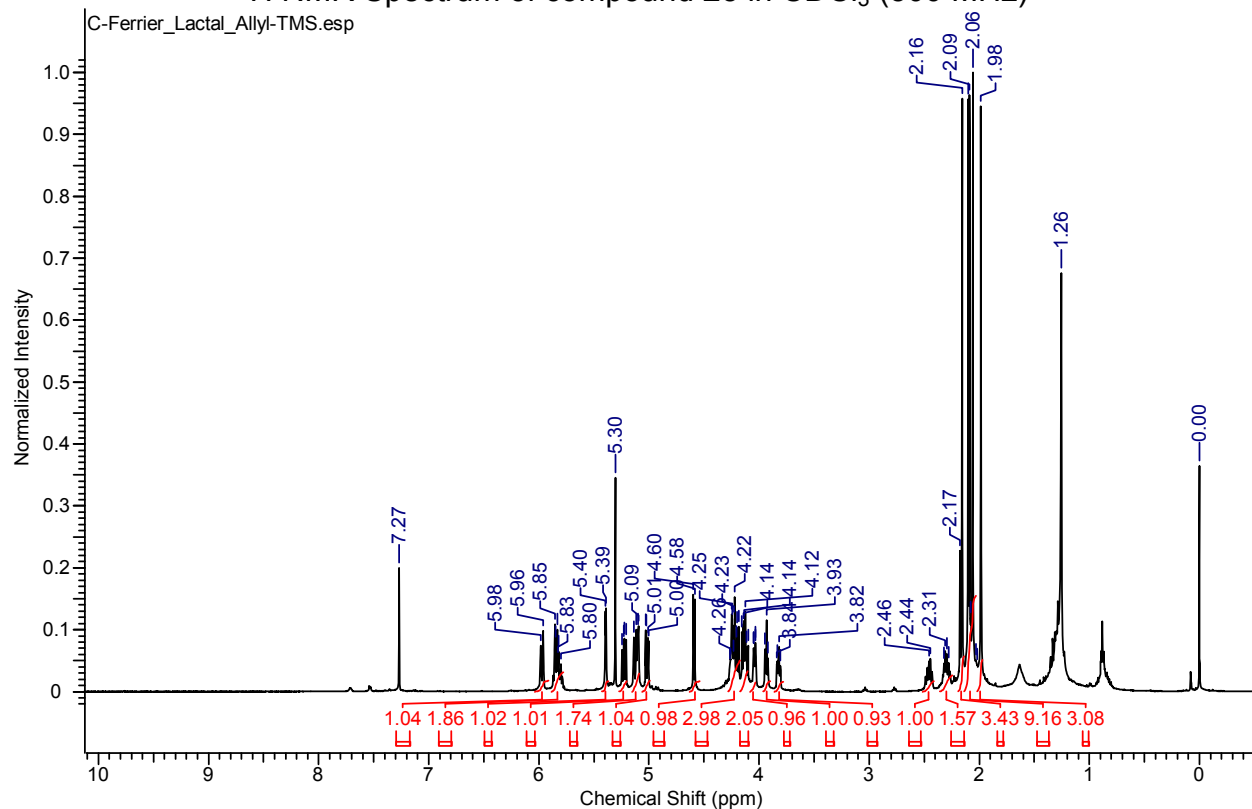

### <sup>13</sup>C NMR Spectrum of compound **25** in CDCl<sub>3</sub> (75 MHz)

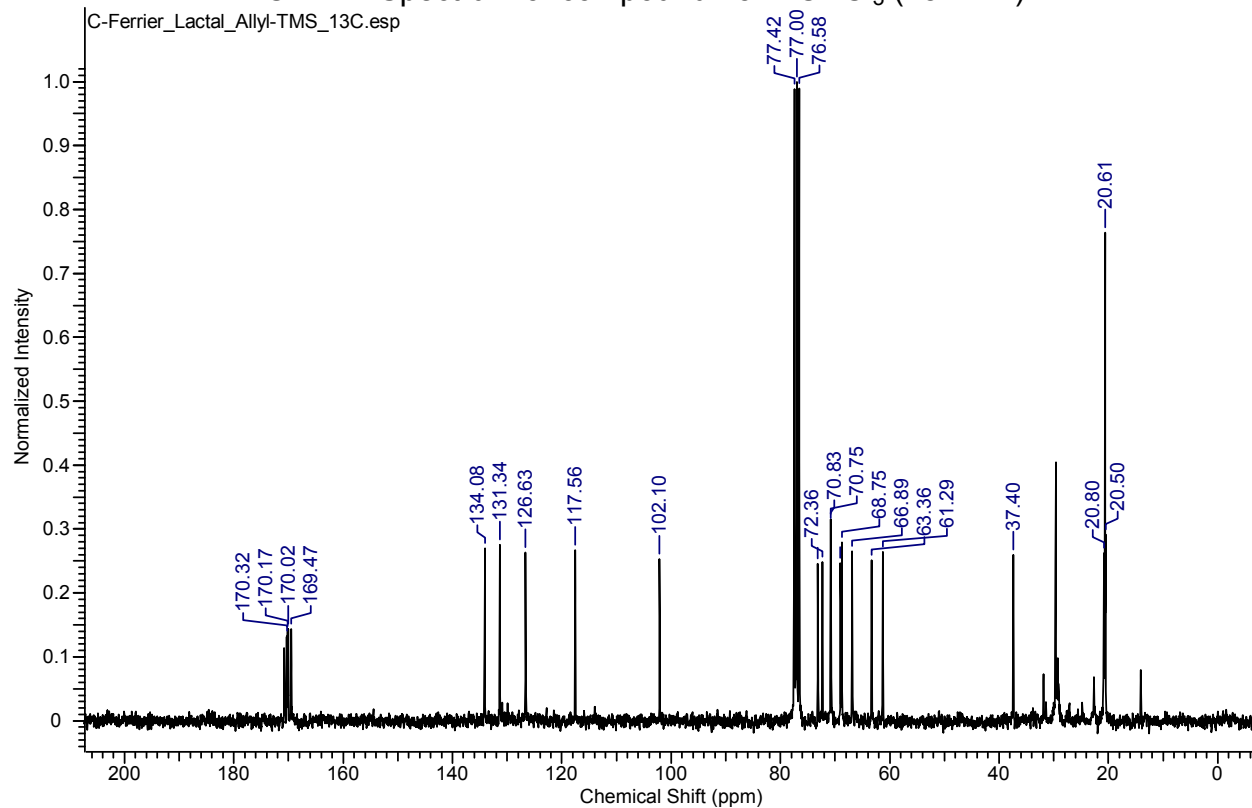

# <sup>1</sup>H NMR Spectrum of compound **26** in CDCl<sub>3</sub> (500 MHz)

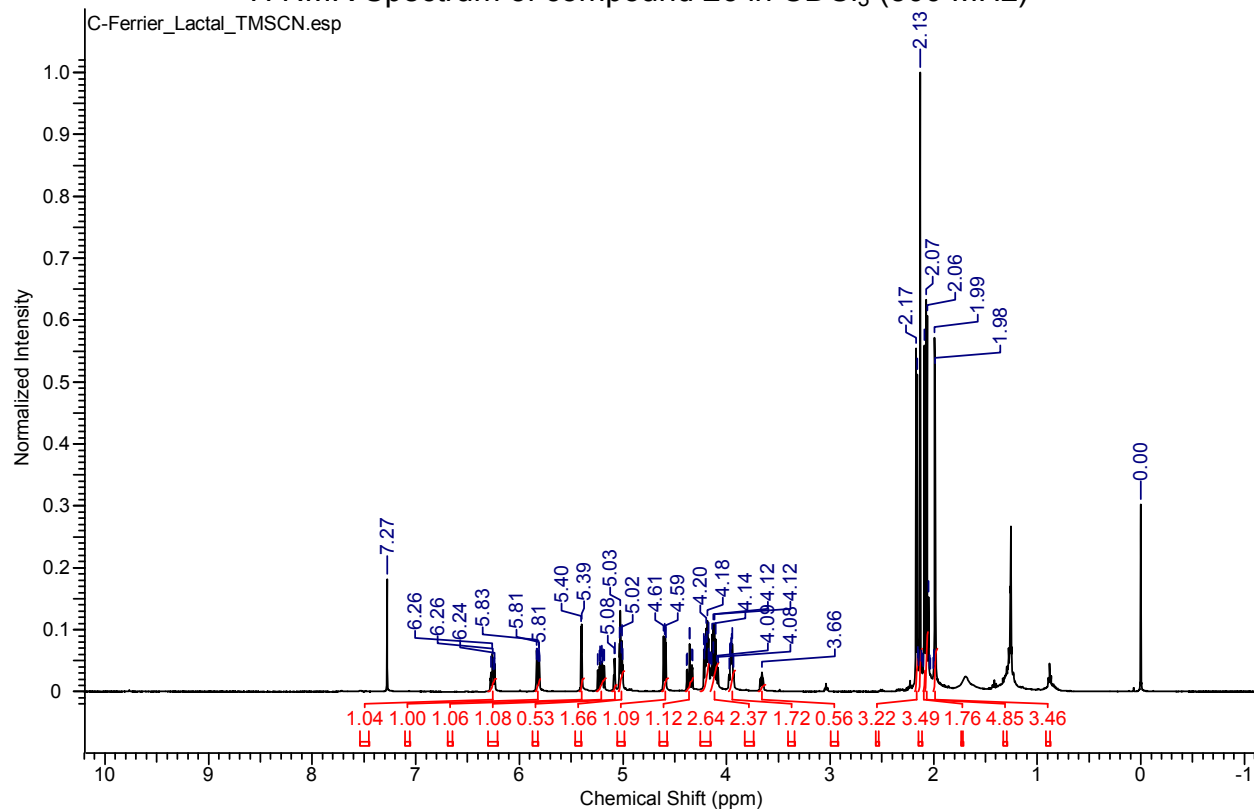

# <sup>13</sup>C NMR Spectrum of compound **26** in CDCl<sub>3</sub> (75 MHz)

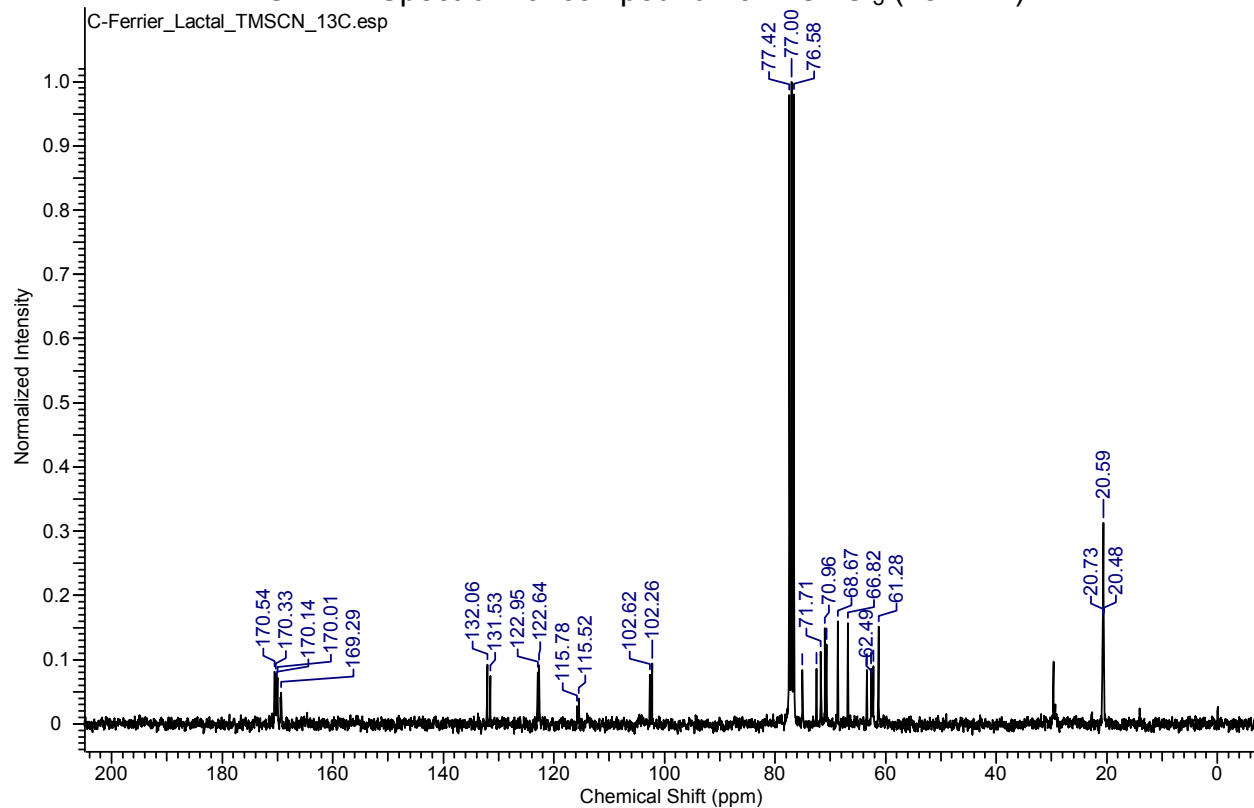

### <sup>1</sup>H NMR Spectrum of compound **27** in CDCl<sub>3</sub> (500 MHz)

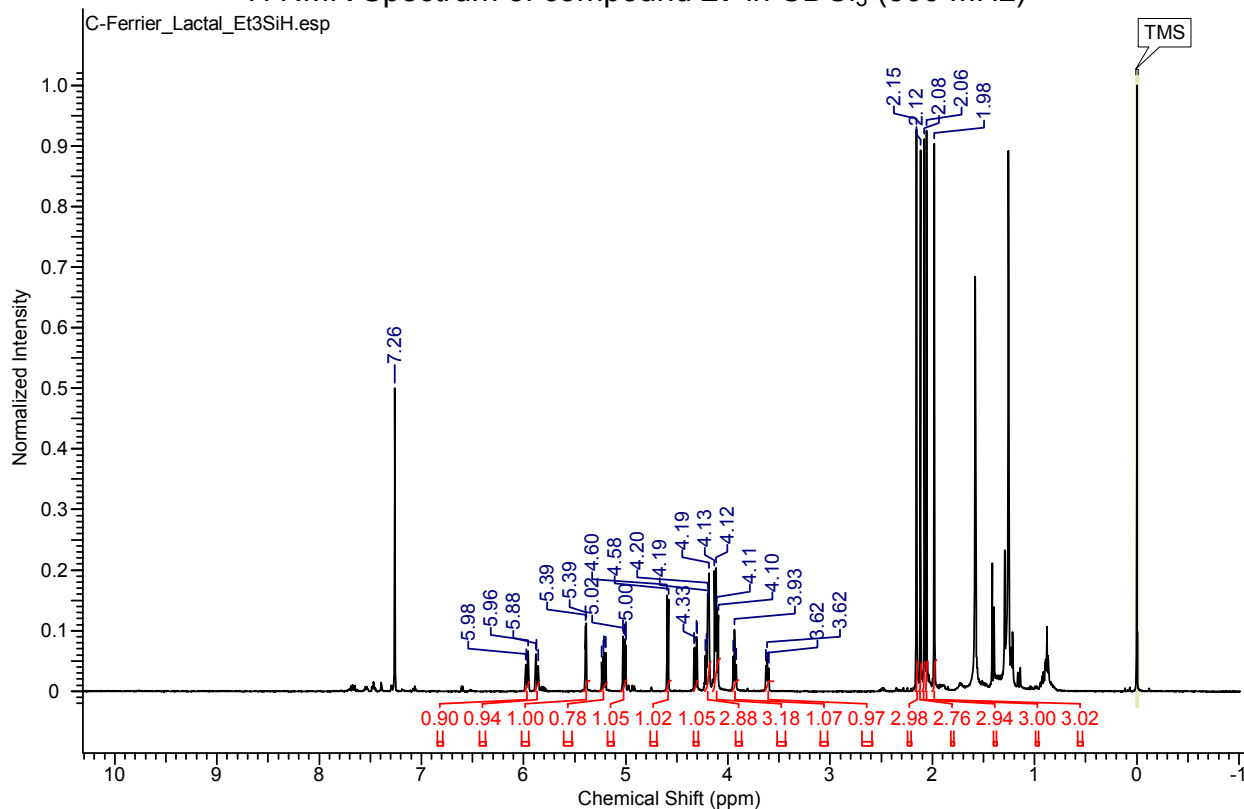

### <sup>13</sup>C NMR Spectrum of compound **27** in CDCl<sub>3</sub> (75 MHz)

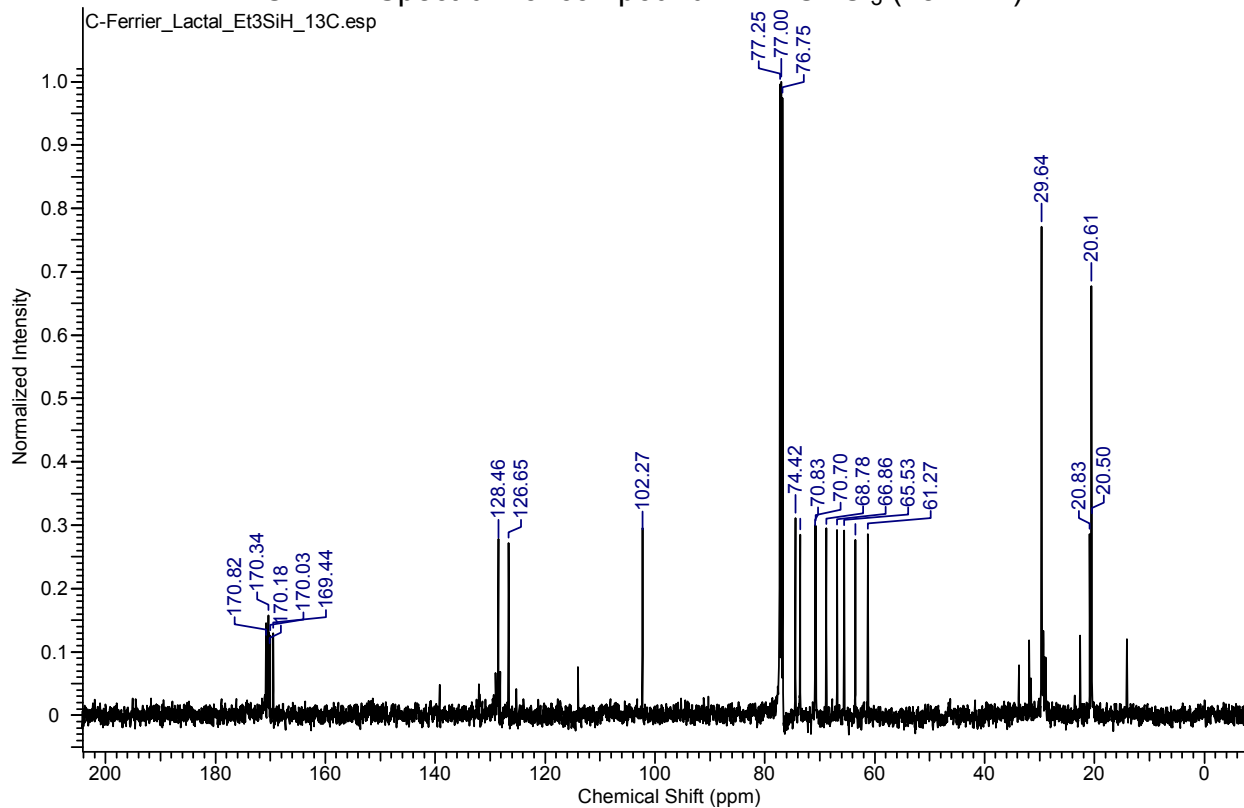

### <sup>1</sup>H NMR Spectrum of compound **28** in CDCl<sub>3</sub> (300 MHz)

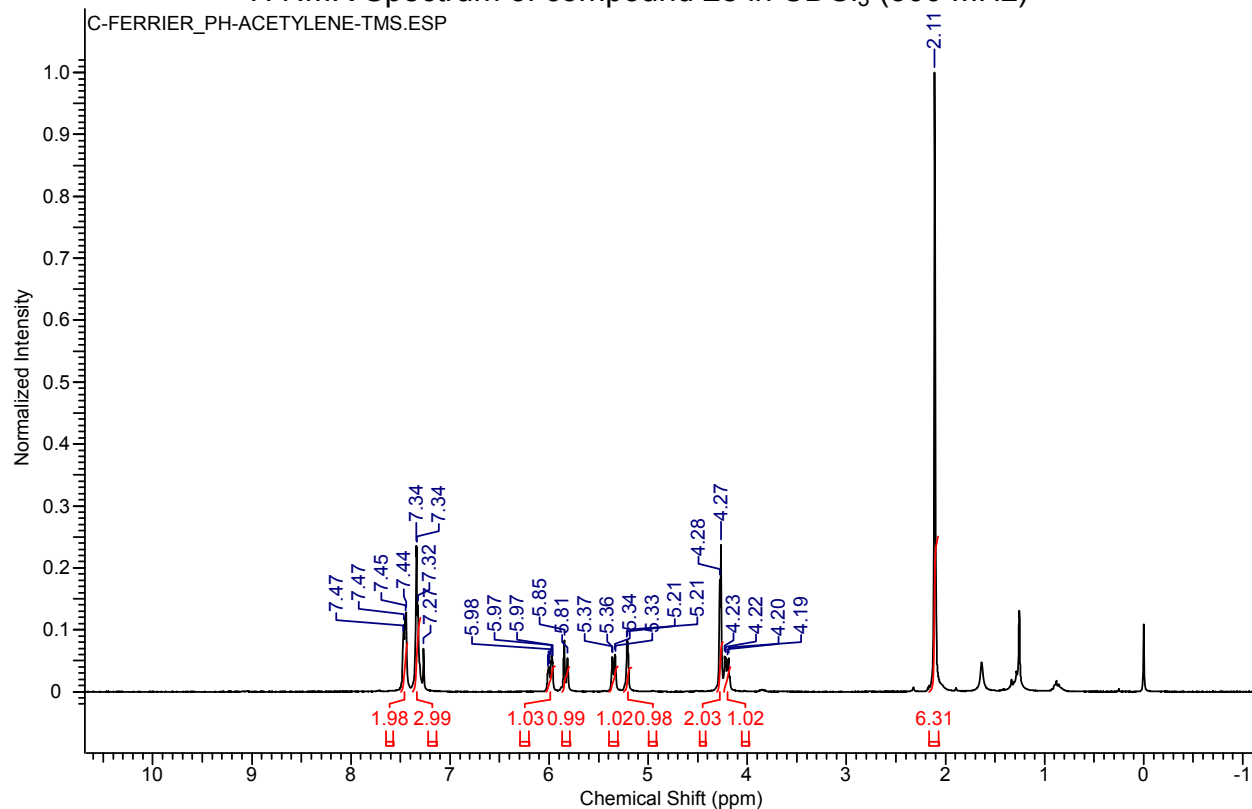

### <sup>13</sup>C NMR Spectrum of compound **28** in CDCl<sub>3</sub> (75 MHz)

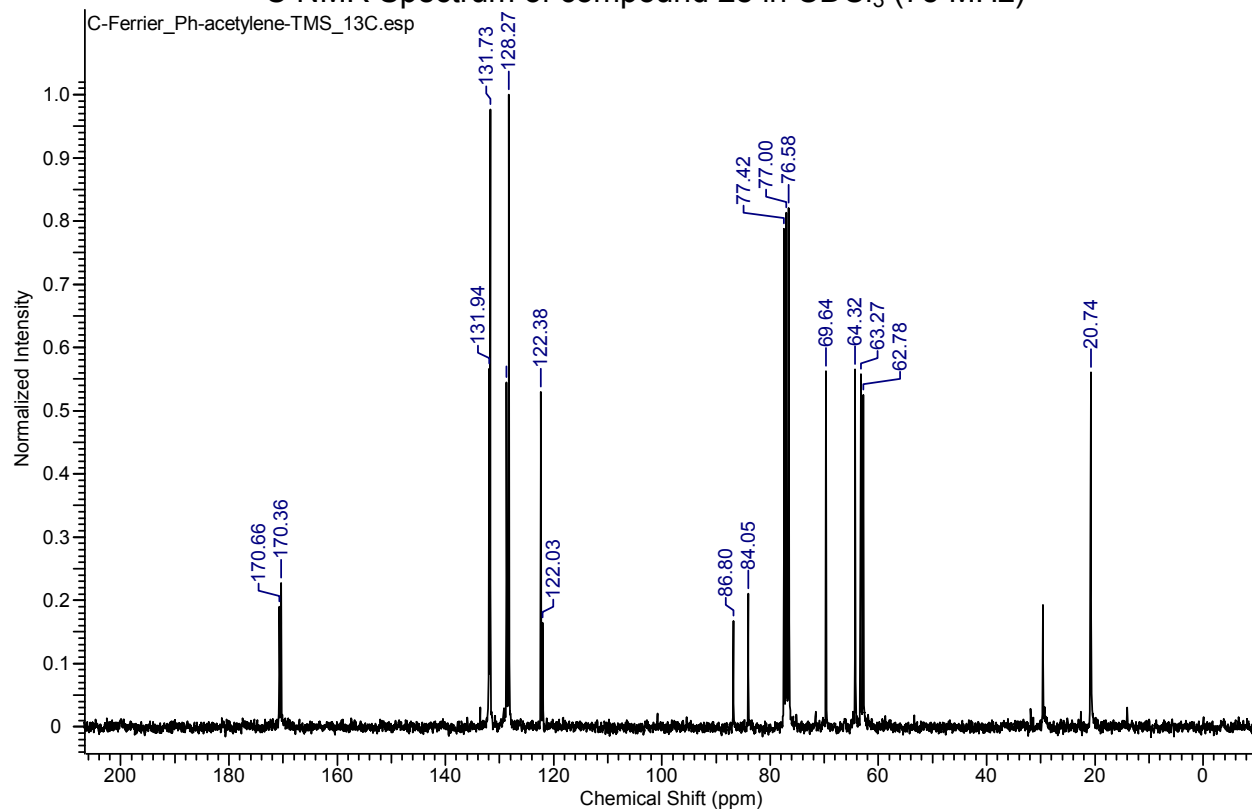

# <sup>1</sup>H NMR Spectrum of compound **29** in CDCl<sub>3</sub> (500 MHz)

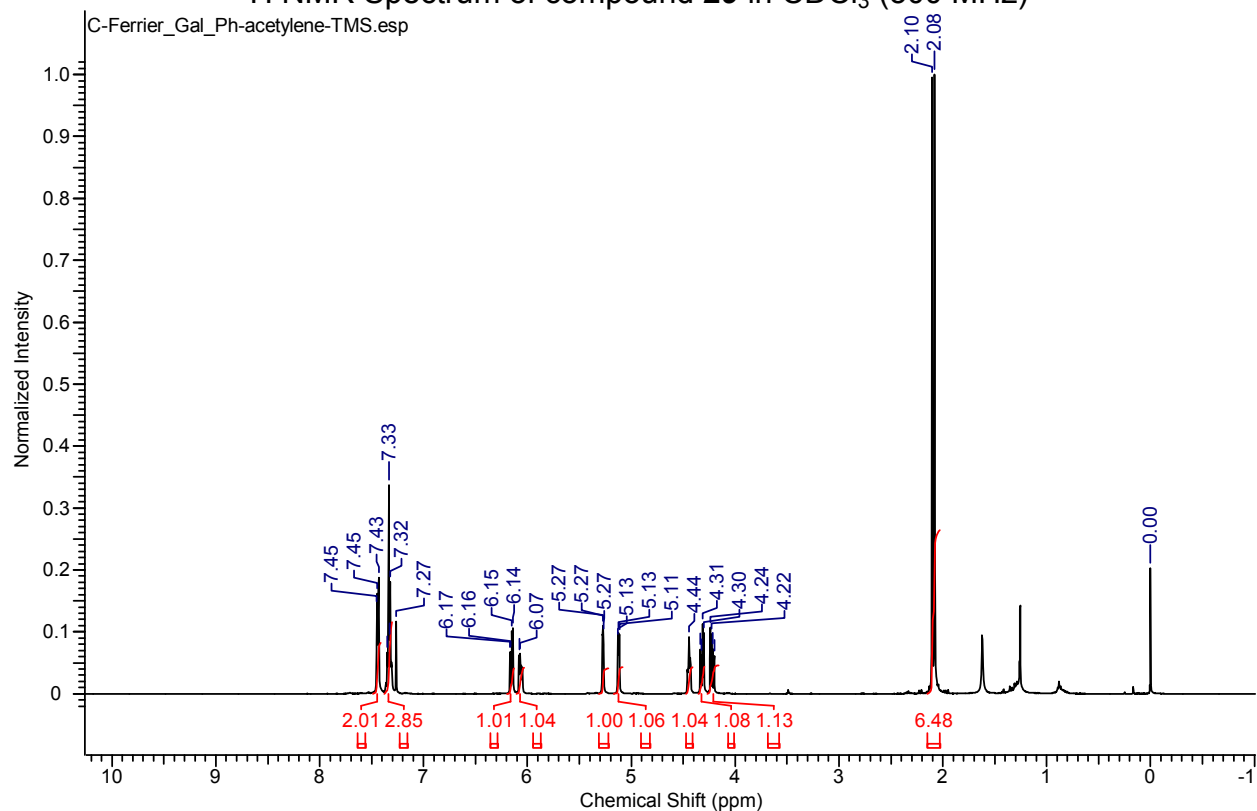

# <sup>13</sup>C NMR Spectrum of compound **29** in CDCl<sub>3</sub> (75 MHz)

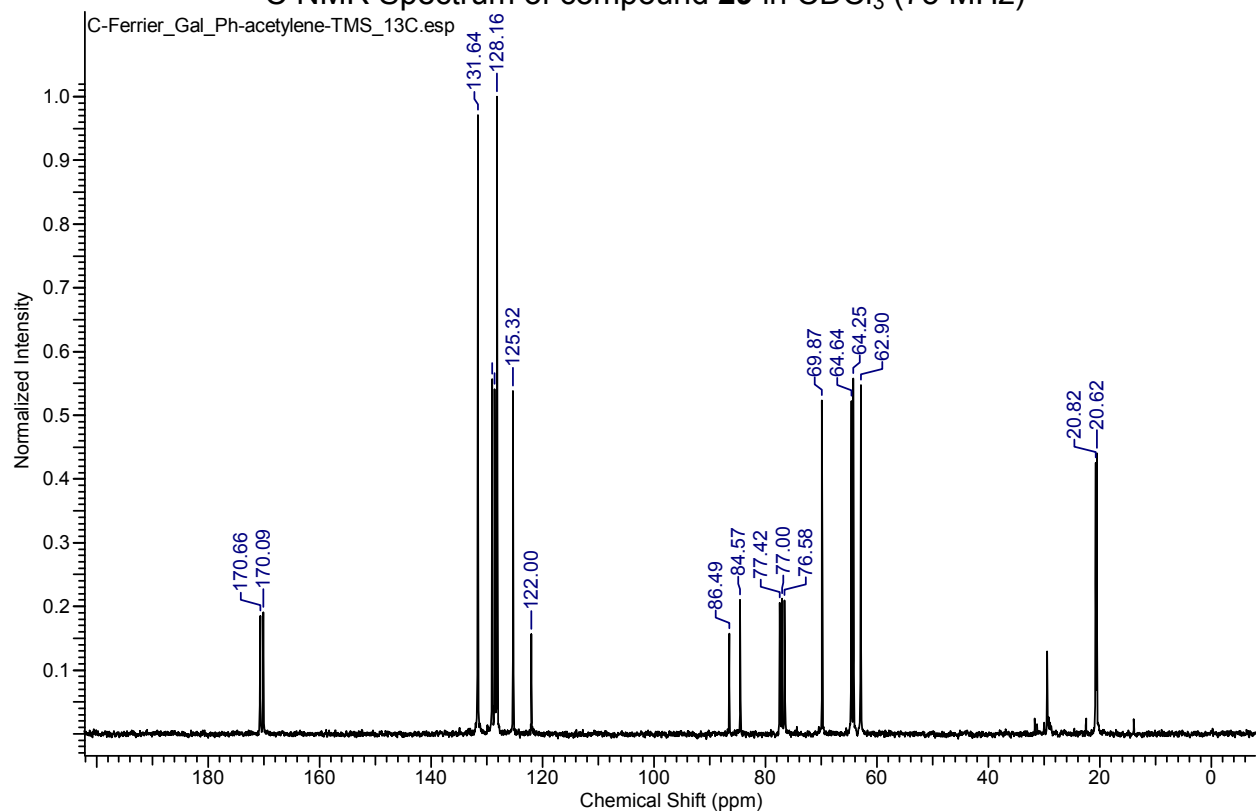

### <sup>1</sup>H NMR Spectrum of compound **30** in CDCl<sub>3</sub> (500 MHz)

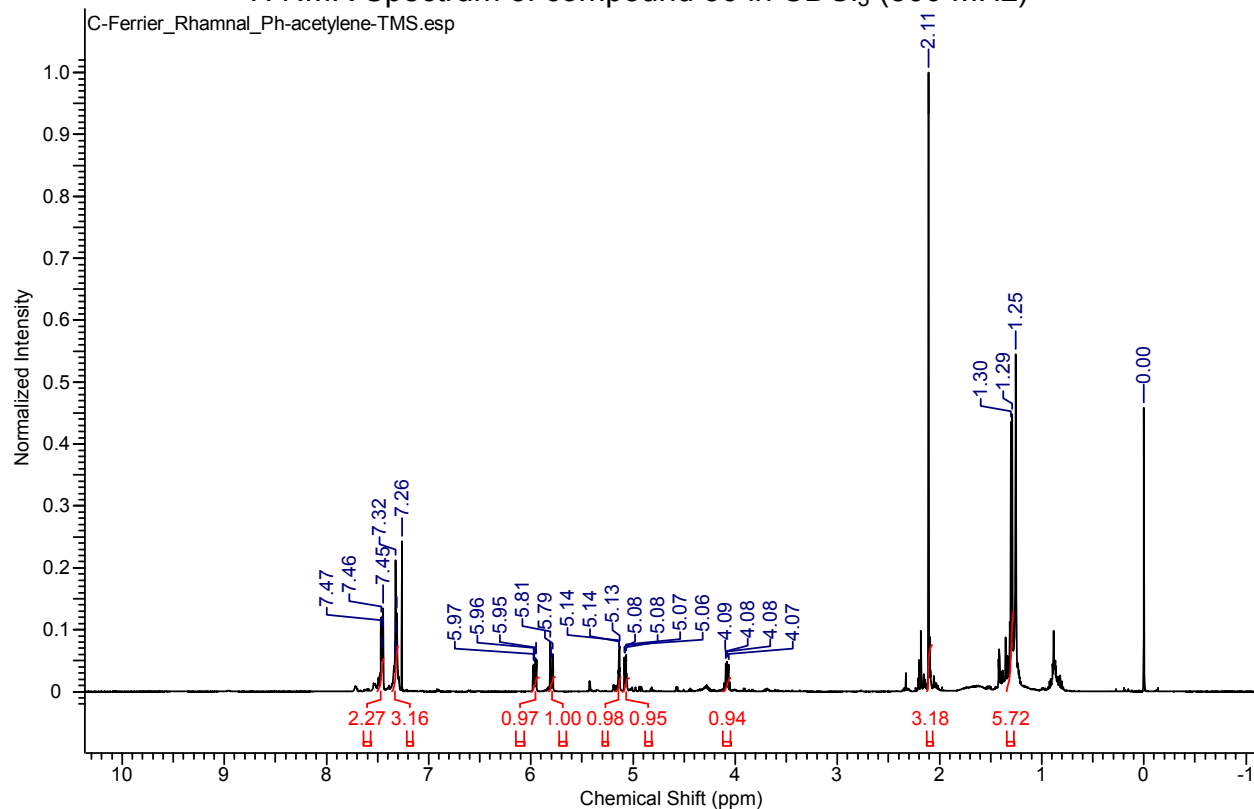

### <sup>13</sup>C NMR Spectrum of compound **30** in CDCl<sub>3</sub> (75 MHz)

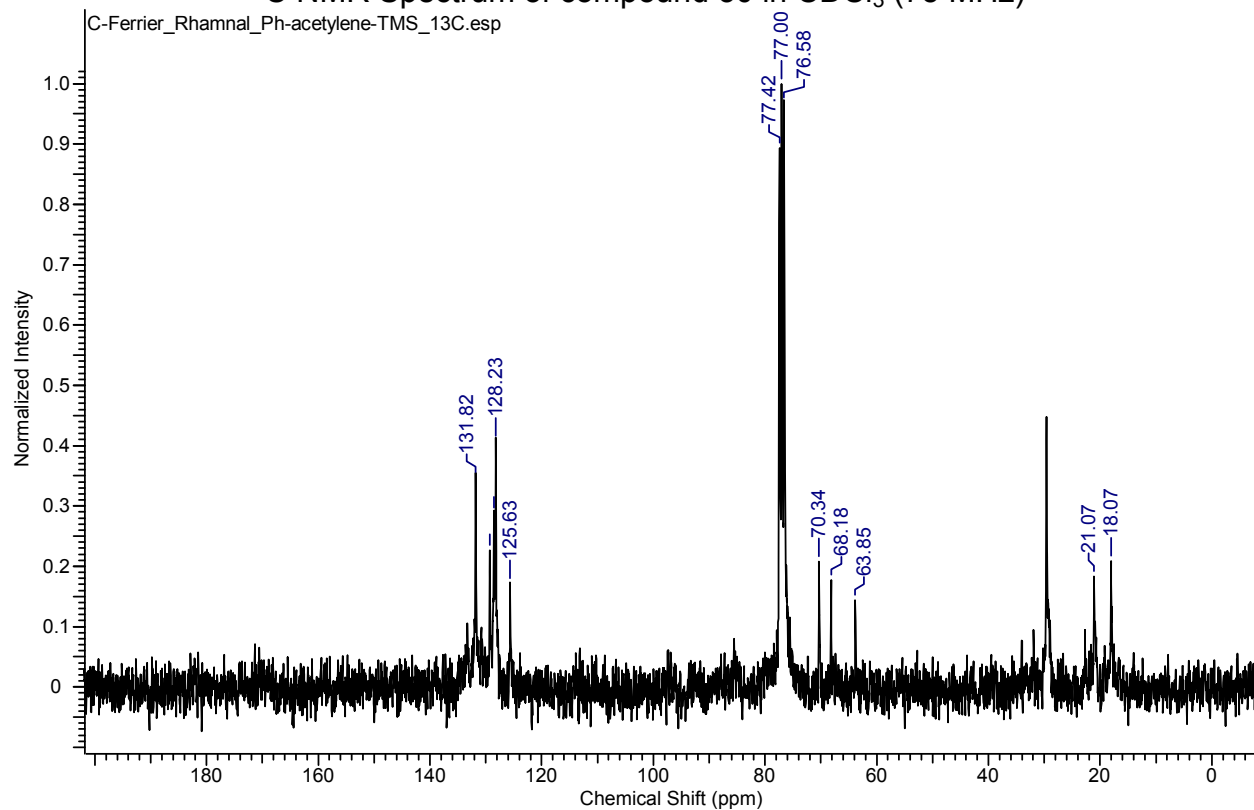



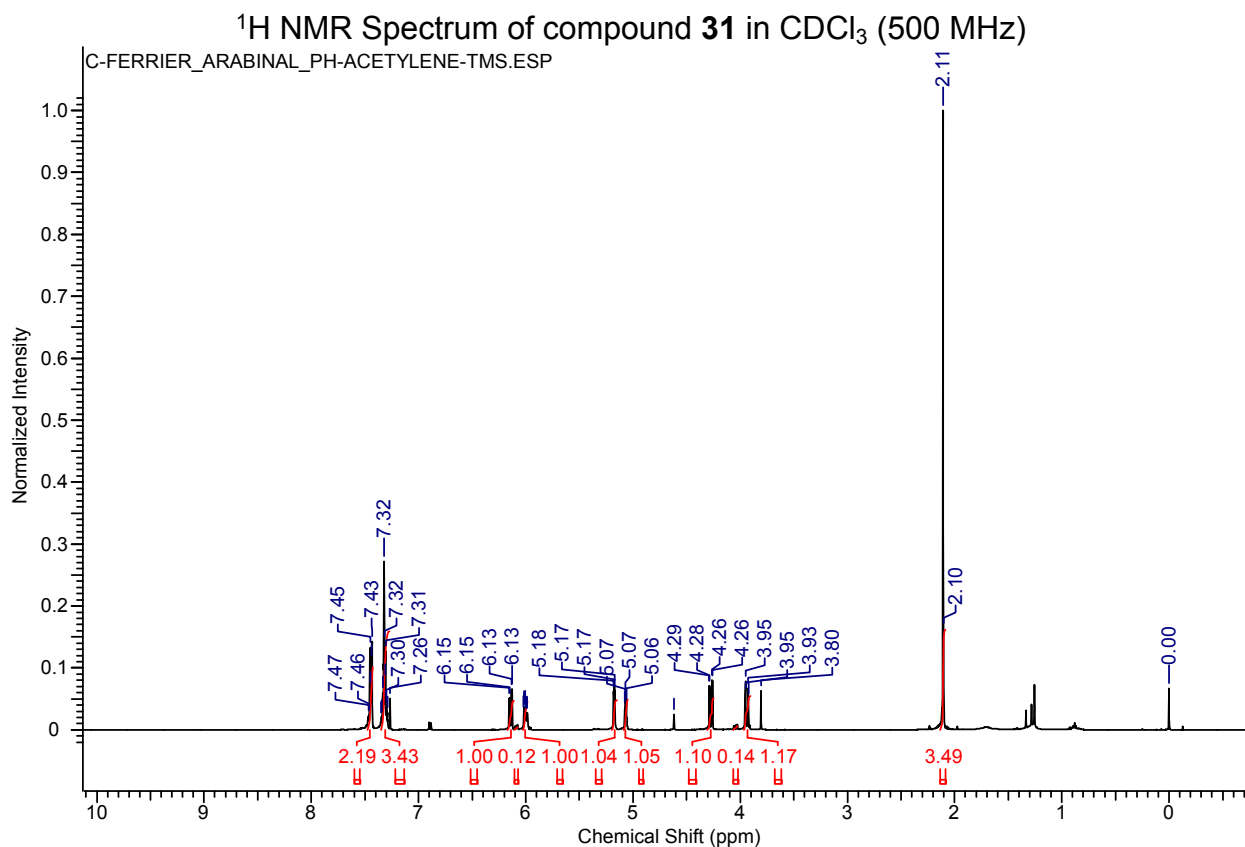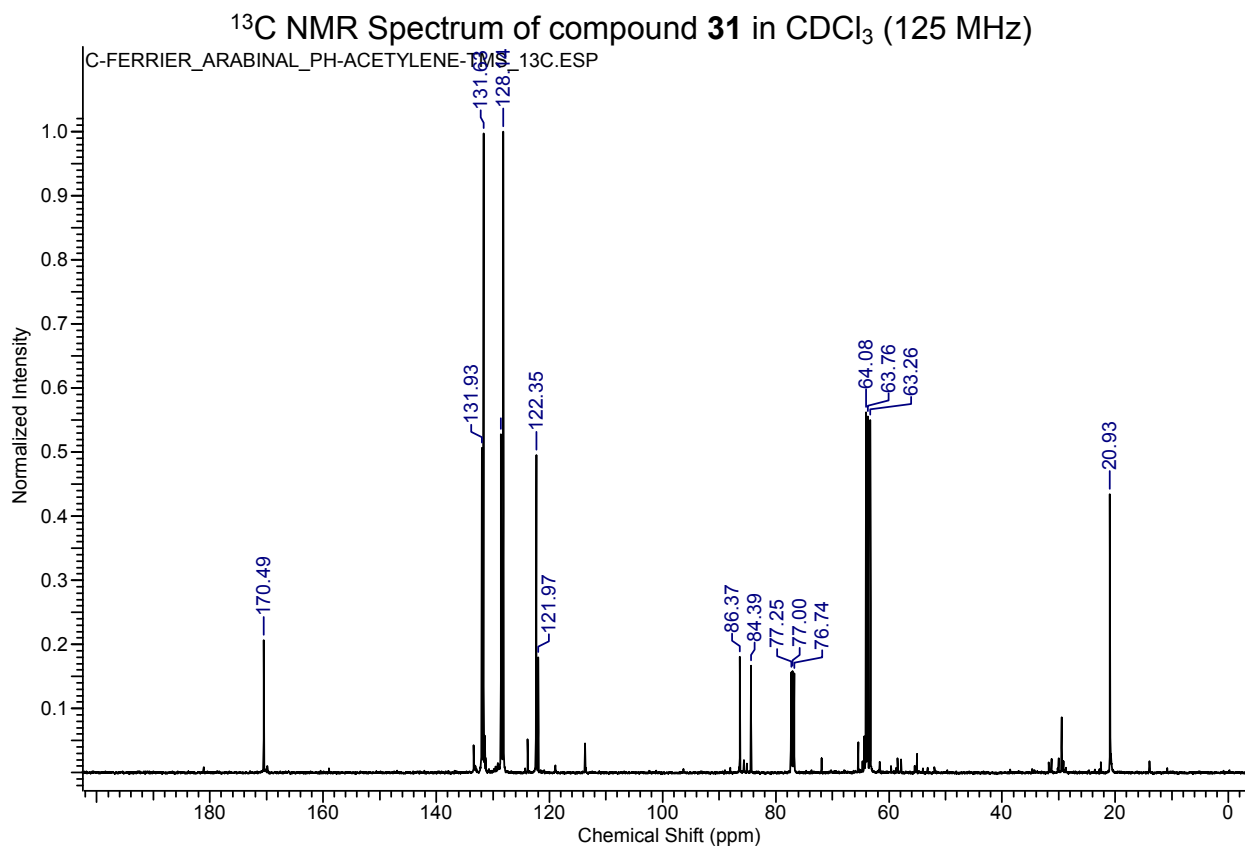

### <sup>1</sup>H NMR Spectrum of compound **32** in CDCl<sub>3</sub> (500 MHz)

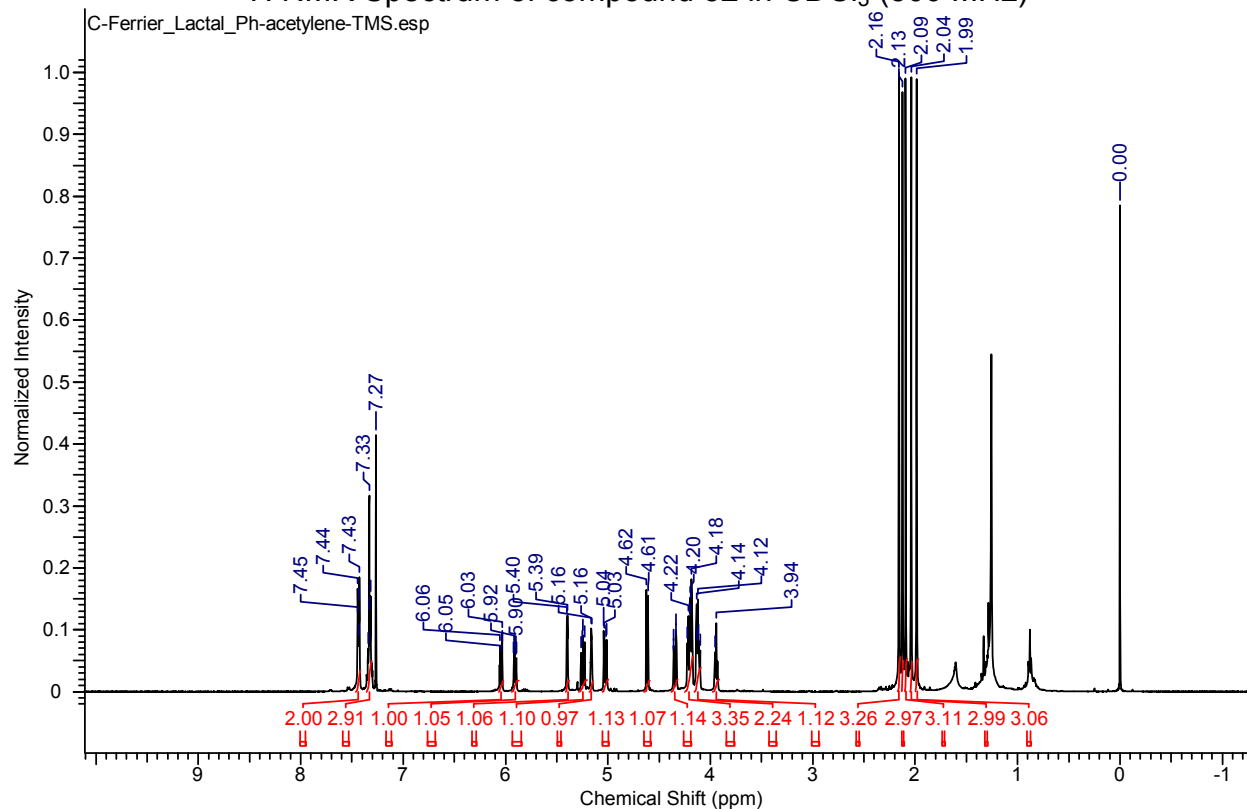

### <sup>13</sup>C NMR Spectrum of compound **32** in CDCl<sub>3</sub> (125 MHz)

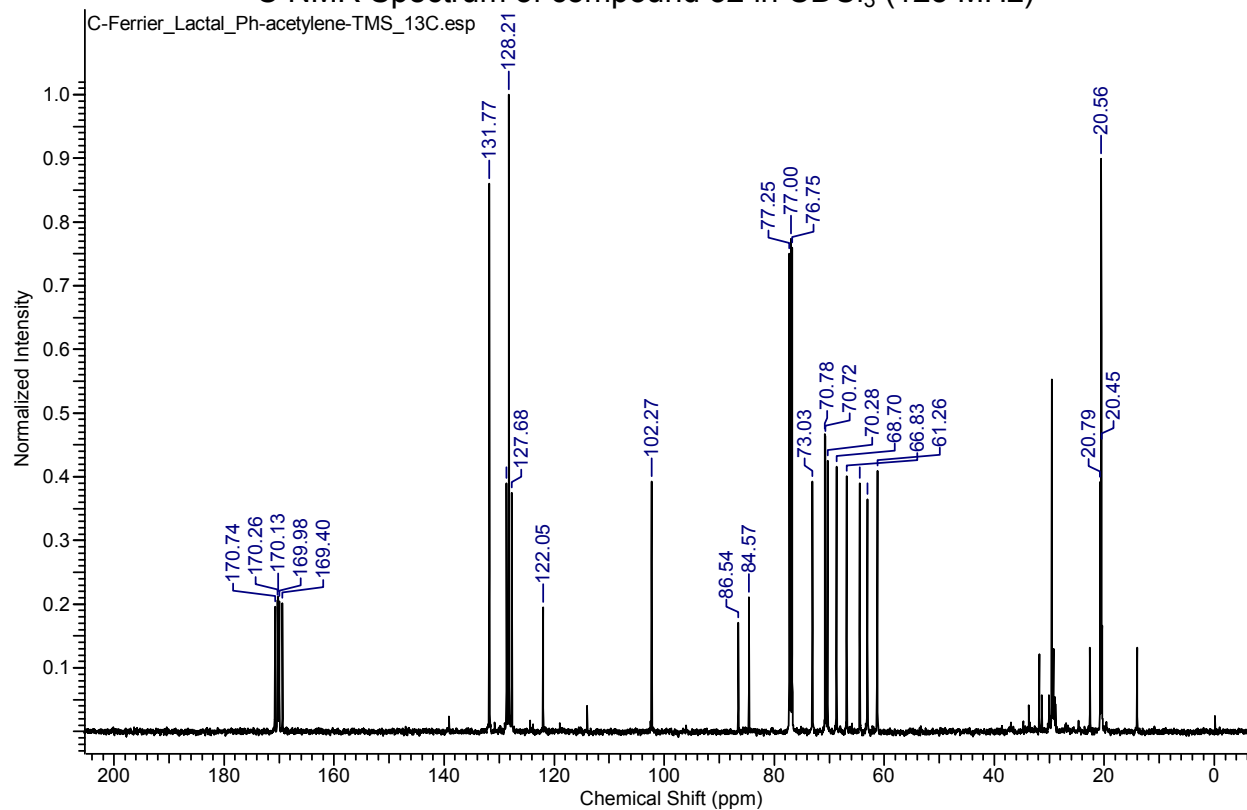

<sup>1</sup>H NMR Spectrum of compound **33** in CDCl<sub>3</sub> (500 MHz)

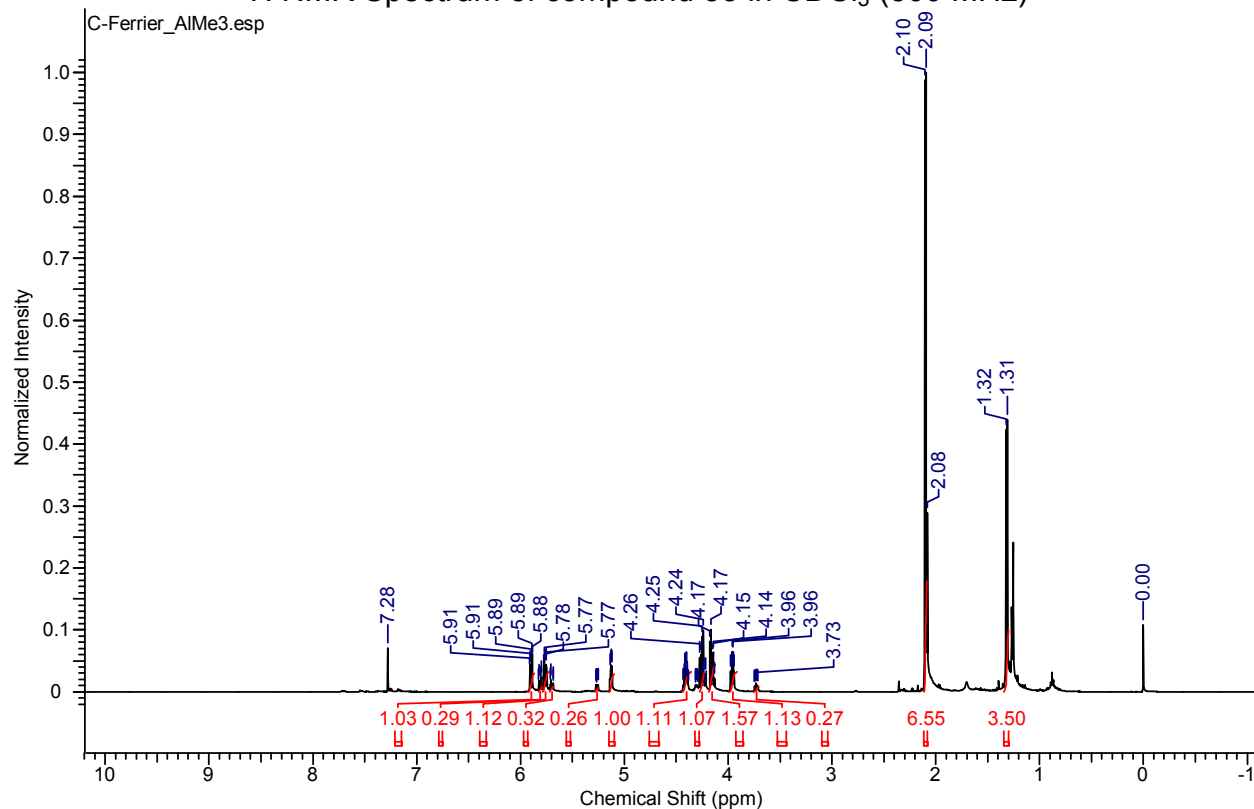

<sup>13</sup>C NMR Spectrum of compound **33** in CDCl<sub>3</sub> (75 MHz)

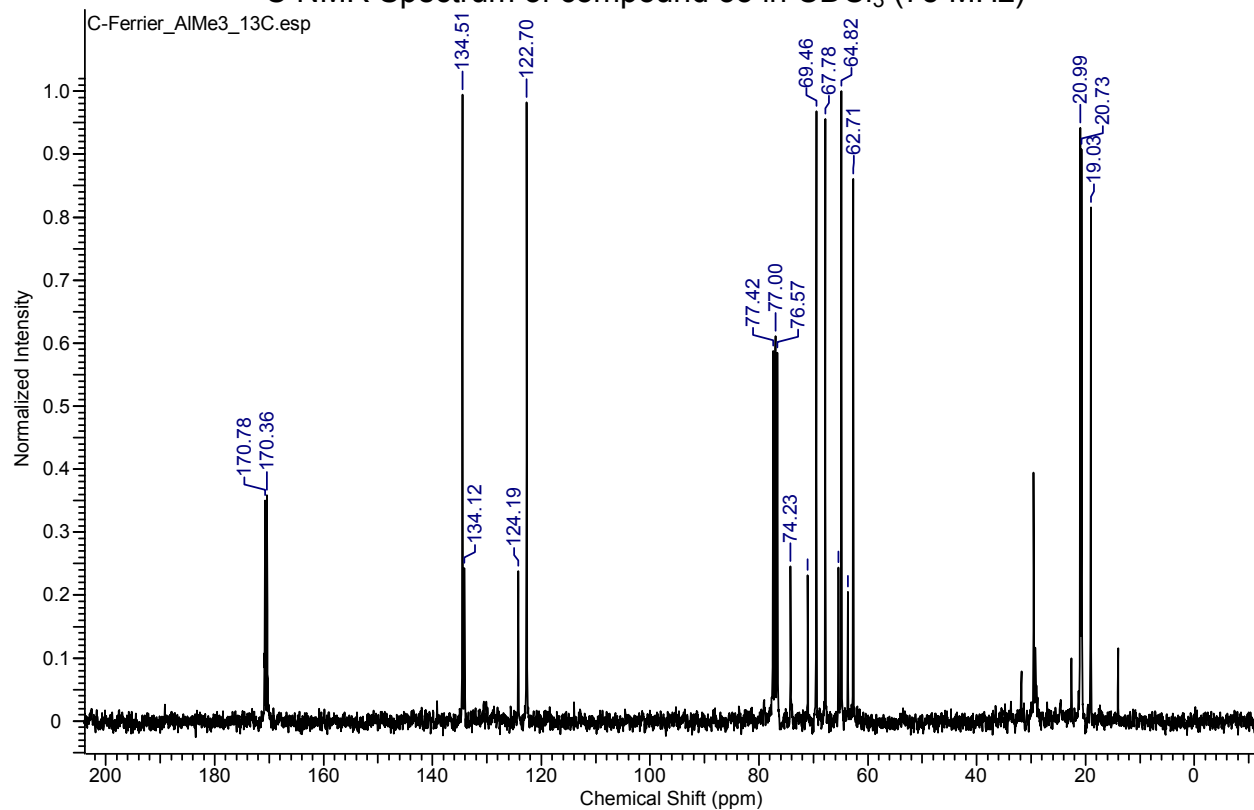

<sup>1</sup>H NMR Spectrum of compound **34** in CDCl<sub>3</sub> (300 MHz)

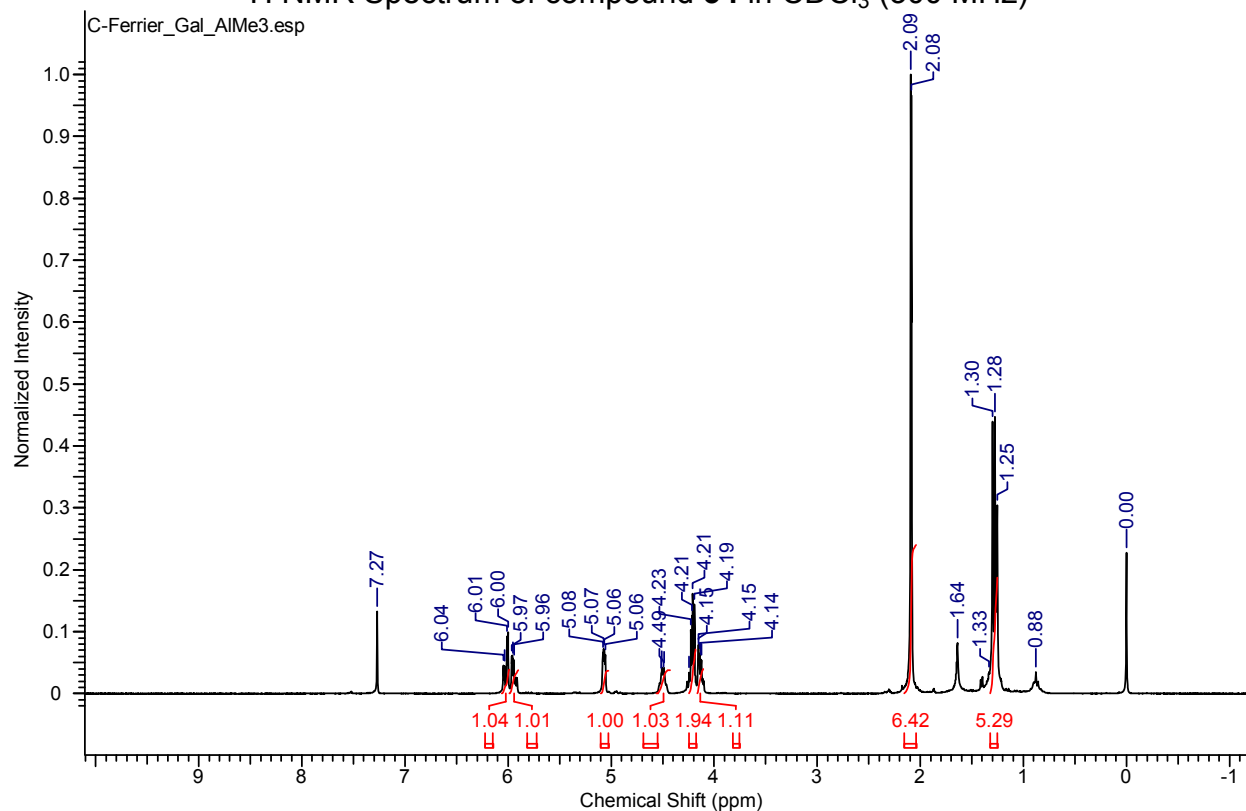

<sup>13</sup>C NMR Spectrum of compound **34** in CDCl<sub>3</sub> (75 MHz)

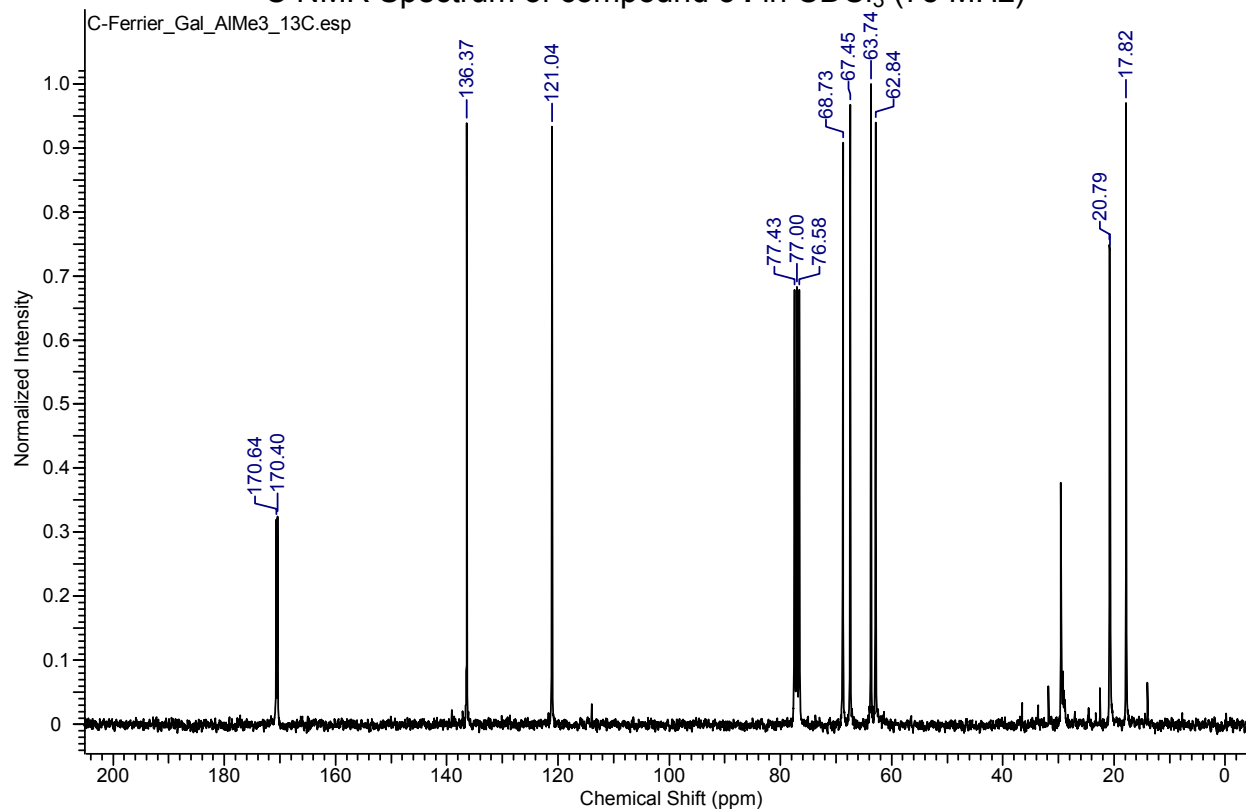

### $^1\text{H}$ NMR Spectrum of compound **35** in $\text{CDCl}_3$ (300 MHz)

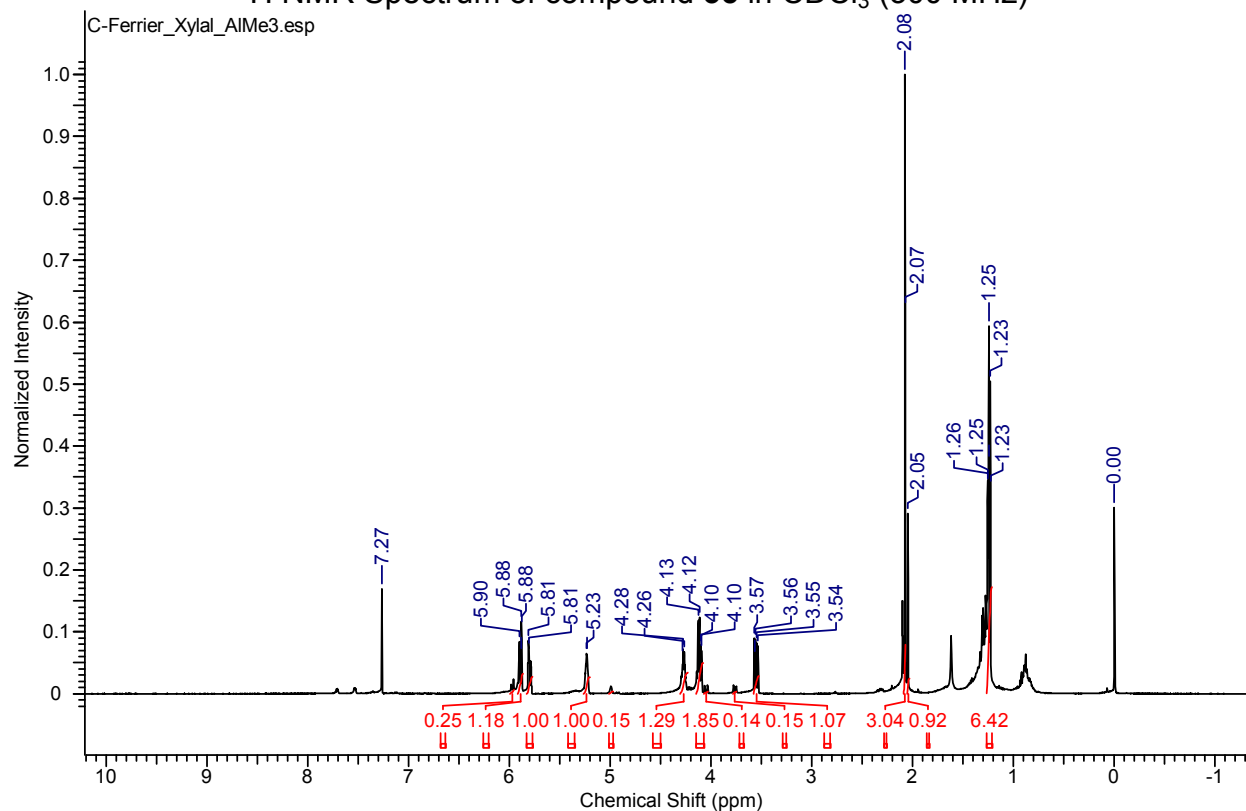

### $^{13}\text{C}$ NMR Spectrum of compound **35** in $\text{CDCl}_3$ (75 MHz)

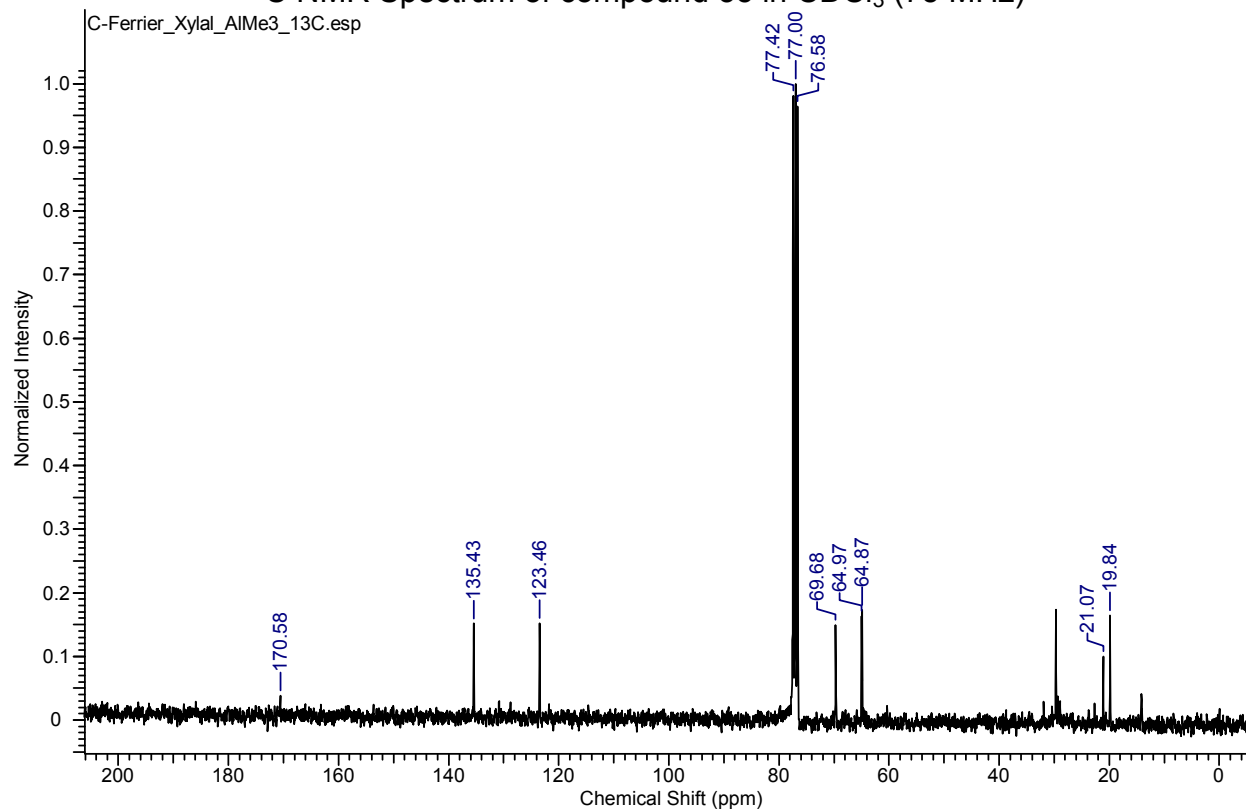

### <sup>1</sup>H NMR Spectrum of compound **36** in CDCl<sub>3</sub> (300 MHz)

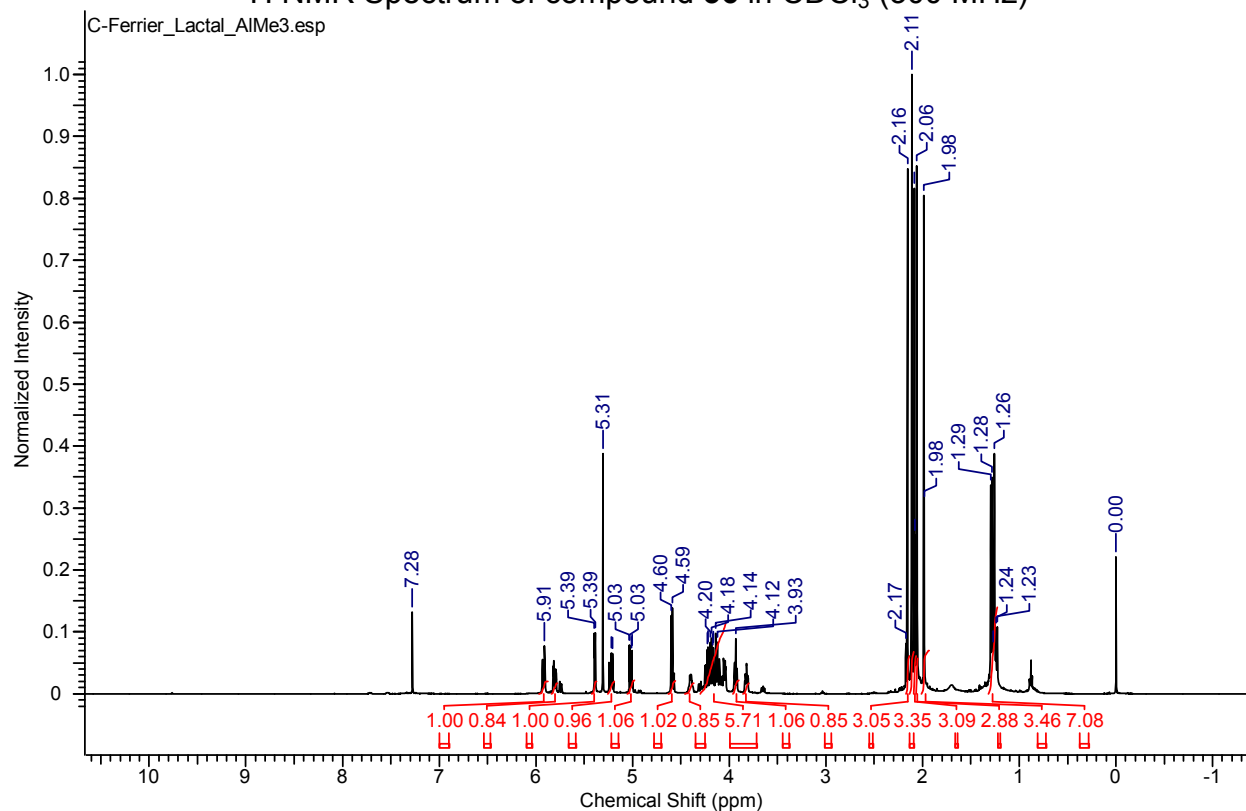

### <sup>13</sup>C NMR Spectrum of compound **36** in CDCl<sub>3</sub> (75 MHz)

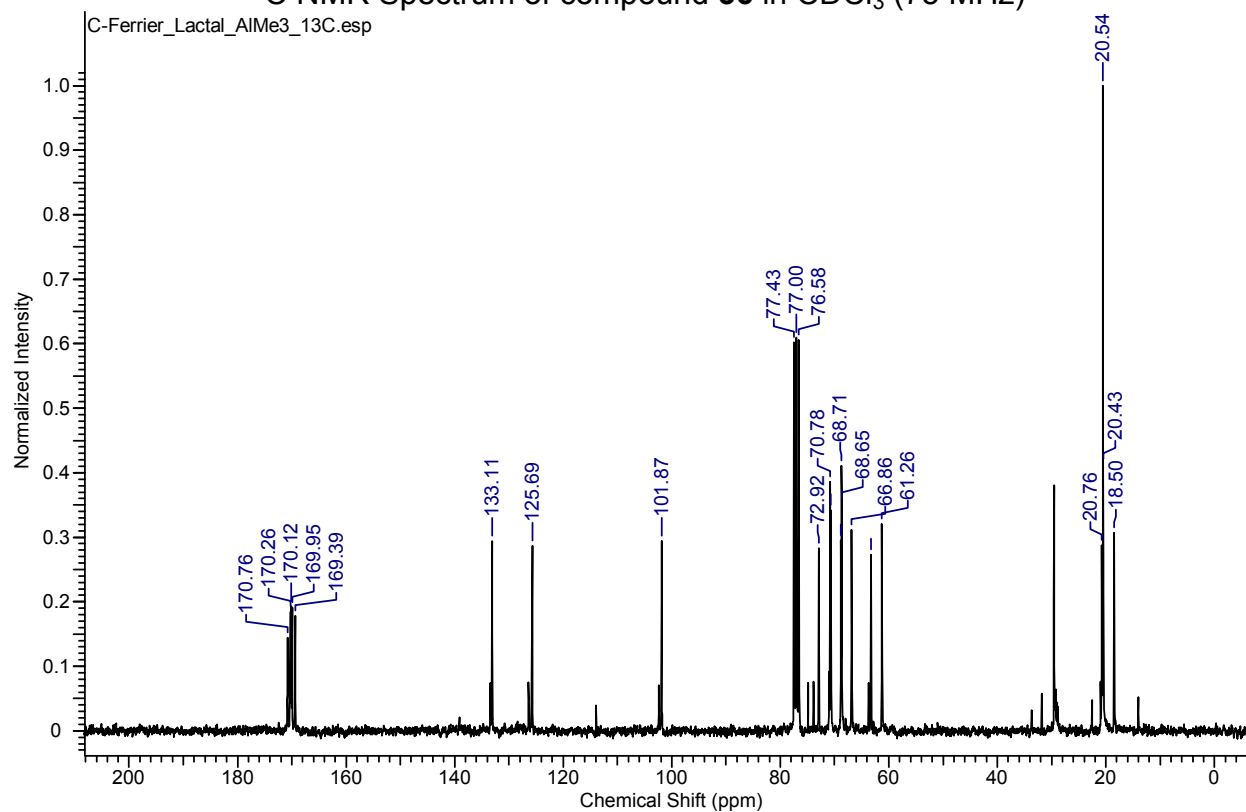

Supplement: c5ra03328d1.pdf [file c5ra03328d1.pdf]
